# Supplementary material for: Multiomics analysis reveals flavonoid accumulation and biosynthesis across different cultivation years and localities of Gongronemopsis tenacissima (Dai-Bai-Jie)
Source: PeerJ. 2025 Dec 16;13:e20439. doi: 10.7717/peerj.20439 (PMC12716135; doi:10.7717/peerj.20439)
Supplement: Supplemental Information 1 [file peerj-13-20439-s001.xlsx]

## Sheet: Sheet1
		CR1-0	CR2	CR3-1~3	CR3-4~6
GAPDH	CT1	17.1841	18.7664	18.201	18.6234
	CT2	17.7527	18.4938	17.8671	18.3038
	CT3	17.1358	18.3535	17.8103	18.4436
	AverageCT	17.3575	18.5379	17.9595	18.4569
Cluster-43408.2	CT1	21.2023	23.3044	22.314	20.4396
	CT2	21.1884	23.2854	22.3198	20.6123
	CT3	21.376	23.3109	22.2805	20.4185
	AverageCT	21.2555	23.3002	22.3048	20.4901
	△CT	3.898	4.76229	4.34534	2.03319
	△△CT	0	0.864292	0.447338	-1.86481
	2^-△△CT	1	0.549316	0.733395	3.64221
	△CT	3.84476	4.76646	4.35457	1.98269
		3.83081	4.74748	4.36037	2.15531
		4.01843	4.77294	4.32108	1.96156
	△△CT	-0.0532411	0.868462	0.456564	-1.91531
		-0.0671895	0.849475	0.462368	-1.74269
		0.120431	0.874938	0.423082	-1.93644
	2^-△△CT	1.03759	0.54773	0.72872	3.77196
		1.04767	0.554987	0.725794	3.34658
		0.919913	0.545277	0.745829	3.8276
	STD	0.0903405	0.00686558	0.0141672	0.340135
		CR1-0	CR2	CR3-1~3	CR3-4~6
GAPDH	CT1	17.1841	18.7664	18.201	18.6234
	CT2	17.7527	18.4938	17.8671	18.3038
	CT3	17.1358	18.3535	17.8103	18.4436
	AverageCT	17.3575	18.5379	17.9595	18.4569
Cluster-46899.5	CT1	16.8281	18.8885	19.3865	18.8615
	CT2	16.7859	18.986	19.1445	18.491
	CT3	16.9249	18.9035	19.3561	18.7547
	AverageCT	16.8463	18.926	19.2957	18.7024
	△CT	-0.511224	0.388087	1.33625	0.245422
	△△CT	0	0.899311	1.84748	0.756646
	2^-△△CT	1	0.536143	0.277878	0.591871
	△CT	-0.529469	0.350589	1.42705	0.404521
		-0.571599	0.448108	1.18506	0.0340284
		-0.432604	0.365564	1.39665	0.297716
	△△CT	-0.0182451	0.861813	1.93827	0.915745
		-0.0603746	0.959332	1.69629	0.545252
		0.0786196	0.876788	1.90787	0.80894
	2^-△△CT	1.01273	0.550261	0.260928	0.53007
		1.04274	0.514295	0.30858	0.685271
		0.946963	0.544579	0.266485	0.570801
	STD	0.0489863	0.0193344	0.0260559	0.0804674
		CR1-0	CR2	CR3-1~3	CR3-4~6
GAPDH	CT1	17.1841	18.7664	18.201	18.6234
	CT2	17.7527	18.4938	17.8671	18.3038
	CT3	17.1358	18.3535	17.8103	18.4436
	AverageCT	17.3575	18.5379	17.9595	18.4569
Cluster-51734.2	CT1	21.9127	23.6165	23.1542	21.7577
	CT2	21.9439	23.4335	23.1923	21.7557
	CT3	21.9264	23.4115	23.1356	21.8723
	AverageCT	21.9277	23.4872	23.1607	21.7952
	△CT	4.57014	4.94923	5.20123	3.33828
	△△CT	0	0.379091	0.631084	-1.23186
	2^-△△CT	1	0.768922	0.645691	2.34869
	△CT	4.55515	5.07861	5.19469	3.30081
		4.58641	4.89554	5.2328	3.29871
		4.56887	4.87354	5.17618	3.41534
	△△CT	-0.0149937	0.508472	0.624551	-1.26934
		0.0162659	0.325401	0.662662	-1.27143
		-0.0012722	0.3034	0.606038	-1.1548
	2^-△△CT	1.01045	0.702966	0.648622	2.41051
		0.988789	0.798076	0.631712	2.41401
		1.00088	0.81034	0.656998	2.22654
	STD	0.0108537	0.0587729	0.0128811	0.107238
		CR1-0	CR2	CR3-1~3	CR3-4~6
GAPDH	CT1	17.1841	18.7664	18.201	18.6234
	CT2	17.7527	18.4938	17.8671	18.3038
	CT3	17.1358	18.3535	17.8103	18.4436
	AverageCT	17.3575	18.5379	17.9595	18.4569
Cluster-60047.2	CT1	21.2879	22.1745	22.1952	20.5311
	CT2	21.4202	22.0297	22.4505	20.6014
	CT3	21.6055	22.1764	21.9658	20.4416
	AverageCT	21.4378	22.1269	22.2038	20.5215
	△CT	4.08031	3.58898	4.24436	2.06455
	△△CT	0	-0.49133	0.164052	-2.01576
	2^-△△CT	1	1.40574	0.892515	4.04394
	△CT	3.93038	3.63663	4.23574	2.07412
		4.06264	3.49182	4.491	2.14443
		4.24791	3.63849	4.00635	1.98467
	△△CT	-0.149931	-0.44368	0.155425	-2.0062
		-0.0176716	-0.588488	0.410688	-1.93588
		0.167603	-0.441824	-0.0739562	-2.09564
	2^-△△CT	1.10952	1.36007	0.897868	4.01721
		1.01232	1.50367	0.752265	3.82613
		0.890321	1.35832	1.0526	4.27416
	STD	0.109831	0.0834172	0.15019	0.31681
		CR1-0	CR2	CR3-1~3	CR3-4~6
GAPDH	CT1	17.1841	18.7664	18.201	18.6234
	CT2	17.7527	18.4938	17.8671	18.3038
	CT3	17.1358	18.3535	17.8103	18.4436
	AverageCT	17.3575	18.5379	17.9595	18.4569
Cluster-63886.1	CT1	20.0142	23.9046	21.7009	21.0555
	CT2	20.2817	23.9973	21.632	21.0337
	CT3	20.4313	23.7199	21.6205	20.9544
	AverageCT	20.2424	23.8739	21.6511	21.0145
	△CT	2.88487	5.33599	3.69166	2.55758
	△△CT	0	2.45112	0.806793	-0.327286
	2^-△△CT	1	0.182869	0.571651	1.25465
	△CT	2.65664	5.36668	3.74141	2.59851
		2.92421	5.45934	3.67257	2.57674
		3.07375	5.18195	3.66101	2.49749
	△△CT	-0.228228	2.48182	0.856542	-0.286354
		0.039341	2.57447	0.7877	-0.30813
		0.188887	2.29708	0.776138	-0.387375
	2^-△△CT	1.17139	0.179019	0.552275	1.21955
		0.973099	0.167883	0.579267	1.2381
		0.877282	0.203475	0.583928	1.30801
	STD	0.150002	0.0182065	0.0223822	0.0466475
