# Supplementary material for: Multiomics analysis reveals flavonoid accumulation and biosynthesis across different cultivation years and localities of Gongronemopsis tenacissima (Dai-Bai-Jie)
Source: PeerJ. 2025 Dec 16;13:e20439. doi: 10.7717/peerj.20439 (PMC12716135; doi:10.7717/peerj.20439)
Supplement: Supplemental Information 2 [file peerj-13-20439-s002.xlsx]

## Sheet: Sheet1
Formula	Compounds	Class I	Class II	CAS	Level	CR1-1-0	CR1-2-0	CR1-3-0	CR2-1	CR2-2	CR2-3	CR3-1	CR3-2	CR3-3	CR4-1	CR4-2	CR4-3	cpd_ID	kegg_map	CR3_vs_CR4_VIP	CR3_vs_CR4_P-value	CR3_vs_CR4_Fold_Change	CR3_vs_CR4_Log2FC	CR3_vs_CR4_Type	CR2_vs_CR3_VIP	CR2_vs_CR3_P-value	CR2_vs_CR3_Fold_Change	CR2_vs_CR3_Log2FC	CR2_vs_CR3_Type	CR1-0_vs_CR3_VIP	CR1-0_vs_CR3_P-value	CR1-0_vs_CR3_Fold_Change	CR1-0_vs_CR3_Log2FC	CR1-0_vs_CR3_Type	CR1-0_vs_CR2_VIP	CR1-0_vs_CR2_P-value	CR1-0_vs_CR2_Fold_Change	CR1-0_vs_CR2_Log2FC	CR1-0_vs_CR2_Type
C20H20O6	6,7-dimethoxy-2-[2-(4'-hydroxy-3'-methoxyphenyl)ethyl]chromone	Others	Chromone	-	1	4.04487e+06	4.77786e+06	3.21528e+06	4.75324e+06	5.3169e+06	4.51861e+06	2.13946e+06	2.39019e+06	2.06896e+06	3.81231e+06	3.75946e+06	3.70329e+06	-	-	-	-	-	-	-	1.20829	0.00315914	0.452308	-1.14462	down	-	-	-	-	-	-	-	-	-	-
C21H22O12	Protocatechuic acid 4-O-(2''-O-Vanilloyl)Glucoside	Phenolic acids	Phenolic acids	-	1	1.03199e+06	2.216e+06	2.72007e+06	1.42103e+06	1.33752e+06	1.25608e+06	964979	767723	791803	725884	654302	701988	-	-	-	-	-	-	-	-	-	-	-	-	1.04156	0.14674	0.423003	-1.24126	down	-	-	-	-	-
C17H14O7	Rhamnazin (3,4',5-Trihydroxy-3',7-dimethoxyflavone)	Flavonoids	Flavonols	552-54-5	3	4.15689e+06	397897	3.74243e+06	1.81098e+06	1.78082e+06	1.87062e+06	753850	787288	778634	1.37828e+06	1.42678e+06	1.49811e+06	-	-	-	-	-	-	-	1.22242	0.000142503	0.424679	-1.23555	down	-	-	-	-	-	-	-	-	-	-
C53H78O19	Marstenacisside A7	Steroids	Steroidal saponins	-	1	1.19702e+06	530466	1.70401e+06	2.29669e+06	2.23716e+06	2.3352e+06	1.01904e+06	1.00647e+06	986114	1.76573e+06	1.84228e+06	1.91438e+06	-	-	-	-	-	-	-	1.22307	0.000140866	0.438433	-1.18957	down	-	-	-	-	-	-	-	-	-	-
C17H14O7	Quercetin-3,4'-Dimethyl Ether	Flavonoids	Flavonols	33429-83-3	3	989278	786594	1.1738e+06	606553	706575	604469	419978	454869	441986	611054	556334	589927	-	-	-	-	-	-	-	-	-	-	-	-	1.2546	0.038731	0.446434	-1.16348	down	-	-	-	-	-
C10H8O3	7-methoxycoumarin	Lignans and Coumarins	Coumarins	-	2	1.96047e+06	1.31776e+06	6.14676e+06	1.99138e+07	1.83742e+07	1.65176e+07	9.01734e+06	9.76404e+06	9.54332e+06	8.99385e+06	8.7579e+06	8.41088e+06	-	-	-	-	-	-	-	-	-	-	-	-	1.07298	0.0504759	3.00528	1.5875	up	1.14212	0.00211395	5.81493	2.53976	up
C23H24O13	Limocitrin-7-O-glucoside	Flavonoids	Flavonols	-	3	2.01303e+07	3.498e+06	9.34136e+06	4.61923e+06	4.7496e+06	5.53205e+06	1.84165e+06	1.80736e+06	2.1214e+06	2.55885e+06	2.44319e+06	2.50936e+06	-	-	-	-	-	-	-	1.20771	0.00449102	0.387253	-1.36865	down	1.08134	0.203749	0.175022	-2.51439	down	-	-	-	-	-
C10H20N2O3S	Val-Met	Amino acids and derivatives	Amino acids and derivatives	-	3	4.13323e+06	3.83012e+06	3.62708e+06	3.12609e+07	3.22407e+07	3.31896e+07	1.12784e+07	1.20397e+07	1.14528e+07	1.00646e+07	9.42301e+06	1.12743e+07	-	-	-	-	-	-	-	1.22224	0.000133577	0.359608	-1.4755	down	1.30609	3.73115e-05	2.99997	1.58495	up	1.26933	0.000169309	8.34233	3.06045	up
C30H48O4	2,3-Dihydroxyolean-12-en-28-oic acid (2-Hydroxyoleanolic acid)	Terpenoids	Triterpene	26707-60-8	1	1.74835e+06	3.36109e+06	2.45699e+06	6.91531e+06	6.13465e+06	5.49393e+06	4.0585e+06	4.96573e+06	4.57991e+06	2.54988e+06	2.55292e+06	2.73682e+06	-	-	-	-	-	-	-	-	-	-	-	-	-	-	-	-	-	1.16822	0.00438151	2.45081	1.29326	up
C18H34O5	9,10-Dihydroxy-12,13-epoxyoctadecanoic acid	Lipids	Free fatty acids	-	3	421471	535572	741991	122937	119541	117613	65658.7	75217.9	76291.3	329055	324905	337437	C14837	ko00591	1.29417	9.18581e-07	4.56512	2.19065	up	-	-	-	-	-	1.29287	0.0340715	0.127818	-2.96783	down	1.24416	0.0414068	0.211939	-2.23828	down
C30H48O4	Cordianal C	Terpenoids	Triterpene	-	3	2.06365e+06	4.32295e+06	2.90517e+06	8.86664e+06	7.69863e+06	6.43867e+06	4.56052e+06	6.05108e+06	5.45913e+06	2.93613e+06	3.25201e+06	3.37086e+06	-	-	-	-	-	-	-	-	-	-	-	-	-	-	-	-	-	1.14176	0.00905683	2.47573	1.30786	up
C9H8O4	Caffeic acid	Phenolic acids	Phenolic acids	331-39-5	1	1.59504e+06	1.17431e+06	1.66278e+06	8.69118e+06	9.00633e+06	9.09976e+06	3.57116e+06	4.98807e+06	4.25788e+06	2.81025e+06	2.63129e+06	2.54689e+06	C01197	ko00940,ko01100,ko01110	-	-	-	-	-	1.18376	0.0044942	0.478299	-1.06401	down	1.26312	0.0124361	2.89186	1.532	up	1.25879	4.43082e-06	6.04613	2.59601	up
C2H7O4P	2-Hydroxyethylphosphonic acid	Organic acids	Organic acids	22987-21-9	3	57615.5	79251.4	135634	31922.4	57796.5	27634	51666.8	51752	43175.2	93366.7	126938	87658.7	C06451	ko00440,ko01100,ko01110	1.22268	0.0420926	2.10079	1.07093	up	-	-	-	-	-	-	-	-	-	-	-	-	-	-	-
C59H88O24	Marstenacisside B8	Steroids	Steroidal saponins	-	1	3.00187e+06	1.66598e+06	4.11059e+06	2.29884e+07	2.22642e+07	2.12851e+07	3.38872e+07	3.36121e+07	9.37168e+06	1.27804e+07	12100296	1.23342e+07	-	-	-	-	-	-	-	-	-	-	-	-	1.18168	0.106754	8.75678	3.1304	up	1.22676	5.70484e-05	7.57966	2.92213	up
C18H32O3	9S-Hydroxy-10E,12Z-octadecadienoic acid*	Lipids	Free fatty acids	15514-85-9	1	1.00403e+06	964366	810896	582183	602291	576998	359163	374741	371677	571156	550628	546263	C14767	ko00591	-	-	-	-	-	-	-	-	-	-	1.29548	0.0105759	0.397793	-1.32991	down	-	-	-	-	-
C18H30O2	Punicic acid (9Z,11E,13Z-octadecatrienoic acid)	Lipids	Free fatty acids	544-72-9	3	1.54076e+06	2.15567e+06	1.99325e+06	1.90369e+06	2.02184e+06	1.95775e+06	803877	849369	850813	3.75601e+06	3.61147e+06	3.62486e+06	C08364	-	1.2963	6.74457e-05	4.38981	2.13416	up	1.22142	0.000139889	0.425623	-1.23235	down	1.27187	0.0280136	0.440105	-1.18408	down	-	-	-	-	-
C27H30O16	Quercetin-3-O-rutinoside (Rutin)	Flavonoids	Flavonols	153-18-4	3	486723	995308	1.02607e+06	141277	152462	231792	655646	932806	878325	84226.4	85100.5	114522	C05625	ko00944,ko01100,ko01110	1.28485	0.0124115	0.115069	-3.11943	down	1.19008	0.010433	4.69388	2.23078	up	-	-	-	-	-	1.19038	0.0599558	0.209533	-2.25475	down
C6H12O6	D-Glucose	Others	Saccharides	50-99-7	3	2.05746e+06	1.05471e+06	2.37617e+06	2.30289e+06	2.28516e+06	2.34153e+06	1.05026e+06	1.02024e+06	1.09403e+06	1.07514e+06	1.06919e+06	948207	C00031	ko00010,ko00030,ko00052,ko00500,ko00520,ko00524,ko00901,ko01100,ko01110,ko02010	-	-	-	-	-	1.2216	2.47353e-06	0.456669	-1.13078	down	-	-	-	-	-	-	-	-	-	-
C16H28O9	Glucosyl 6,9-dihydroxydec-4-enoic acid	Others	Others	-	2	216475	60460.9	218662	253878	281107	211382	182043	100470	82980.4	93002.5	89007.9	50015	-	-	-	-	-	-	-	1.02691	0.0321408	0.489696	-1.03004	down	-	-	-	-	-	-	-	-	-	-
C6H13N3O3	L-Citrulline	Amino acids and derivatives	Amino acids and derivatives	372-75-8	3	3.11863e+06	7.99832e+06	3.46378e+06	2.03719e+07	2.11509e+07	2.03293e+07	2.61792e+07	2.46614e+07	2.66386e+07	1.64913e+07	1.65035e+07	1.63094e+07	C00327	ko00220,ko01100,ko01110,ko01230	-	-	-	-	-	-	-	-	-	-	1.2381	0.00230374	5.31381	2.40975	up	1.18858	0.00835374	4.24204	2.08476	up
C18H32O5	9,12,13-Trihydroxy-10,15-octadecadienoic acid	Lipids	Free fatty acids	-	3	106738	160601	209220	74467.8	63766.5	81172.4	53658.4	41124.6	45567.2	166089	226347	253403	-	-	1.27249	0.0209031	4.60162	2.20214	up	-	-	-	-	-	1.23659	0.0611335	0.294507	-1.76362	down	1.11295	0.0974065	0.460398	-1.11905	down
C18H30O4	9-Hydroxy-12-oxo-10(E),15(Z)-octadecadienoic acid	Lipids	Free fatty acids	-	2	220659	204002	466733	509440	524032	516452	83694.1	98906.8	85438.2	446468	456072	401453	C21923	ko00592,ko01110	1.29245	0.00122226	4.86493	2.28242	up	1.2217	3.70384e-07	0.172937	-2.53168	down	1.1838	0.133808	0.300697	-1.73362	down	-	-	-	-	-
C20H30O4	Araucarolone	Terpenoids	Ditepenoids	-	3	181749	149492	132724	313563	327215	323017	141871	169824	149785	138548	137217	145596	-	-	-	-	-	-	-	1.21072	0.000455674	0.478816	-1.06246	down	-	-	-	-	-	1.23435	0.00463164	2.0773	1.05471	up
C16H30O4	Hexadecanedioic acid	Lipids	Free fatty acids	505-54-4	1	76249.6	86766.5	86005.4	616071	633708	644291	463630	512360	468263	507049	517390	553931	C19615	ko00073,ko01100	-	-	-	-	-	-	-	-	-	-	1.30673	0.000980297	5.79971	2.53598	up	1.26865	2.86156e-05	7.60605	2.92715	up
C25H26O13	Apigenin-6,8-di-C-arabinoside*	Flavonoids	Flavones	-	3	574334	927168	1.59737e+06	501926	370441	436374	767571	707631	684266	453157	444427	481062	-	-	-	-	-	-	-	-	-	-	-	-	-	-	-	-	-	1.00515	0.183242	0.422328	-1.24356	down
C28H48NO7P	LysoPC 20:5	Lipids	LPC	162440-04-2	3	28914.4	19274	653080	81532.2	75776.4	92750.6	20060.7	22239.3	23158.1	63050.9	63379.2	158740	-	-	1.18167	0.148032	4.35653	2.12318	up	1.21615	0.00523586	0.26177	-1.93363	down	-	-	-	-	-	-	-	-	-	-
C30H48O3	3-Hydroxyurs-12-en-28-oic acid (Ursolic acid)	Terpenoids	Triterpene	77-52-1	2	97806.2	153900	150563	1.19665e+06	1.02861e+06	950881	496129	703041	524272	421263	381392	360871	C08988	-	-	-	-	-	-	-	-	-	-	-	1.2681	0.0154195	4.2843	2.09906	up	1.25453	0.0040935	7.89557	2.98104	up
C12H17N5O5	N6-(2-Hydroxyethyl)adenosine	Nucleotides and derivatives	Nucleotides and derivatives	4338-48-1	3	480452	341992	578175	313089	352216	319214	152560	176372	220559	266846	267649	275561	-	-	-	-	-	-	-	-	-	-	-	-	1.21357	0.0445161	0.392321	-1.34989	down	-	-	-	-	-
C16H25N5O11	Thr-Asp-Asn-Asp	Amino acids and derivatives	Amino acids and derivatives	-	3	1.35229e+06	971279	2.76637e+06	186970	212160	192768	112908	126306	99786.6	169381	164273	149233	-	-	-	-	-	-	-	-	-	-	-	-	1.2729	0.101142	0.0666021	-3.90829	down	1.22066	0.11096	0.116288	-3.10423	down
C11H20N4O5	Gly-Val-Asn	Amino acids and derivatives	Amino acids and derivatives	-	3	6.69697e+06	7.51907e+06	6.63322e+06	8.93068e+06	9.5866e+06	1.00116e+07	4.14698e+06	4.59639e+06	4.43318e+06	5.12448e+06	5.0063e+06	5.8903e+06	-	-	-	-	-	-	-	1.21542	0.00116168	0.461868	-1.11445	down	-	-	-	-	-	-	-	-	-	-
C11H11NO	1,2-dimethylquinolin-4(1H)-one	Alkaloids	Quinoline alkaloids	6760-40-3	2	1.69467e+06	1.26571e+06	975572	2.29708e+07	2.46182e+07	2.42338e+07	1.09143e+07	1.19518e+07	9.96289e+06	1.01962e+07	1.1001e+07	1.09794e+07	-	-	-	-	-	-	-	1.21215	7.89034e-05	0.457082	-1.12948	down	1.29496	0.00138931	8.34078	3.06018	up	1.2636	7.38255e-05	18.2479	4.18966	up
C22H30N4O10	Glu-Phe-Ser-Glu	Amino acids and derivatives	Amino acids and derivatives	-	3	24884.3	20348.7	23340	1.46294e+07	1.74659e+07	1.99865e+07	3.73966e+06	3.52434e+06	3.9696e+06	1.56468e+06	1.33529e+06	1.57802e+06	-	-	1.2843	0.000371404	0.398625	-1.3269	down	1.21381	0.0122262	0.215691	-2.21296	down	1.30935	0.00118984	163.82	7.35596	up	1.26907	0.00787116	759.51	9.56893	up
C21H36O4	1-α-Linolenoyl-glycerol*	Lipids	Glycerol ester	-	1	1.03795e+07	6.84823e+06	4.30907e+06	2.32777e+06	2.48531e+06	2.44935e+06	1.02487e+06	1.25949e+06	1.00897e+06	1.10201e+06	1.1448e+06	1.04629e+06	-	-	-	-	-	-	-	1.20371	0.00051555	0.453474	-1.14091	down	1.25616	0.0742288	0.152916	-2.70919	down	1.13168	0.113825	0.337209	-1.56828	down
C20H22O6	Clemaphenol A	Lignans and Coumarins	Lignans	362606-60-8	3	326817	510008	537990	458293	540524	567001	88379.3	56685	97918.2	60689.8	56131.3	41664.1	C17808	-	-	-	-	-	-	1.20139	0.00223714	0.155179	-2.68799	down	1.26708	0.0260671	0.176738	-2.50031	down	-	-	-	-	-
C8H9N	N-Benzylmethylene isomethylamine	Alkaloids	Alkaloids	-	1	3.68016e+06	3.63718e+06	3.84616e+06	1.41386e+07	1.34759e+07	1.39082e+07	2.07985e+06	2.16558e+06	2.00642e+06	3.48868e+06	3.31445e+06	3.25342e+06	-	-	-	-	-	-	-	1.22347	0.000135128	0.150565	-2.73154	down	-	-	-	-	-	1.2688	0.000105182	3.7195	1.89511	up
C10H18N2O5	Isoleucylaspartic acid	Amino acids and derivatives	Amino acids and derivatives	-	3	476153	438828	459125	2.37785e+06	2.32886e+06	2.46147e+06	673546	800372	738818	709472	604057	664547	-	-	-	-	-	-	-	1.21885	6.6447e-06	0.308689	-1.69577	down	-	-	-	-	-	1.26899	0.000162493	5.21661	2.38311	up
C18H28O2	Macrophypene B	Terpenoids	Ditepenoids	-	3	998532	806486	2.03628e+06	2.07616e+06	2.28662e+06	2.18555e+06	415462	473379	442079	2.19785e+06	2.33011e+06	2.26792e+06	-	-	1.29517	5.60256e-05	5.10615	2.35224	up	1.22166	0.000594794	0.203246	-2.2987	down	1.13505	0.159601	0.346476	-1.52917	down	-	-	-	-	-
C4H9NO2S	L-Homocysteine	Amino acids and derivatives	Amino acids and derivatives	6027-13-0	3	600711	469175	583692	3.16191e+06	2.77822e+06	2.64321e+06	412087	449526	456269	804054	830930	903008	C00155	ko00270,ko00920,ko01100,ko01110,ko01230	-	-	-	-	-	1.22091	0.00386105	0.15354	-2.70332	down	-	-	-	-	-	1.2607	0.00275766	5.19077	2.37595	up
C6H10N2O4	N-Alpha-Acetyl-L-Asparagine	Amino acids and derivatives	Amino acids and derivatives	4033-40-3	3	128264	352193	131801	1.30635e+06	1.16422e+06	1.22755e+06	1.83381e+06	1.76878e+06	1.77635e+06	872641	940997	1.05194e+06	-	-	-	-	-	-	-	-	-	-	-	-	1.25595	0.0011429	8.78541	3.13511	up	1.20358	0.00098411	6.04012	2.59458	up
C26H42N10O8	Tyr-Glu-Arg-Arg	Amino acids and derivatives	Amino acids and derivatives	-	3	926994	2.35393e+06	1.52111e+06	1.15816e+06	1.20611e+06	1.29427e+06	398612	419344	430355	460697	455929	481860	-	-	-	-	-	-	-	1.22021	0.00156997	0.341204	-1.55129	down	1.21	0.103379	0.259955	-1.94367	down	-	-	-	-	-
C26H26O12	3,5-O-Dicaffeoylquinic Acid Methyl Ester	Phenolic acids	Phenolic acids	159934-13-1	3	2.66129e+06	2.81893e+06	1.72962e+06	1.97257e+06	1.91833e+06	2.17455e+06	1.06362e+06	1.01805e+06	950735	1.14834e+06	1.07257e+06	1.08517e+06	-	-	-	-	-	-	-	1.21187	0.00209471	0.499947	-1.00015	down	1.22599	0.0535075	0.420592	-1.24951	down	-	-	-	-	-
C11H15N5O3S	5'-Deoxy-5'-(methylthio)adenosine	Nucleotides and derivatives	Nucleotides and derivatives	2457-80-9	1	5.25722e+07	4.62577e+07	5.39648e+07	1.55016e+07	1.56458e+07	1.5214e+07	1.51137e+07	1.43793e+07	1.48764e+07	1.54213e+07	1.51899e+07	1.68263e+07	C00170	ko00270,ko00908,ko01100	-	-	-	-	-	-	-	-	-	-	1.30487	0.00402536	0.290386	-1.78396	down	1.267	0.00434656	0.303423	-1.7206	down
C18H39NO3	4-Hydroxysphinganine	Lipids	Sphingolipids	554-62-1	3	723311	600499	666363	205340	229789	219993	484590	458783	407179	401495	386876	432052	C12144	ko00600,ko01100	-	-	-	-	-	1.20558	0.00565261	2.06152	1.04371	up	-	-	-	-	-	1.26259	0.00487565	0.329179	-1.60306	down
C20H30O7	Cinncassiol A	Terpenoids	Sesquiterpenoids	73599-11-8	3	39142.2	128923	59992.4	195565	197163	231615	106280	96337.4	87106.3	126132	129666	129274	C17645	-	-	-	-	-	-	1.19937	0.00406148	0.464046	-1.10766	down	-	-	-	-	-	1.08076	0.0255076	2.73765	1.45294	up
C20H26O6	7-(4-Hydroxy-3-methoxyphenyl)-1-(3,4-dihydroxyphenyl)-hepane-3,5-diol	Others	Others	-	2	713258	988287	702334	1.13994e+06	1.07803e+06	1.05829e+06	3.0612e+06	3.50224e+06	3.106e+06	540612	327045	195066	-	-	1.25486	0.000147485	0.109905	-3.18567	down	1.21878	0.00344488	2.95136	1.56138	up	1.28992	0.000315478	4.02243	2.00807	up	-	-	-	-	-
C34H30O15	3,4,5-Tricaffeoylquinic acid	Phenolic acids	Phenolic acids	86632-03-3	3	185901	49202.5	128565	1.10219e+06	1.15643e+06	1.07524e+06	384389	380660	367835	245648	194406	230860	-	-	-	-	-	-	-	1.22268	0.000683247	0.339811	-1.5572	down	1.11646	0.021645	3.11515	1.6393	up	1.20029	0.000122239	9.16731	3.1965	up
C31H46O2	Phylloquinone (Vitamin K1)	Others	Vitamin	84-80-0	3	247832	320912	352642	152166	151316	154198	87154	91405.1	74292.2	95339.7	87246.9	96132	-	-	-	-	-	-	-	-	-	-	-	-	1.28765	0.016736	0.274425	-1.86552	down	1.21662	0.0379303	0.49673	-1.00947	down
C19H26O12	1´-O-Benzoylsucrose	Others	Saccharides	-	2	6.44537e+06	4.56284e+06	1.46154e+06	2.00387e+06	1.80952e+06	1.9156e+06	902645	1.01151e+06	987217	7.48784e+06	7.22617e+06	8.04734e+06	-	-	1.29552	0.00111878	7.84502	2.97178	up	-	-	-	-	-	1.07127	0.159289	0.232673	-2.10362	down	-	-	-	-	-
C22H34N8O6	Asn-Phe-Ala-Arg	Amino acids and derivatives	Amino acids and derivatives	-	3	5.04151e+06	2.15357e+06	2.12428e+06	5.58005e+07	5.79694e+07	5.6047e+07	2.21188e+07	2.38318e+07	2.23961e+07	2.05431e+07	2.05228e+07	2.22394e+07	-	-	-	-	-	-	-	1.22191	4.764e-06	0.402473	-1.31304	down	1.26494	0.000313487	7.33384	2.87457	up	1.24806	4.30399e-06	18.222	4.18761	up
C21H36O4	2-α-Linolenoyl-glycerol*	Lipids	Glycerol ester	55268-58-1	1	1.04544e+07	6.7536e+06	4.08962e+06	2.35556e+06	2.5288e+06	2.37269e+06	992783	1.29242e+06	1.02238e+06	1.13824e+06	1.0912e+06	1.07888e+06	-	-	-	-	-	-	-	1.19617	0.000915725	0.455775	-1.13361	down	1.2472	0.0826871	0.155303	-2.68684	down	1.11096	0.12649	0.340745	-1.55324	down
C18H14O6	2-(7-Dihydroxyl)-benzofuranyl-ferulic acid	Phenolic acids	Phenolic acids	-	3	396570	356280	533018	119383	249867	226139	121983	124962	136722	104910	100696	114034	-	-	-	-	-	-	-	-	-	-	-	-	1.2821	0.0294556	0.298372	-1.74482	down	1.07092	0.0295521	0.463025	-1.11084	down
C11H19N3O6S	S-(Methyl)glutathione	Amino acids and derivatives	Amino acids and derivatives	2922-56-7	3	652096	1.01923e+06	1.05858e+06	2.22214e+06	1.86906e+06	1.77874e+06	977012	1.08713e+06	1.27897e+06	1.26857e+06	1.70315e+06	1.73001e+06	C11347	-	-	-	-	-	-	-	-	-	-	-	-	-	-	-	-	1.16406	0.00505262	2.15023	1.10449	up
C12H19N3O7	Asp-Pro-Ser	Amino acids and derivatives	Amino acids and derivatives	-	3	5.07332e+06	4.60411e+06	4.60377e+06	7.74642e+07	7.69914e+07	7.91814e+07	3.29117e+07	3.766e+07	3.19683e+07	3.04325e+07	2.91766e+07	3.31993e+07	-	-	-	-	-	-	-	1.21502	0.000479934	0.438886	-1.18808	down	1.30743	0.00335589	7.18007	2.844	up	1.26968	3.6282e-05	16.3598	4.03208	up
C18H16O7	Usnic acid	Phenolic acids	Phenolic acids	125-46-2	1	37321.7	33957.7	37661.5	1.32728e+06	1.36014e+06	1.33161e+06	210734	228492	195441	14674.5	9396.22	5143.88	C10101	-	1.27283	0.00112465	0.0460313	-4.44124	down	1.22261	1.55846e-07	0.157916	-2.66278	down	1.30722	0.0026161	5.8258	2.54246	up	1.26947	5.09042e-05	36.8919	5.20523	up
C6H14N4O2	L-Arginine	Amino acids and derivatives	Amino acids and derivatives	74-79-3	1	335794	1.69147e+06	437002	4.3161e+06	4.36313e+06	4.51371e+06	6.76739e+06	4.56917e+06	6.95233e+06	3.63539e+06	3.47984e+06	3.71849e+06	C00062	ko00220,ko00261,ko00330,ko00470,ko00970,ko01100,ko01110,ko01230,ko02010	-	-	-	-	-	-	-	-	-	-	1.18688	0.00792525	7.42164	2.89174	up	1.13423	0.0132816	5.3537	2.42054	up
C6H12O6	Inositol	Others	Saccharides	87-89-8	1	2.01644e+06	991525	2.49798e+06	2.27267e+06	2.25954e+06	2.38578e+06	920276	915654	923884	1.09579e+06	1.08067e+06	970157	C00137	ko00052,ko00053,ko00562,ko01100,ko01110,ko01250,ko02010,ko04070	-	-	-	-	-	1.22287	0.000804133	0.398933	-1.32578	down	-	-	-	-	-	-	-	-	-	-
C18H34O4	12,13-DHOME; (9Z)-12,13-Dihydroxyoctadec-9-enoic acid	Lipids	Free fatty acids	263399-35-5	3	53472.8	53370.1	45142.9	235356	234465	232944	141931	149747	134666	126976	136482	135679	C14829	ko00591	-	-	-	-	-	-	-	-	-	-	1.30006	0.000185744	2.80516	1.48808	up	1.26783	9.77862e-05	4.62389	2.20911	up
C9H10O2	p-Coumaryl alcohol	Phenolic acids	Phenolic acids	3690-05-9	3	282329	995776	241828	376580	381169	354130	218673	240007	225833	529077	580022	486289	C02646	ko00940,ko01100,ko01110	1.28486	0.00574	2.33069	1.22076	up	-	-	-	-	-	-	-	-	-	-	-	-	-	-	-
C7H16N4O2	Arginine methyl ester	Amino acids and derivatives	Amino acids and derivatives	-	1	1.26617e+06	3.70974e+06	1.22484e+06	1.16823e+07	1.18889e+07	1.12197e+07	1.47932e+07	1.51344e+07	1.56986e+07	8.63292e+06	8.36879e+06	8.15846e+06	-	-	-	-	-	-	-	-	-	-	-	-	1.23749	0.00187892	7.35817	2.87935	up	1.18808	0.00518786	5.61076	2.4882	up
C18H32N4O8	Ile-Ser-Val-Asp	Amino acids and derivatives	Amino acids and derivatives	-	3	1.5501e+07	8.11215e+06	1.89194e+07	241996	241970	230128	238171	244637	233219	989065	912766	906208	-	-	1.29559	0.00125501	3.9217	1.97148	up	-	-	-	-	-	1.29856	0.0485669	0.0168348	-5.89241	down	1.26179	0.0485627	0.0167894	-5.89631	down
C18H32O4	5S,8R-DiHODE; (5S,8R,9Z,12Z)-5,8-Dihydroxyoctadeca-9,12-dienoate	Lipids	Free fatty acids	-	3	463376	499308	404269	206909	242529	218599	218139	183945	179756	369818	335782	360062	C20186	ko00591	-	-	-	-	-	-	-	-	-	-	1.28256	0.00455129	0.425648	-1.23227	down	1.23824	0.00737357	0.488705	-1.03296	down
C18H18O6	3-Hydroxy-4',5,7-Trimethoxyflavanone	Flavonoids	Flavanonols	76792-94-4	2	7.42432e+06	374982	1.82724e+06	9.01215e+06	8.70781e+06	9.25237e+06	3.98139e+06	4.01156e+06	3.84697e+06	7.30541e+06	7.79232e+06	8.30329e+06	-	-	-	-	-	-	-	1.2223	0.000356459	0.438965	-1.18782	down	-	-	-	-	-	-	-	-	-	-
C20H26O4	3,5-dihydroxy-1-(4-hydroxy-3-methoxyphenyl)-7-phenylheptane	Others	Others	-	2	3.60165e+07	2.23878e+06	3.27622e+07	1.05112e+07	9.85876e+06	1.08373e+07	4.16586e+06	4.3155e+06	4.17889e+06	8.73331e+06	9.92846e+06	1.00449e+07	-	-	1.28843	0.0055854	2.26747	1.18108	up	1.22111	0.00170304	0.405683	-1.30158	down	-	-	-	-	-	-	-	-	-	-
C23H22O11	Apigenin-7-O-(6''-acetyl)glucoside	Flavonoids	Flavones	72741-92-5	3	389039	71035.4	418207	182856	182482	177739	83899.4	78790.5	91852.3	186189	212618	182879	-	-	1.28088	0.00300512	2.28522	1.19233	up	1.21434	0.000326075	0.468704	-1.09325	down	-	-	-	-	-	-	-	-	-	-
C18H19NO4	Acetyl-Caranine	Alkaloids	Alkaloids	-	3	1.34046e+06	1.30156e+06	1.09453e+06	1.65484e+07	1.74899e+07	1.73434e+07	4.71192e+06	4.9112e+06	4.83428e+06	3.81668e+06	3.66354e+06	3.95208e+06	-	-	-	-	-	-	-	1.22309	0.000363462	0.281373	-1.82944	down	1.30407	6.1241e-06	3.86919	1.95203	up	1.26914	0.000149314	13.7511	3.78147	up
C8H15NO2	Tranexamic Acid	Organic acids	Organic acids	1197-18-8	3	221001	788148	262895	1.82255e+06	2.23069e+06	2.15036e+06	3.13284e+06	3.00549e+06	3.217e+06	1.56815e+06	1.54586e+06	1.57652e+06	-	-	-	-	-	-	-	-	-	-	-	-	1.22642	0.00213557	7.35457	2.87864	up	1.1584	0.00280058	4.87688	2.28596	up
C20H20O7	4-ketopinoresinol	Lignans and Coumarins	Lignans	66288-89-9	1	382027	140271	84961.4	5.24551e+06	4.98505e+06	2.72009e+06	208047	507934	478707	197429	583933	1.29435e+06	-	-	-	-	-	-	-	1.17263	0.0377801	0.0922492	-3.43832	down	-	-	-	-	-	1.21763	0.0345079	21.3264	4.41457	up
C20H26O3	4-Oxoretinoic acid	Organic acids	Organic acids	64907-22-8	3	61806.6	57715.5	144732	213316	230287	223728	27663	27043.8	35561.6	129597	145856	122732	C16678	ko01100	1.28492	0.00157249	4.41113	2.14115	up	1.21817	4.02332e-05	0.135268	-2.88611	down	1.11268	0.176304	0.341597	-1.54963	down	1.08882	0.0383008	2.52534	1.33648	up
C7H6O3	2,5-Dihydroxybenzaldehyde	Phenolic acids	Phenolic acids	1194-98-5	3	1.14985e+06	1.49212e+06	1.19729e+06	2.73623e+06	2.81673e+06	2.74456e+06	1.62368e+06	1.76184e+06	1.71635e+06	1.62988e+06	1.9621e+06	1.81168e+06	C05585	ko00350,ko01100	-	-	-	-	-	-	-	-	-	-	-	-	-	-	-	1.24529	0.00351471	2.16123	1.11185	up
C18H32O3	9(10)-EpOME;(9R,10S)-(12Z)-9,10-Epoxyoctadecenoic acid	Lipids	Free fatty acids	16833-56-0	1	533488	556421	613339	97629.1	97699	92139.9	77249.5	92888.2	77461.4	167537	181561	165990	C14825	ko00591,ko01100	1.27562	0.00024259	2.08033	1.05681	up	-	-	-	-	-	1.30626	0.00160897	0.145369	-2.78221	down	1.26894	0.00239688	0.168776	-2.56682	down
C23H22O13	Quercetin-3-O-(6''-O-acetyl)galactoside	Flavonoids	Flavonols	-	3	15879.8	32065.3	23583.2	6757.49	4832.41	11796.8	6198.41	1858.04	3279.63	8448.04	11335.7	13209.5	-	-	1.0941	0.0188186	2.91047	1.54125	up	-	-	-	-	-	1.20767	0.0421053	0.158484	-2.65759	down	1.09937	0.0579328	0.326957	-1.61283	down
C9H8O	Cinnamaldehyde	Phenolic acids	Phenolic acids	14371-10-9	3	2.29104e+06	1.87148e+06	1.24988e+06	2.67822e+06	2.39608e+06	2.51863e+06	1.00607e+06	960053	1.73599e+06	1.89915e+06	800696	2.00136e+06	C00903	ko00940,ko01100,ko01110	-	-	-	-	-	1.08636	0.0263351	0.487574	-1.03631	down	-	-	-	-	-	-	-	-	-	-
C6H12O7	Gluconic acid	Others	Saccharides	526-95-4	1	1.63465e+07	8.34668e+06	8.76346e+06	1.37964e+07	1.34745e+07	1.32431e+07	6.64132e+06	7.67875e+06	7.96781e+06	22151202	2.17696e+07	2.08099e+07	C00257	ko00030,ko01100,ko01110,ko01200	1.28918	1.53185e-05	2.9043	1.53819	up	-	-	-	-	-	-	-	-	-	-	-	-	-	-	-
C6H12O6	D-Fructose	Others	Saccharides	57-48-7	1	2.15077e+06	1.15224e+06	2.75604e+06	2.44041e+06	2.48812e+06	2.56567e+06	1.10007e+06	1.08018e+06	1.05406e+06	1.19387e+06	1.15468e+06	1.23654e+06	C05003	-	-	-	-	-	-	1.22275	0.000166485	0.431575	-1.21232	down	-	-	-	-	-	-	-	-	-	-
C18H32O4	9-Hydroperoxy-9Z,11E-Octadecadienoic Acid	Lipids	Free fatty acids	-	1	98973	109785	101377	1.08662e+06	1.13795e+06	1.11569e+06	749381	821129	752200	663580	658642	692741	-	-	-	-	-	-	-	-	-	-	-	-	1.30808	0.0010096	7.48935	2.90484	up	1.2697	0.000114792	10.7703	3.42899	up
C9H10O4	Syringaldehyde; 4-Hydroxy-3,5-Dimethoxybenzaldehyde	Phenolic acids	Phenolic acids	134-96-3	3	195398	107388	120081	309904	273639	265480	202781	196976	170529	135027	166472	150382	-	-	-	-	-	-	-	-	-	-	-	-	-	-	-	-	-	1.12726	0.0199481	2.00778	1.0056	up
C7H16N4O2	Homoarginine	Amino acids and derivatives	Amino acids and derivatives	156-86-5	1	5.37222e+06	1.10063e+07	5.02619e+06	2.86999e+07	3.12596e+07	3.04419e+07	3.96796e+07	4.11513e+07	4.02392e+07	2.31496e+07	2.21699e+07	2.23317e+07	C01924	-	-	-	-	-	-	-	-	-	-	-	1.25976	0.00233818	5.65624	2.49984	up	1.20878	0.00298679	4.22344	2.07842	up
C33H56O14	Gingerglycolipid A	Lipids	Glycerol ester	145937-22-0	1	218546	132367	350447	38516.9	40151.4	35524.1	24157.2	24873.1	24311	44583	40584.5	42177.3	-	-	-	-	-	-	-	-	-	-	-	-	1.26761	0.0807953	0.10457	-3.25746	down	1.21286	0.0908227	0.162816	-2.61869	down
C12H22N4O6S1	Met-Asn-Ser	Amino acids and derivatives	Amino acids and derivatives	-	3	6.47884e+06	4.71032e+06	4.81355e+06	1.00626e+07	1.12978e+07	1.0847e+07	4.24615e+06	4.66469e+06	4.05566e+06	8.24064e+06	8.00521e+06	8.17171e+06	-	-	-	-	-	-	-	1.21598	0.000609238	0.402595	-1.3126	down	-	-	-	-	-	1.21517	0.00266255	2.01262	1.00907	up
C14H17N3O4	Ser-Trp	Amino acids and derivatives	Amino acids and derivatives	94421-70-2	3	347793	511854	323530	124631	194360	160634	340625	306917	326965	284548	334963	304035	-	-	-	-	-	-	-	1.14945	0.0058221	2.0318	1.02276	up	-	-	-	-	-	1.16378	0.0462205	0.405371	-1.30269	down
C15H24O2	3,5-Di-tert-butyl-4-hydroxybenzyl alcohol	Phenolic acids	Phenolic acids	88-26-6	3	3.14458e+07	3.88897e+07	2.96177e+07	5.46214e+07	5.69172e+07	5.74317e+07	2.25343e+07	2.02749e+07	2.36217e+07	3.85665e+07	3.72405e+07	4.62255e+07	-	-	-	-	-	-	-	1.21697	1.4897e-05	0.393152	-1.34684	down	-	-	-	-	-	-	-	-	-	-
C15H30N4O4	Lys-Ile-Ala	Amino acids and derivatives	Amino acids and derivatives	-	3	3.03273e+07	3.26991e+06	3.29532e+07	1.51547e+07	1.60648e+07	1.54723e+07	2.77646e+06	2.33783e+06	2.75572e+06	9.99102e+06	9.58264e+06	1.01875e+07	-	-	1.29181	8.80278e-06	3.78159	1.91899	up	1.22099	2.36631e-05	0.168552	-2.56873	down	-	-	-	-	-	-	-	-	-	-
C18H32O4	13-Hydroperoxy-9Z,11E-octadecadienoic acid	Lipids	Free fatty acids	23017-93-8	3	139111	103336	100232	2.22125e+06	2.36947e+06	2.28837e+06	1.56839e+06	1.67511e+06	1.5756e+06	1.30752e+06	1.30354e+06	1.44437e+06	-	-	-	-	-	-	-	-	-	-	-	-	1.3061	0.00012942	14.063	3.81383	up	1.26715	0.000143585	20.0744	4.32729	up
C18H32O4	7S,8S-DiHODE; (9Z,12Z)-(7S,8S)-Dihydroxyoctadeca-9,12-dienoic acid	Lipids	Free fatty acids	143288-65-7	3	139111	103336	100232	2.22125e+06	2.36947e+06	2.28837e+06	1.56839e+06	1.67511e+06	1.5756e+06	1.30752e+06	1.30354e+06	1.44437e+06	C07354	ko00591	-	-	-	-	-	-	-	-	-	-	1.3061	0.00012942	14.063	3.81383	up	1.26715	0.000143585	20.0744	4.32729	up
C7H6O3	4-Hydroxybenzoic acid	Phenolic acids	Phenolic acids	99-96-7	3	1.48488e+06	1.51717e+06	1.61857e+06	3.0314e+06	3.05866e+06	3.26457e+06	1.92899e+06	1.77953e+06	1.98149e+06	1.82313e+06	2.07343e+06	2.01894e+06	C00156	ko00130,ko00790,ko01100,ko01110,ko01240	-	-	-	-	-	-	-	-	-	-	-	-	-	-	-	1.26256	0.000268458	2.02454	1.01759	up
C23H42NO7P	LysoPE 18:3	Lipids	LPE	-	3	652423	934640	1.17035e+06	277255	257402	254543	361851	369615	346225	357425	338783	394457	-	-	-	-	-	-	-	-	-	-	-	-	1.22873	0.0643452	0.390835	-1.35537	down	1.22507	0.0480359	0.28621	-1.80485	down
C4H7NO4	L-Aspartic Acid	Amino acids and derivatives	Amino acids and derivatives	56-84-8	1	4.65485e+07	3.40283e+07	2.64314e+07	8.30317e+07	8.70923e+07	8.66424e+07	5.66878e+07	6.09085e+07	6.10203e+07	7.96883e+07	7.98205e+07	7.9021e+07	C00049	ko00220,ko00250,ko00260,ko00261,ko00270,ko00300,ko00340,ko00410,ko00460,ko00470,ko00710,ko00760,ko00770,ko00970,ko00999,ko01100,ko01110,ko01200,ko01210,ko01230,ko01240,ko02010	-	-	-	-	-	-	-	-	-	-	-	-	-	-	-	1.19693	0.0107066	2.3995	1.26273	up
C18H34O5	9,10,13-Trihydroxy-11-Octadecenoic Acid	Lipids	Free fatty acids	29907-57-1	1	1.41073e+06	1.84502e+06	1.68136e+06	1.28073e+06	1.32798e+06	1.02142e+06	1.25169e+06	1.27933e+06	1.34821e+06	7.2059e+06	6.58503e+06	7.37319e+06	C14835	ko00591	1.29539	0.00151682	5.45575	2.44778	up	-	-	-	-	-	-	-	-	-	-	-	-	-	-	-
C23H42NO7P	LysoPE 18:3(2n isomer)	Lipids	LPE	-	3	654327	1.01124e+06	1.18714e+06	276551	298509	264347	357555	386703	348600	352386	370298	393256	-	-	-	-	-	-	-	-	-	-	-	-	1.22398	0.0638079	0.383094	-1.38423	down	1.21743	0.049927	0.294249	-1.76489	down
C20H20O6	(-)-dihydrosesamin	Lignans and Coumarins	Lignans	-	1	4.13748e+06	4.78353e+06	3.2071e+06	4.83062e+06	5.16933e+06	4.28942e+06	2.13146e+06	2.37456e+06	2.10388e+06	3.89544e+06	3.6482e+06	3.75059e+06	-	-	-	-	-	-	-	1.20627	0.00550612	0.462575	-1.11224	down	-	-	-	-	-	-	-	-	-	-
C19H32N8O11	Gly-Arg-Ser-Asp-Asp	Amino acids and derivatives	Amino acids and derivatives	-	3	7.34591e+06	968680	1.68045e+06	2.01499e+07	1.57933e+07	1.86734e+07	2.14129e+07	2.163e+07	2.19481e+07	6.1222e+06	5.69709e+06	6.16971e+06	-	-	1.29572	2.20426e-07	0.276792	-1.85312	down	-	-	-	-	-	1.15792	0.01153	6.50232	2.70095	up	1.09397	0.00580025	5.46438	2.45006	up
C16H18O8	1-O-p-Coumaroylquinic acid	Phenolic acids	Phenolic acids	-	2	33018	9566.14	39150.3	643958	617191	653650	359960	377559	385979	13620.1	22245.2	17527	-	-	1.29142	0.000140869	0.0475232	-4.39522	down	-	-	-	-	-	1.24922	1.013e-05	13.7457	3.78091	up	1.22288	2.48102e-06	23.4271	4.5501	up
C8H8O4	Vanillic acid	Phenolic acids	Phenolic acids	121-34-6	3	314877	242277	323204	705387	695152	705153	524302	580037	538366	355450	357095	334165	C06672	-	-	-	-	-	-	-	-	-	-	-	-	-	-	-	-	1.24006	0.00346421	2.39186	1.25813	up
C7H14NO2+	D-Proline betaine	Amino acids and derivatives	Amino acids and derivatives	1195-94-4	3	2.20751e+06	1.83371e+06	2.87465e+06	9.3504e+06	9.70508e+06	9.52993e+06	1.48244e+07	1.50549e+07	1.37616e+07	6.6622e+06	6.36944e+06	6.17868e+06	C21514	-	1.29197	0.000893147	0.440191	-1.1838	down	-	-	-	-	-	1.29657	2.89473e-05	6.31025	2.6577	up	1.24613	0.000675908	4.1333	2.0473	up
C20H18O5	Cagayanone A	Lignans and Coumarins	Lignans	-	3	3.05819e+06	3.63578e+06	2.46286e+06	3.71382e+06	3814806	2.98501e+06	1.27986e+06	1.50949e+06	1.40644e+06	2.61882e+06	2.49161e+06	2.52994e+06	-	-	-	-	-	-	-	1.20007	0.0111978	0.399081	-1.32525	down	1.24913	0.0352859	0.458214	-1.12591	down	-	-	-	-	-
C20H20O6	Horsfieldin	Lignans and Coumarins	Lignans	-	3	4.25e+06	4.58903e+06	3.20415e+06	4.933e+06	5.10442e+06	4.34982e+06	2.11629e+06	2.31899e+06	2.08476e+06	3.81522e+06	4.12635e+06	3.63797e+06	-	-	-	-	-	-	-	1.21079	0.00413932	0.453182	-1.14184	down	-	-	-	-	-	-	-	-	-	-
C9H16O4	Azelaic acid	Organic acids	Organic acids	123-99-9	1	3.84324e+06	3.86363e+06	4.28897e+06	2.36573e+06	1.9734e+06	2.07292e+06	1.65153e+06	2.23639e+06	1.5926e+06	2.70885e+06	2.48781e+06	2.69276e+06	C08261	-	-	-	-	-	-	-	-	-	-	-	1.26018	0.00156812	0.456868	-1.13015	down	-	-	-	-	-
CH4O3S	Methanesulfonic acid	Organic acids	Organic acids	75-75-2	3	331281	144044	171701	624725	601508	690697	193113	175458	165811	301400	323426	303432	C11145	ko00920,ko01100	-	-	-	-	-	1.21876	0.00172414	0.27877	-1.84285	down	-	-	-	-	-	1.15985	0.00872632	2.96268	1.5669	up
C9H16N4O5	Gly-Gln-Gly	Amino acids and derivatives	Amino acids and derivatives	2650-69-3	3	1.46288e+06	1.08268e+06	817439	1.14718e+07	1.18356e+07	1.19529e+07	5.33982e+06	6.81282e+06	6.66327e+06	6.72396e+06	6.26517e+06	6.88843e+06	-	-	-	-	-	-	-	-	-	-	-	-	1.28194	0.00348118	5.59498	2.48413	up	1.25903	2.82628e-06	10.4847	3.39022	up
C12H24O2	Dodecanoic acid (Lauric acid)	Lipids	Free fatty acids	143-07-7	3	351557	401574	393524	218461	233627	220318	198895	202672	170385	159623	156133	157040	C02679	ko00061,ko01100,ko01110	-	-	-	-	-	-	-	-	-	-	1.28554	0.00102021	0.4988	-1.00347	down	-	-	-	-	-
C19H18N2O2	N-Cinnamoylserotonin	Alkaloids	Plumerane	-	3	52635.5	70369.4	71465.8	5.44465e+06	5.43512e+06	5.44852e+06	471957	462700	467173	430031	410128	449494	-	-	-	-	-	-	-	1.22379	1.00552e-10	0.0858529	-3.54199	down	1.30217	2.30771e-05	7.20844	2.84969	up	1.26848	4.5022e-10	83.9627	6.39168	up
C16H22O10	1-O-(3,4,5-Trimethoxybenzoyl)-B-D-Glucopyranoside	Phenolic acids	Phenolic acids	-	2	82200.1	591969	131181	1.09736e+06	1.00348e+06	967140	121263	138850	133005	360352	369972	392872	-	-	1.29156	0.000173782	2.85715	1.51457	up	1.22196	0.00161253	0.128136	-2.96425	down	-	-	-	-	-	1.0465	0.0372207	3.8095	1.9296	up
C21H30O2	Progesterone	Terpenoids	Ditepenoids	57-83-0	3	1.0631e+06	846551	1.41461e+06	3.18829e+06	3.18846e+06	2.07608e+06	611821	864720	1.80878e+06	527884	719120	741576	C00410	ko01100	-	-	-	-	-	1.00839	0.0295533	0.388665	-1.3634	down	-	-	-	-	-	1.1574	0.0286684	2.54277	1.3464	up
C15H18O9	6-O-Caffeoyl-D-glucose*	Phenolic acids	Phenolic acids	-	2	903846	928319	586885	1.98798e+06	1.90316e+06	1.95032e+06	809126	980814	950174	576726	638748	671617	-	-	-	-	-	-	-	1.20779	0.000555568	0.46908	-1.09209	down	-	-	-	-	-	1.2113	0.00692974	2.41478	1.27189	up
C21H30O3	20,21-Dihydroxypregna-4,6-dien-3-one	Steroids	Steroid	-	2	4.06229e+06	914636	6.7146e+06	1.60885e+06	1.5046e+06	1.68197e+06	264544	316641	340313	2.23912e+06	2.31815e+06	2.36297e+06	-	-	1.29314	8.04737e-06	7.50977	2.90877	up	1.21728	0.000330756	0.192162	-2.37961	down	1.15329	0.165506	0.0788176	-3.66534	down	-	-	-	-	-
C13H23N3O8	Glu-Thr-Thr	Amino acids and derivatives	Amino acids and derivatives	-	3	2.85217e+07	25950095	2.34716e+07	6.05674e+07	6.24957e+07	6.43196e+07	2.46516e+07	2.69376e+07	2.48504e+07	2.17106e+07	2.18018e+07	2.24486e+07	-	-	-	-	-	-	-	1.22061	2.87512e-05	0.407933	-1.2936	down	-	-	-	-	-	1.26022	6.60346e-05	2.40408	1.26549	up
C55H86O24	escin Ib	Steroids	Steroid	26339-90-2	3	78909.4	109922	81050.7	1.22232e+06	2.44316e+06	1.25597e+06	1.14392e+07	1.59652e+07	1.26385e+07	570630	744845	758977	C08921	-	1.29159	0.011128	0.0518058	-4.27074	down	1.19226	0.00863031	8.13639	3.02439	up	1.30696	0.0102637	148.372	7.21307	up	1.25181	0.0608853	18.2356	4.18868	up
C23H22O10	O-p-Coumaroyl-O-salicyloyl quinic acid	Phenolic acids	Phenolic acids	-	3	123232	56642.8	114290	180510	196076	205926	21521.3	25629.9	19182	61921.6	40080	37539.7	-	-	1.16465	0.0800669	2.10364	1.07289	up	1.21984	0.00104902	0.113874	-3.13449	down	1.22883	0.0667567	0.225496	-2.14883	down	-	-	-	-	-
C13H23N3O6	Ile-Glu-Gly	Amino acids and derivatives	Amino acids and derivatives	-	3	467987	300181	345517	4.02034e+07	4.25046e+07	4.14357e+07	9.32475e+06	1.07325e+07	1.03802e+07	6.61633e+06	6.57911e+06	7.40913e+06	-	-	-	-	-	-	-	1.22107	1.21308e-05	0.245179	-2.02809	down	1.30577	0.00164759	27.3304	4.77244	up	1.26787	0.000244223	111.471	6.80053	up
C5H5N5O	Isoguanine	Nucleotides and derivatives	Nucleotides and derivatives	3373-53-3	3	1.90914e+06	1.44754e+06	2.57109e+06	1.14234e+06	755846	768733	853823	802788	793583	997918	1.20337e+06	1.07422e+06	-	-	-	-	-	-	-	-	-	-	-	-	1.21879	0.0703456	0.413342	-1.27459	down	1.12287	0.0643755	0.449903	-1.15232	down
C18H34O3	3-Oxooctadecanoic acid	Organic acids	Organic acids	-	3	76442.1	105028	77188.9	15775.1	20586.5	44039	15596.9	15119.8	15932.3	43915.7	42234.9	38040	-	-	1.29137	0.00398616	2.66223	1.41264	up	-	-	-	-	-	1.30051	0.0172108	0.180349	-2.47113	down	1.12695	0.00993825	0.310836	-1.68577	down
C23H30N6O8	Ala-His-Tyr-Glu	Amino acids and derivatives	Amino acids and derivatives	-	3	2.35726e+06	3.7089e+06	5.94552e+06	2.19796e+06	1.9739e+06	1.93741e+06	835463	1.68742e+06	1.34889e+06	1.05083e+06	1.12104e+06	1.01997e+06	-	-	-	-	-	-	-	-	-	-	-	-	1.12123	0.115165	0.322334	-1.63337	down	-	-	-	-	-
C20H28O	9-cis-Retinal	Others	Aldehyde compounds	514-85-2	3	8.07369e+07	4.49598e+06	7.08882e+07	7.01034e+07	7.00806e+07	7.43727e+07	3.1728e+07	3.24661e+07	3.19708e+07	1.22276e+07	1.32446e+07	1.50702e+07	C16681	ko01100	1.28429	0.00112212	0.421593	-1.24608	down	1.22213	0.00104513	0.448203	-1.15778	down	-	-	-	-	-	-	-	-	-	-
C3H9N3O2	4-methyl-1,5,2,3-dioxadiazinan-2-amine	Nucleotides and derivatives	Nucleotides and derivatives	-	2	1.47032e+06	1.28269e+06	1.53576e+06	5.29472e+06	5.28022e+06	5.1179e+06	784801	770418	772058	1.24069e+06	1.22765e+06	1.28591e+06	-	-	-	-	-	-	-	1.22372	0.000148035	0.148302	-2.75339	down	-	-	-	-	-	1.26409	5.02979e-06	3.65904	1.87147	up
C13H23N3O7	Asp-Ser-Ile	Amino acids and derivatives	Amino acids and derivatives	-	3	694256	467428	257795	1.44852e+07	1.6645e+07	1.42201e+07	6.0035e+06	7.30674e+06	6.22954e+06	5.66291e+06	5.88618e+06	6.08563e+06	-	-	-	-	-	-	-	1.20362	0.00211566	0.430864	-1.2147	down	1.28073	0.00225341	13.7655	3.78298	up	1.25518	0.00220285	31.9485	4.99768	up
C7H16N4O2	N-Monomethyl-L-arginine	Amino acids and derivatives	Amino acids and derivatives	17035-90-4	1	1.39098e+06	3.9694e+06	1.22567e+06	11471827	1.11878e+07	1.13135e+07	1.48813e+07	1.47721e+07	1.56021e+07	8.62159e+06	8.19469e+06	7.83021e+06	C03884	-	-	-	-	-	-	-	-	-	-	-	1.23055	0.00264231	6.87141	2.78061	up	1.17805	0.00888802	5.15835	2.36691	up
C11H21N5O5	Glu-Arg	Amino acids and derivatives	Amino acids and derivatives	7219-59-2	3	626902	1.8507e+06	535542	1.12365e+07	1.20032e+07	1.0636e+07	2.82892e+06	3.03636e+06	3.62284e+06	1.78646e+06	1.86771e+06	1.61265e+06	-	-	-	-	-	-	-	1.21308	0.000232861	0.280086	-1.83606	down	1.11567	0.019228	3.14892	1.65486	up	1.21963	6.13893e-05	11.2427	3.49091	up
C23H24O13	Syringetin-3-O-glucoside	Flavonoids	Flavonols	40039-49-4	3	1.66253e+07	7055640	8.85294e+06	4.48649e+06	4.36956e+06	4.57832e+06	1.47841e+06	1.75467e+06	1.78112e+06	2.46699e+06	2.65012e+06	2.84568e+06	-	-	-	-	-	-	-	1.21386	6.62765e-05	0.373237	-1.42184	down	1.25495	0.0888481	0.154122	-2.69785	down	1.07542	0.162385	0.412934	-1.27602	down
C13H17N3O4	Asn-Phe	Amino acids and derivatives	Amino acids and derivatives	-	3	658720	417760	391633	8.26039e+06	8.23805e+06	8.69034e+06	3.7546e+06	4.256e+06	3.65102e+06	4.07282e+06	4.13323e+06	4.23817e+06	-	-	-	-	-	-	-	1.21407	6.74083e-05	0.462969	-1.11101	down	1.29405	0.000713228	7.94327	2.98973	up	1.26232	1.21865e-05	17.1572	4.10075	up
C15H21N5O4	Riboprine	Nucleotides and derivatives	Nucleotides and derivatives	7724-76-7	3	964570	1.08752e+06	2.08905e+06	370994	420348	419239	307314	400275	303141	450174	433632	512013	C16427	ko00908,ko01110	-	-	-	-	-	-	-	-	-	-	1.22683	0.0982573	0.244071	-2.03463	down	1.17875	0.110864	0.292331	-1.77433	down
C20H20N2O3	N-Feruloyltryptamine	Alkaloids	Plumerane	53905-13-8	1	2.63628e+06	2.20069e+06	1.73369e+06	3.69715e+07	3.78084e+07	3.66604e+07	9.06745e+06	9.93704e+06	9.18395e+06	7.04823e+06	7.04378e+06	7.9563e+06	-	-	-	-	-	-	-	1.22272	6.74062e-07	0.252946	-1.9831	down	1.29214	4.48477e-05	4.29005	2.10099	up	1.26645	3.36065e-07	16.9603	4.08409	up
C16H24O10	D-Threo-guaiacylglycerol-7-O-β-D-glucoside	Phenolic acids	Phenolic acids	-	1	25085.4	65205.4	30089.6	340855	320892	350439	182630	220489	181904	293515	280493	268928	-	-	-	-	-	-	-	-	-	-	-	-	1.2297	0.000989334	4.85978	2.28089	up	1.23043	9.89865e-05	8.40823	3.0718	up
C24H38O4	Dioctyl phthalate	Organic acids	Organic acids	-	3	2.77175e+06	847512	4.70742e+06	6.32361e+06	6.32886e+06	6.42082e+06	2.1495e+06	1.98165e+06	2.46455e+06	6.61764e+06	6.18927e+06	6.85448e+06	C14227	-	1.28631	0.000104218	2.98094	1.57577	up	1.21428	0.000713917	0.345808	-1.53196	down	-	-	-	-	-	-	-	-	-	-
C13H21N3O8	Val-Asp-Asp	Amino acids and derivatives	Amino acids and derivatives	-	3	5.96106e+06	2.83314e+06	3.61913e+06	3.64281e+07	3.59275e+07	3.96071e+07	11898877	1.33298e+07	1.19614e+07	1.12005e+07	1.06275e+07	1.11867e+07	-	-	-	-	-	-	-	1.21936	0.000585255	0.332165	-1.59003	down	1.22434	0.00463802	2.99598	1.58303	up	1.24564	3.27862e-05	9.01955	3.17305	up
C11H11NO3	Methoxyindoleacetic acid	Alkaloids	Plumerane	3471-31-6	3	1.0988e+06	978467	862163	7.62296e+06	8.46597e+06	7.85483e+06	842934	804679	791280	3.03367e+06	2.80319e+06	2.95583e+06	C05660	ko00380	1.2955	0.000606909	3.6052	1.85008	up	1.22329	0.00118336	0.101859	-3.29535	down	-	-	-	-	-	1.26739	0.000644921	8.14573	3.02604	up
C23H24O12	Protocatechuic acid 4-O-(6''-O-Feruloyl)Glucoside	Phenolic acids	Phenolic acids	-	1	231630	178257	209103	467805	491200	495286	367342	288951	313040	272700	275201	268585	-	-	-	-	-	-	-	-	-	-	-	-	-	-	-	-	-	1.24798	0.000446011	2.34946	1.23233	up
C23H44NO7P	LysoPE 18:2(2n isomer)	Lipids	LPE	-	2	1.72064e+07	2.47231e+07	2.68408e+07	1.12439e+07	1.15911e+07	1.13763e+07	1.30069e+07	1.43459e+07	1.28729e+07	1.80043e+07	1.81599e+07	1.88298e+07	-	-	-	-	-	-	-	-	-	-	-	-	-	-	-	-	-	1.18073	0.0586072	0.497472	-1.00731	down
C28H50NO7P	LysoPC 20:4	Lipids	LPC	-	3	62546.2	45264.8	164585	110703	107587	106718	25733.6	13708	21673.2	27107	34665.1	37458.7	-	-	-	-	-	-	-	1.19475	0.000580441	0.18804	-2.41089	down	1.10786	0.19811	0.22436	-2.15611	down	-	-	-	-	-
C18H19NO4	N-trans-ferulicacidacylp-hydroxyphenylethylamine	Alkaloids	Phenolamine	-	1	1.39527e+06	1.3284e+06	950821	1.63919e+07	1.76419e+07	1.72395e+07	4.82618e+06	4.93379e+06	4.62863e+06	3.9346e+06	3.71414e+06	4.02859e+06	-	-	-	-	-	-	-	1.22277	0.000493199	0.280625	-1.83328	down	1.29035	8.74405e-05	3.91581	1.96931	up	1.26603	0.000119272	13.9539	3.80259	up
C9H14N2O7	Asp-Glu	Amino acids and derivatives	Amino acids and derivatives	6157-06-8	2	4.70016e+06	1.33214e+06	3.18616e+06	3.39161e+06	3.7118e+06	3.12372e+06	1.02043e+06	1.26936e+06	1.296e+06	245370	199209	285114	-	-	1.28016	0.00533984	0.203496	-2.29693	down	1.20504	0.00139595	0.350615	-1.51204	down	-	-	-	-	-	-	-	-	-	-
C16H32O3	2-Hydroxyhexadecanoic acid	Organic acids	Organic acids	764-67-0	1	1.24464e+06	1.42522e+06	1.4217e+06	2.7026e+06	2.80989e+06	2.85022e+06	1.41744e+06	1.464e+06	1.38189e+06	1.71747e+06	1.63136e+06	1.69951e+06	-	-	-	-	-	-	-	-	-	-	-	-	-	-	-	-	-	1.25843	7.92814e-05	2.04389	1.03132	up
C57H90O24	Marstenacisside B5	Steroids	Steroidal saponins	-	1	290992	176881	305510	7.49627e+06	7.4727e+06	9.68597e+06	1.71601e+07	1.80019e+07	1.87803e+07	3.57897e+06	3.06528e+06	3.24902e+06	-	-	1.29431	0.000373524	0.183405	-2.4469	down	1.19387	0.000842521	2.18789	1.12954	up	1.3056	0.000641013	69.7485	6.12409	up	1.26059	0.00823903	31.8793	4.99455	up
C30H48O3	Oxyallobetulin	Terpenoids	Triterpene	-	3	84996	146283	166132	1.19628e+06	1.05788e+06	898110	529670	662590	546719	371076	356539	383728	-	-	-	-	-	-	-	-	-	-	-	-	1.25599	0.00198911	4.37578	2.12954	up	1.24152	0.00554882	7.93202	2.98769	up
C11H20N4O6	Nopaline	Amino acids and derivatives	Amino acids and derivatives	22350-70-5	3	50015	158197	89046.7	216265	146441	137390	248030	203661	235584	172444	175472	61090.1	C01682	ko00330,ko01100,ko02010	-	-	-	-	-	-	-	-	-	-	1.0596	0.0391246	2.31205	1.20917	up	-	-	-	-	-
C20H20O6	Acutissimalignan B	Lignans and Coumarins	Lignans	-	3	4.79498e+06	5.5846e+06	3.76965e+06	5.71325e+06	5.82999e+06	4.84432e+06	2.43919e+06	2.78056e+06	2.48861e+06	4.49863e+06	4.36629e+06	4.27116e+06	-	-	-	-	-	-	-	1.20261	0.00639286	0.470378	-1.08811	down	-	-	-	-	-	-	-	-	-	-
C4H6O6	L-Tartaric acid	Organic acids	Organic acids	87-69-4	1	6.96102e+06	4.62528e+06	6.15709e+06	1.71267e+07	1.70359e+07	1.18491e+07	5.27734e+06	4.89769e+06	4.56264e+06	6.60117e+06	6.95015e+06	6.58868e+06	C00898	ko00630,ko01100	-	-	-	-	-	1.19351	0.025515	0.320303	-1.64249	down	-	-	-	-	-	1.19278	0.0211323	2.59317	1.37472	up
C20H39NO2	N-Oleoylethanolamine	Alkaloids	Alkaloids	111-58-0	1	1.18651e+07	1.72547e+07	1.50331e+07	1.41882e+07	1.44802e+07	1.45926e+07	5.23326e+06	5.58243e+06	5.56726e+06	4.87292e+06	4.65032e+06	4.94439e+06	C20792	-	-	-	-	-	-	1.22226	7.29026e-07	0.378701	-1.40087	down	1.27943	0.0268417	0.37105	-1.43031	down	-	-	-	-	-
C12H22O11	D-Cellobiose	Others	Saccharides	528-50-7	3	2.07633e+06	999138	1.54588e+06	1.90824e+06	2.18853e+06	2.28044e+06	1.0249e+06	1.10302e+06	1.04252e+06	1.48436e+06	1.46967e+06	1.69986e+06	-	-	-	-	-	-	-	1.20712	0.00850865	0.497151	-1.00824	down	-	-	-	-	-	-	-	-	-	-
C20H36O3	Ethyl 9-Hydroxy-10,12-octadecadienoic acid	Lipids	Free fatty acids	-	3	3.83574e+06	5.19101e+06	4.50901e+06	4.25848e+06	4.39181e+06	4.46555e+06	1.5962e+06	1.59514e+06	1.64017e+06	1.40604e+06	1.38169e+06	1.50021e+06	-	-	-	-	-	-	-	1.22297	0.000243117	0.368372	-1.44076	down	1.29234	0.017586	0.356944	-1.48623	down	-	-	-	-	-
C5H8N2O2	5,6-Dihydro-5-methyluracil	Nucleotides and derivatives	Nucleotides and derivatives	696-04-8	2	340924	333060	278240	862145	1.00442e+06	919900	691132	621416	656795	655091	670665	580341	C00906	-	-	-	-	-	-	-	-	-	-	-	1.28653	0.000274059	2.06815	1.04834	up	1.25867	0.00114081	2.92627	1.54906	up
C27H54NO7P	LysoPC 19:1	Lipids	LPC	-	2	315948	400637	171825	726523	750276	804701	381543	610038	613322	511842	493703	574635	-	-	-	-	-	-	-	-	-	-	-	-	-	-	-	-	-	1.14066	0.0126915	2.56807	1.36069	up
C14H26N4O5	Pro-Lys-Ser	Amino acids and derivatives	Amino acids and derivatives	-	3	4.55851e+06	6.58409e+06	3.83694e+06	7.89703e+06	6.84418e+06	7.76331e+06	1.37336e+06	1.95342e+06	1.81487e+06	2.17133e+06	2.05581e+06	2.08988e+06	-	-	-	-	-	-	-	1.20851	0.000549653	0.228472	-2.12991	down	1.23281	0.0519872	0.343245	-1.54269	down	-	-	-	-	-
C8H11NO3	Pyridoxine	Others	Vitamin	65-23-6	1	741309	971206	806352	3.38185e+06	3.35186e+06	4.35411e+06	4.84235e+06	6.9845e+06	7.20557e+06	2.76375e+06	2.65399e+06	2.63982e+06	C00314	ko00750,ko01100,ko01240	1.24059	0.0395883	0.423359	-1.24005	down	-	-	-	-	-	1.29381	0.017575	7.55595	2.91761	up	1.25516	0.0105132	4.40191	2.13813	up
C11H13NO3	N-Acetyl-L-phenylalanine	Amino acids and derivatives	Amino acids and derivatives	2018-61-3	1	201483	270369	253526	609754	650857	633360	405195	391695	416894	340029	346737	340445	C03519	ko00360,ko01100	-	-	-	-	-	-	-	-	-	-	-	-	-	-	-	1.24789	0.000352423	2.61101	1.38461	up
C6H12O6	sorbose	Others	Saccharides	-	3	1.83323e+06	945597	2.40801e+06	2.14695e+06	2.22747e+06	2.08372e+06	831885	917485	853697	1.04829e+06	1.03337e+06	1.02422e+06	-	-	-	-	-	-	-	1.22026	5.57857e-05	0.403068	-1.31091	down	-	-	-	-	-	-	-	-	-	-
C16H18O8	5-O-p-Coumaroylquinic acid*	Phenolic acids	Phenolic acids	1899-30-5	2	3.34104e+06	1.71562e+06	3.24937e+06	2.2487e+07	2.45069e+07	2.50771e+07	3.71431e+06	3.46254e+06	3.54741e+06	3.12918e+06	4.07722e+06	3.0363e+06	C12208	ko00940,ko00941,ko00945,ko01110	-	-	-	-	-	1.22282	0.00135562	0.148802	-2.74854	down	-	-	-	-	-	1.24273	6.60028e-05	8.67693	3.11718	up
C18H30O3	13S-Hydroxy-9Z,11E,15Z-octadecatrienoic acid	Lipids	Free fatty acids	87984-82-5	1	169739	197446	138573	33618.1	36297.8	37497.3	30636.9	31247.6	30875.1	42743.7	45223.5	43126.5	C16316	ko00592	-	-	-	-	-	-	-	-	-	-	1.30019	0.0149094	0.183407	-2.44688	down	1.25546	0.0156686	0.21238	-2.23528	down
C21H22O8	Graminone B	Lignans and Coumarins	Lignans	161407-73-4	3	149713	123022	144958	3.82873e+06	3.18043e+06	2.41571e+06	147678	229153	424962	243412	279744	437525	-	-	-	-	-	-	-	1.1817	0.016528	0.085072	-3.55517	down	-	-	-	-	-	1.26403	0.0179686	22.5641	4.49596	up
C8H11NO	L-Tyramine	Alkaloids	Alkaloids	51-67-2	1	2.10571e+07	3.02622e+07	3.0597e+07	30346372	2.94792e+07	3.07529e+07	1.51838e+07	1.60907e+07	1.33483e+07	3.01048e+07	3.04393e+07	3.20195e+07	C00483	ko00350,ko00950,ko01100,ko01110,ko01240	1.28066	0.000159673	2.07436	1.05266	up	1.20966	0.000598148	0.492643	-1.02139	down	-	-	-	-	-	-	-	-	-	-
C21H20O9	1,3-O-Dicaffeoylglycerol	Phenolic acids	Phenolic acids	-	3	432335	231410	483072	1.12594e+06	550176	1.09913e+06	436799	516832	455588	619962	574967	642865	-	-	-	-	-	-	-	-	-	-	-	-	-	-	-	-	-	1.01282	0.0858149	2.41996	1.27498	up
C17H14O6	5,4'-Dihydroxy-3,7-dimethoxyflavone(Kumatakenin)	Flavonoids	Flavonols	3301-49-3	3	30289	27310.9	89609.1	3062.37	4588.15	3136.3	874.846	1410.91	767.012	2460.8	10210.3	750.612	-	-	-	-	-	-	-	1.15486	0.0229629	0.283009	-1.82108	down	1.27829	0.141394	0.0207376	-5.5916	down	1.2131	0.154188	0.0732755	-3.77052	down
C9H16O4	Eucommiol	Others	Alcohol compounds	55930-44-4	1	530753	540633	551859	357452	306460	293558	252673	312426	224244	383682	366605	402907	C17878	-	-	-	-	-	-	-	-	-	-	-	1.26561	0.00630164	0.486275	-1.04016	down	-	-	-	-	-
C14H26N4O11P2	Citicoline	Nucleotides and derivatives	Nucleotides and derivatives	987-78-0	3	71696.7	37562.8	75124.2	33780.9	49042.5	42690.3	23876.8	14540.3	26207.9	59704.1	31423.2	22874.9	C00307	ko00564,ko01100	-	-	-	-	-	-	-	-	-	-	1.14029	0.0692874	0.350492	-1.51255	down	-	-	-	-	-
C13H20N4O7	Asn-Pro-Asp	Amino acids and derivatives	Amino acids and derivatives	-	3	19875.3	27038.3	23905.9	4.25161e+06	4.35062e+06	3.90656e+06	5.81568e+06	5.63068e+06	5.91579e+06	1.96485e+06	2.36586e+06	2.17914e+06	-	-	1.28885	3.18786e-05	0.374945	-1.41525	down	-	-	-	-	-	1.30862	0.000208145	245.161	7.93758	up	1.26924	0.0010496	176.629	7.46458	up
C26H42N6O7	Phe-Lys-Glu-Lys	Amino acids and derivatives	Amino acids and derivatives	-	3	1.58441e+07	8.78276e+06	1.9843e+07	1.05773e+07	1.07208e+07	1.10007e+07	5.71377e+06	6.3249e+06	6.632e+06	6.85104e+06	6.84845e+06	6.91751e+06	-	-	-	-	-	-	-	-	-	-	-	-	1.11821	0.116063	0.419851	-1.25205	down	-	-	-	-	-
C23H26N2O5	N-p-Coumaroyl-N'-feruloylputrescine	Alkaloids	Phenolamine	380302-96-5	3	97382	99728.8	78415.9	535840	580315	584580	255772	270288	256462	206160	206463	208171	-	-	-	-	-	-	-	1.21948	0.00124919	0.460108	-1.11996	down	1.2954	7.61868e-05	2.84009	1.50594	up	1.26635	0.000197292	6.17267	2.62589	up
C26H34O11	Icariside E5	Others	Ketone compounds	126176-79-2	1	2.42759e+06	2.01221e+06	2.09307e+06	5.6941e+06	1.04803e+07	5.76806e+06	7.00032e+06	7.20514e+06	7.09423e+06	8.078e+06	7.5071e+06	8.09803e+06	-	-	-	-	-	-	-	-	-	-	-	-	1.30433	8.04732e-05	3.26039	1.70504	up	1.1959	0.0823733	3.35878	1.74794	up
C11H10O6	Benzoylmalic acid	Phenolic acids	Phenolic acids	22138-51-8	1	9.0973e+06	1.12214e+07	6.58814e+06	3.35458e+06	3.30025e+06	3.39459e+06	1.94227e+06	1.92562e+06	1.83045e+06	1.11933e+06	1.05544e+06	1.09875e+06	-	-	-	-	-	-	-	-	-	-	-	-	1.28328	0.0339784	0.21178	-2.23936	down	1.20309	0.0523112	0.37349	-1.42086	down
C13H14N2O3	N-Acetyl-L-Tryptophan	Amino acids and derivatives	Amino acids and derivatives	1218-34-4	3	134935	101367	149093	279091	263447	245960	157901	189991	163308	117879	130514	133739	-	-	-	-	-	-	-	-	-	-	-	-	-	-	-	-	-	1.20013	0.00237727	2.04595	1.03277	up
C21H28O3	7-Oxocallitrisic acid, methyl ester	Others	Lactones	-	3	5.12185e+06	605367	2.00457e+06	4.92769e+06	4.91265e+06	4.94666e+06	2.23536e+06	2.11133e+06	2.24543e+06	1.09406e+06	895068	1.04051e+06	-	-	1.2798	0.000157826	0.459585	-1.1216	down	1.22213	0.000128307	0.445805	-1.16551	down	-	-	-	-	-	-	-	-	-	-
C10H12N4O6	Xanthosine	Nucleotides and derivatives	Nucleotides and derivatives	146-80-5	1	1.75092e+06	1.28253e+06	1.27264e+06	3.18951e+06	3.30163e+06	3.60425e+06	210677	2.34356e+06	2.28413e+06	1.78443e+06	1.74081e+06	2.02764e+06	C01762	ko00230,ko00232,ko01100,ko01110,ko01232,ko02010	-	-	-	-	-	-	-	-	-	-	-	-	-	-	-	1.23051	0.000849745	2.34445	1.22925	up
C17H25N7O8	Ala-Asn-His-Asp	Amino acids and derivatives	Amino acids and derivatives	-	3	1.12244e+06	928038	1.44307e+06	2.80413e+06	2.67836e+06	3.20098e+06	1.6451e+06	1.7612e+06	1.61843e+06	1.41306e+06	1.62345e+06	1.32514e+06	-	-	-	-	-	-	-	-	-	-	-	-	-	-	-	-	-	1.21154	0.00136857	2.48557	1.31358	up
C16H20O9	Ferulic acid-4-O-glucoside	Phenolic acids	Phenolic acids	117405-51-3	3	8.94319e+06	5.76764e+06	7.08202e+06	3.0361e+07	29954728	3.08375e+07	1.21024e+07	1.17519e+07	1.08211e+07	1.37745e+07	13588951	1.23597e+07	-	-	-	-	-	-	-	1.22123	8.37235e-06	0.380407	-1.39439	down	-	-	-	-	-	1.24997	0.000798159	4.18271	2.06444	up
C16H12O6	6,7,8-Tetrahydroxy-5-methoxyflavone	Flavonoids	Flavones	-	3	126909	120948	487762	20779.4	76367.4	63616.6	12461	29911.9	42087	47922.9	28015.7	13746.5	-	-	-	-	-	-	-	-	-	-	-	-	1.14191	0.214924	0.114815	-3.12262	down	-	-	-	-	-
C10H10O4	Ferulic acid	Phenolic acids	Phenolic acids	537-98-4	3	615775	425318	502581	1.21895e+06	1.20268e+06	1.10326e+06	717137	770923	782119	600815	496046	620401	C01494	ko00940,ko01100,ko01110	-	-	-	-	-	-	-	-	-	-	-	-	-	-	-	1.22608	0.00115414	2.28344	1.19121	up
C23H46NO7P	LysoPC 15:1	Lipids	LPC	-	3	336953	471521	461739	189076	181261	203760	244992	341569	326295	369628	356189	309404	-	-	-	-	-	-	-	-	-	-	-	-	-	-	-	-	-	1.22029	0.0307033	0.451969	-1.1457	down
C11H9O2N	3-amino-2-naphthoic acid	Alkaloids	Alkaloids	-	1	2.1915e+06	1.81066e+06	2.09169e+06	1.43026e+07	1.58011e+07	1.57133e+07	1.75871e+06	1.64356e+06	1.68566e+06	6.12061e+06	5.86768e+06	5.90791e+06	-	-	1.29597	4.23127e-05	3.51738	1.8145	up	1.22311	0.00121843	0.111049	-3.17073	down	-	-	-	-	-	1.26661	0.000800261	7.51855	2.91046	up
C14H20N2O4S	Met-Tyr	Amino acids and derivatives	Amino acids and derivatives	13589-04-3	3	18862	24776.8	28280.7	9518.04	8340	6082.94	16762.5	14635.1	11357.7	22332.6	12162.4	15652.4	-	-	-	-	-	-	-	-	-	-	-	-	-	-	-	-	-	1.20973	0.0185545	0.332886	-1.5869	down
C8H8O3	Methyl 4-hydroxybenzoate	Phenolic acids	Phenolic acids	99-76-3	3	270236	311920	247012	207505	204654	193670	109511	137104	130753	229723	191810	186234	-	-	-	-	-	-	-	-	-	-	-	-	1.27358	0.00722207	0.455118	-1.13569	down	-	-	-	-	-
C27H37N7O7	Ser-Phe-Tyr-Arg	Amino acids and derivatives	Amino acids and derivatives	-	3	1.22801e+06	161237	798132	2.23078e+06	2.17933e+06	2.18265e+06	1.25216e+06	1.49691e+06	1.32612e+06	250064	249033	288389	-	-	1.29201	0.00345784	0.193239	-2.37154	down	-	-	-	-	-	-	-	-	-	-	-	-	-	-	-
C18H32O4	9-Hydroxy-13-oxo-10-octadecenoic Acid	Lipids	Free fatty acids	-	3	2.69287e+06	2.7666e+06	3.61607e+06	1.07424e+06	1.04664e+06	1.08469e+06	1.06135e+06	1.1221e+06	934589	2.48449e+06	2.49823e+06	2.18178e+06	-	-	1.27905	0.00128504	2.29776	1.20023	up	-	-	-	-	-	1.28362	0.0187139	0.343565	-1.54134	down	1.25209	0.0220254	0.35321	-1.5014	down
C5H11O7P	2-Deoxyribose-1-phosphate	Nucleotides and derivatives	Nucleotides and derivatives	17210-42-3	3	453218	471923	434885	213480	175657	152503	524216	487208	509245	455785	476350	468034	C00672	ko00030,ko00240,ko01100	-	-	-	-	-	1.2019	0.000329531	2.80752	1.4893	up	-	-	-	-	-	1.24006	0.00059705	0.398258	-1.32823	down
C9H11NO2	L-Phenylalanine	Amino acids and derivatives	Amino acids and derivatives	63-91-2	1	1.78571e+06	1.61238e+06	1.97105e+06	7.29621e+06	6.98597e+06	7.48933e+06	972205	1.11064e+06	1.12994e+06	1.8407e+06	1.63063e+06	1.76191e+06	C00079	ko00360,ko00400,ko00460,ko00470,ko00940,ko00960,ko00966,ko00970,ko00996,ko00999,ko01100,ko01110,ko01210,ko01230,ko02010	-	-	-	-	-	1.22174	0.000162967	0.147568	-2.76055	down	-	-	-	-	-	1.26365	1.79325e-05	4.05494	2.01968	up
C5H11N	Piperidine	Alkaloids	Piperidine alkaloids	110-89-4	3	2.86826e+06	2.47023e+06	2.43629e+06	5.52669e+06	6.69469e+06	6.17929e+06	3.12807e+06	3.04035e+06	3.30945e+06	3.16167e+06	3.16724e+06	3.47069e+06	C01746	ko00960	-	-	-	-	-	-	-	-	-	-	-	-	-	-	-	1.25089	0.00380859	2.36671	1.24288	up
C10H20O3	2,6-Dimethyl-7-octene-2,3,6-triol	Others	Alcohol compounds	73815-21-1	3	492743	510186	560631	319784	282286	286003	210568	303886	221965	346947	296696	362765	-	-	-	-	-	-	-	-	-	-	-	-	1.25033	0.00241319	0.470989	-1.08623	down	-	-	-	-	-
C21H38N8O8	Leu-Asn-Arg-Glu	Amino acids and derivatives	Amino acids and derivatives	-	3	9834944	6.60198e+06	3.92234e+06	7.94511e+06	8.48023e+06	7.95431e+06	3.39892e+06	3.009e+06	2.90058e+06	2.64611e+06	2.09531e+06	2.46894e+06	-	-	-	-	-	-	-	1.21723	3.28752e-05	0.381814	-1.38906	down	1.04072	0.162967	0.457212	-1.12906	down	-	-	-	-	-
C5H10O5	D-Ribose	Others	Saccharides	50-69-1	3	129024	54588.8	72975.3	434542	379993	378673	73042.5	73057.9	47619.5	244612	238036	218932	C00121	ko00030,ko01100,ko02010	1.26545	0.000129372	3.62162	1.85664	up	1.20905	0.000702873	0.162352	-2.6228	down	-	-	-	-	-	1.20867	0.000510188	4.65029	2.21732	up
C2H8NO4P	O-Phosphorylethanolamine	Alkaloids	Alkaloids	1071-23-4	3	174827	151806	158186	318328	313242	300715	93436.1	104243	99033.7	142511	150393	150754	C00346	ko00563,ko00564,ko00600,ko01100	-	-	-	-	-	1.22134	2.63297e-05	0.318264	-1.6517	down	-	-	-	-	-	-	-	-	-	-
C14H20N4O2	p-Coumaroylagmatine	Alkaloids	Phenolamine	7295-86-5	3	145247	327549	404179	85038.6	190130	116985	92415	137187	105602	84592.2	105132	131951	C04498	ko00330,ko01100	-	-	-	-	-	-	-	-	-	-	1.05387	0.139267	0.382227	-1.3875	down	-	-	-	-	-
C9H7NO	Α-hydroxyquinoline	Alkaloids	Alkaloids	-	1	4.89533e+06	5.26209e+06	4.99314e+06	3.0624e+07	3.40078e+07	3.53835e+07	4.5547e+06	4.24548e+06	4.71043e+06	1.42553e+07	1.36907e+07	1.51445e+07	-	-	1.2934	0.000757289	3.18938	1.67328	up	1.22193	0.00221514	0.135085	-2.88806	down	-	-	-	-	-	1.26843	0.00236751	6.60143	2.72278	up
C16H25N5O6S1	His-Met-Glu	Amino acids and derivatives	Amino acids and derivatives	-	3	1.12556e+06	1.4562e+06	996777	4.10221e+06	3.64931e+06	4.33539e+06	2.52815e+06	2.4758e+06	2.5092e+06	3.22681e+06	2.76825e+06	3.39176e+06	-	-	-	-	-	-	-	-	-	-	-	-	1.25449	0.0100015	2.0995	1.07005	up	1.24824	0.000616198	3.37762	1.75601	up
C6H13O10P	6-Phosphogluconic acid	Others	Saccharides	921-62-0	3	793359	1.73834e+06	1.00948e+06	1.1334e+07	1.04089e+07	1.0199e+07	7.31895e+06	8.65833e+06	8.37347e+06	1.15273e+07	1.07112e+07	1.02482e+07	C00345	ko00030,ko01100,ko01110,ko01200	-	-	-	-	-	-	-	-	-	-	1.27129	0.000298404	6.87645	2.78166	up	1.24531	4.07666e-05	9.02013	3.17315	up
C30H48O3	3-Hydroxycycloarta-24-ene-26-oic acid (Isomangiferolic acid)	Terpenoids	Triterpene	13878-92-7	2	112258	157139	154473	1.14682e+06	1.06405e+06	909698	525492	667041	484288	390451	385809	346132	-	-	-	-	-	-	-	-	-	-	-	-	1.27962	0.0126916	3.95597	1.98403	up	1.25939	0.00445755	7.36205	2.88011	up
C14H20O9	2-(3,4-dihydroxyphenyl)ethanediol 1-O-β-D-glucopyranoside	Phenolic acids	Phenolic acids	-	1	1.32105e+06	743958	1.20828e+06	2.30898e+06	2.36579e+06	2.14308e+06	780804	732144	744290	1.05327e+06	1.0935e+06	1.10189e+06	-	-	-	-	-	-	-	1.22141	0.0012702	0.331078	-1.59476	down	-	-	-	-	-	1.14265	0.0129435	2.08287	1.05857	up
C18H34O5	9,10,11-Trihydroxy-12-octadecenoic acid	Lipids	Free fatty acids	61911-67-9	1	386177	259021	301636	168464	167166	175877	85314.3	120965	107110	506261	508015	509714	-	-	1.2863	0.000596743	4.86293	2.28183	up	-	-	-	-	-	1.25979	0.0232661	0.330986	-1.59516	down	-	-	-	-	-
C14H23N3O7	Glu-Pro-Thr	Amino acids and derivatives	Amino acids and derivatives	-	3	848804	406732	412450	3.97272e+07	3.95443e+07	4.14715e+07	2.04924e+07	2.20505e+07	2.07275e+07	1.9807e+07	1.91925e+07	2.14824e+07	-	-	-	-	-	-	-	-	-	-	-	-	1.29958	0.000205881	37.9322	5.24535	up	1.26243	0.000115683	72.3885	6.17769	up
C16H16O8	5-O-Caffeoylshikimic acid	Phenolic acids	Phenolic acids	73263-62-4	1	188465	221012	120267	447564	483256	462123	148982	165832	176916	459156	517550	424504	-	-	1.2832	0.00475338	2.84955	1.51073	up	1.21645	3.41526e-05	0.353015	-1.5022	down	-	-	-	-	-	1.19801	0.00567748	2.62946	1.39477	up
C7H6O4	2,4-Dihydroxybenzoic acid	Phenolic acids	Phenolic acids	89-86-1	3	1.95068e+06	2.68135e+06	2.86151e+06	1.01227e+06	1.15847e+06	1.09371e+06	746795	762537	764251	826533	807684	870727	-	-	-	-	-	-	-	-	-	-	-	-	1.28578	0.0246331	0.303406	-1.72068	down	1.21684	0.034346	0.435634	-1.19881	down
C20H30O12	Verbasoside	Phenolic acids	Phenolic acids	61548-34-3	3	25495.6	92085.2	63086.8	46897.9	51159.2	47737.5	20073.2	26995.3	26759	62248.9	92085.2	80538	-	-	1.25444	0.0196944	3.18136	1.66965	up	-	-	-	-	-	-	-	-	-	-	-	-	-	-	-
C9H8O2	Cinnamic acid	Phenolic acids	Phenolic acids	140-10-3	3	869012	1.0524e+06	872422	114866	81469.2	103320	222137	221517	227268	870731	942930	898538	C00423	ko00130,ko00360,ko00940,ko00996,ko00999,ko01100,ko01110	1.29599	0.000882574	4.04249	2.01525	up	1.18759	0.00496296	2.23898	1.16284	up	1.30503	0.00720539	0.240144	-2.05803	down	1.26193	0.00440822	0.107256	-3.22087	down
C26H48NO7P	LysoPC 18:3	Lipids	LPC	-	1	2.84726e+06	3.22719e+06	4.53649e+06	1.8903e+06	1.85584e+06	1.84591e+06	1.6587e+06	1.83177e+06	1.53028e+06	1.91574e+06	1.89175e+06	1.97648e+06	-	-	-	-	-	-	-	-	-	-	-	-	1.21517	0.0639602	0.473167	-1.07958	down	-	-	-	-	-
C7H6O3	Protocatechualdehyde	Phenolic acids	Phenolic acids	139-85-5	3	1.0633e+06	1.28084e+06	1.14221e+06	2.63238e+06	2.41513e+06	2.52075e+06	1.4258e+06	1.55514e+06	1.47059e+06	1.57148e+06	1.53445e+06	1.63779e+06	C16700	ko00950	-	-	-	-	-	-	-	-	-	-	-	-	-	-	-	1.25645	0.000108403	2.17082	1.11824	up
C14H18O9	2-β-D-Glucopyranosyloxy-5-hydroxy-phenylacetic acid	Phenolic acids	Phenolic acids	-	1	342072	399056	294326	700453	669541	733002	18438.7	368614	358192	360972	373246	402439	-	-	-	-	-	-	-	-	-	-	-	-	-	-	-	-	-	1.23438	0.00139277	2.03099	1.02218	up
C20H24O5	5-hydroxy-1-(4-hydroxyphenyl)-7-(4-hydroxy-3-methoxyphenyl)-3-heptanone	Others	Ketone compounds	-	2	5.0933e+06	1.29424e+07	6.08799e+06	9.00498e+06	7.20682e+06	7.20046e+06	1.21434e+07	1.15165e+07	1.11618e+07	3.85861e+06	3.83971e+06	3.77279e+06	-	-	1.29548	0.00125413	0.329424	-1.60198	down	-	-	-	-	-	-	-	-	-	-	-	-	-	-	-
C22H30N4O10	Glu-Phe-Thr-Asp	Amino acids and derivatives	Amino acids and derivatives	-	3	10118.8	5005	5086.54	1.27226e+06	1.27735e+06	1.33887e+06	417914	422821	427522	13611.5	20931.1	8766.06	-	-	1.28327	1.8418e-07	0.0341481	-4.87205	down	1.22309	0.000497644	0.326158	-1.61636	down	1.30273	3.16411e-07	62.7528	5.97161	up	1.26541	0.000254409	192.4	7.58797	up
C26H26O12	3,4-O-Dicaffeoylquinic Acid Methyl Ester	Phenolic acids	Phenolic acids	-	3	2.50539e+06	2.78928e+06	1.95743e+06	1.90711e+06	1.9698e+06	1.9294e+06	999591	1.00589e+06	1.02293e+06	1.09681e+06	1.10605e+06	1.16771e+06	-	-	-	-	-	-	-	-	-	-	-	-	1.27245	0.0286922	0.417591	-1.25984	down	-	-	-	-	-
C30H48O4	2-Hydroxyursolic acid	Terpenoids	Triterpene	-	3	1.89656e+06	3.53286e+06	2.68042e+06	7.4351e+06	6.86717e+06	6.24856e+06	4.66944e+06	5.54203e+06	5.24787e+06	2.88141e+06	2.85011e+06	3.16048e+06	-	-	-	-	-	-	-	-	-	-	-	-	-	-	-	-	-	1.1851	0.00291526	2.53406	1.34145	up
C26H34O11	Isolariciresinol-9'-O-glucoside	Lignans and Coumarins	Lignans	63358-12-3	2	286715	422930	434609	1.86059e+06	1.88968e+06	1.9425e+06	958408	1.08162e+06	1.09488e+06	1.18818e+06	1.1274e+06	1.13669e+06	-	-	-	-	-	-	-	-	-	-	-	-	1.25975	0.000519345	2.7397	1.45402	up	1.25192	0.000105048	4.97509	2.31472	up
C15H30N4O5	Lys-Leu-Ser	Amino acids and derivatives	Amino acids and derivatives	-	3	1.27526e+06	147274	1.02983e+06	3.5985e+06	3.60985e+06	3.74026e+06	2.63828e+06	3.19321e+06	3.0529e+06	647737	673228	800616	-	-	1.28748	0.00320959	0.238799	-2.06613	down	-	-	-	-	-	1.00437	0.0121797	3.62278	1.8571	up	1.01067	0.0131319	4.4645	2.1585	up
C21H18O13	Quercetin-5-O-glucuronide	Flavonoids	Flavonols	-	3	127502	124567	119577	2.15985e+06	2.19868e+06	2.26837e+06	931946	862530	854825	524477	937146	1.03921e+06	-	-	-	-	-	-	-	1.22134	8.96622e-06	0.39978	-1.32272	down	1.30917	0.000952299	7.12856	2.83361	up	1.26995	0.000216175	17.8312	4.15633	up
C18H28O2	9,12-Octadecadien-6-Ynoic Acid	Lipids	Free fatty acids	61481-29-6	3	386436	288255	381878	134070	142148	145357	70848.1	67314.2	70047.4	166146	146011	150229	-	-	1.28984	0.00422279	2.22077	1.15106	up	1.21971	0.000972372	0.493886	-1.01775	down	1.29941	0.0124871	0.197062	-2.34328	down	1.24388	0.021123	0.399003	-1.32553	down
C5H14N4	Agmatine	Alkaloids	Alkaloids	306-60-5	3	390991	734021	419844	1.28609e+06	1.24524e+06	1.31469e+06	1.59881e+06	1.62055e+06	1.8167e+06	994154	970722	1.11744e+06	C00179	ko00330,ko01100	-	-	-	-	-	-	-	-	-	-	1.24019	0.00181716	3.25989	1.70482	up	1.17598	0.0172829	2.48957	1.31589	up
C26H26O12	4,5-O-Dicaffeoylquinic Acid Methyl Ester	Phenolic acids	Phenolic acids	-	3	33744.1	29857.5	69603.2	4.73162e+06	5.65309e+06	5.33978e+06	619471	242715	184864	209528	56467.6	59511.7	-	-	-	-	-	-	-	1.18601	0.00056349	0.0665873	-3.90861	down	1.19457	0.153779	7.86045	2.97461	up	1.26021	0.00265011	118.047	6.88322	up
C31H38O16	2'-Acetylacteoside	Phenolic acids	Phenolic acids	94492-24-7	3	45868.5	21675	33733.8	9	9	9	76919.2	50660.9	63636.7	53996.6	45066.6	43600.1	-	-	-	-	-	-	-	1.22332	0.0138543	7082.11	12.79	up	-	-	-	-	-	1.26856	0.0402541	0.000266595	-11.8731	down
C10H18N2O5	γ-Glutamyl-L-valine	Amino acids and derivatives	Amino acids and derivatives	-	3	193114	218633	246988	1.01744e+06	1.13818e+06	1.15634e+06	371239	365593	358600	286292	284345	319229	-	-	-	-	-	-	-	1.2205	0.00328018	0.330751	-1.59618	down	-	-	-	-	-	1.26239	0.000892616	5.02775	2.32991	up
C20H36N8O9	Thr-Arg-Gln-Glu	Amino acids and derivatives	Amino acids and derivatives	-	3	929755	1.00067e+06	1.17246e+06	2.82096e+06	3.13475e+06	3.14437e+06	2.07545e+06	1.86217e+06	1.93126e+06	1.91971e+06	2.00144e+06	1.75338e+06	-	-	-	-	-	-	-	-	-	-	-	-	-	-	-	-	-	1.2552	0.00022644	2.93278	1.55227	up
C13H25N3O5S1	Thr-Leu-Cys	Amino acids and derivatives	Amino acids and derivatives	-	3	2.87638e+06	1.30191e+06	954081	5.38057e+07	5.3076e+07	5.18923e+07	1.88494e+07	2.19772e+07	2.09181e+07	1.75975e+07	1.97967e+07	2.07181e+07	-	-	-	-	-	-	-	1.2177	3.86187e-05	0.388884	-1.36259	down	1.27086	0.000191391	12.0304	3.58862	up	1.25021	3.96349e-07	30.9358	4.95121	up
C20H20N2O4	N-Feruloylserotonin*	Alkaloids	Plumerane	68573-23-9	1	2.07653e+06	2.14888e+06	1.11962e+06	1.43906e+07	1.61609e+07	1.6167e+07	5.85839e+06	6.22715e+06	6.14613e+06	5.43639e+06	4.47554e+06	5.30054e+06	-	-	-	-	-	-	-	1.21859	0.00295885	0.390245	-1.35755	down	1.2423	0.00293012	3.41095	1.77017	up	1.24968	0.000191261	8.74054	3.12772	up
C20H30O4	Epoxyeleganolactone	Others	Others	-	3	190928	166210	140834	347147	347408	335779	159908	174742	160678	149428	154669	155292	-	-	-	-	-	-	-	1.21969	1.32168e-05	0.480744	-1.05666	down	-	-	-	-	-	1.23752	0.00426369	2.06906	1.04898	up
C7H6O2	4-Hydroxybenzaldehyde	Phenolic acids	Phenolic acids	123-08-0	3	880369	1.24582e+06	1.00786e+06	1.92022e+06	1.98759e+06	1.89819e+06	925952	923721	976146	1.31404e+06	1.36989e+06	1.29612e+06	C00633	ko01100	-	-	-	-	-	1.22099	2.72937e-05	0.486707	-1.03888	down	-	-	-	-	-	-	-	-	-	-
C27H28O16	Luteolin-7-O-glucuronide-5-O-rhamnoside	Flavonoids	Flavones	-	3	26614.2	30335	15868.2	31675	12467.5	13340	8432.21	15740.4	7255.63	21528	13589.1	6876.9	-	-	-	-	-	-	-	-	-	-	-	-	1.06526	0.0654511	0.431603	-1.21222	down	-	-	-	-	-
C6H8O5	2-Oxoadipic acid	Organic acids	Organic acids	3184-35-8	3	44057.1	145365	100138	162676	158538	176416	107820	53088	29440.3	111239	45419.7	55129	C00322	ko00300,ko00310,ko00380,ko01100,ko01110,ko01210,ko01230,ko01240	-	-	-	-	-	1.01339	0.0416245	0.382509	-1.38643	down	-	-	-	-	-	-	-	-	-	-
C18H32O3	13(S)-HODE;13(S)-Hydroxyoctadeca-9Z,11E-dienoic acid*	Lipids	Free fatty acids	10219-69-9	1	1.1102e+06	1.11687e+06	901955	632565	685897	654027	427961	441032	421593	669421	615463	680065	C14762	ko00591	-	-	-	-	-	-	-	-	-	-	1.2923	0.0125676	0.412455	-1.27769	down	-	-	-	-	-
C18H32O4	13S-Hydroperoxy-9Z,11E-octadecadienoic acid	Lipids	Free fatty acids	33964-75-9	3	36233003	2.95066e+07	3.26955e+07	1.21016e+07	1.3846e+07	1.34936e+07	5.97043e+06	6.71391e+06	6.08908e+06	1.53398e+07	1.57171e+07	1.42564e+07	C04717	ko00591,ko01100	1.28969	0.000359067	2.4137	1.27124	up	1.2108	0.00200317	0.475985	-1.07101	down	1.30453	0.00482212	0.190719	-2.39048	down	1.25524	0.00640773	0.400682	-1.31947	down
C8H14N2O5S	γ-Glu-Cys	Amino acids and derivatives	Amino acids and derivatives	636-58-8	3	34849.2	20393.9	41150.5	14243.4	10966.5	15298	6045.08	4295.98	4304.65	8599.65	8553.94	4580.29	C00669	ko00480,ko01100,ko01240	-	-	-	-	-	1.17377	0.0114635	0.361552	-1.46773	down	1.26603	0.046138	0.151937	-2.71846	down	1.11398	0.087822	0.420235	-1.25073	down
C25H41N9O13	Gln-Glu-Asp-Glu-Arg	Amino acids and derivatives	Amino acids and derivatives	-	3	77696.3	308549	110386	4.05827e+06	4.07628e+06	3.59093e+06	1.75491e+06	1.3722e+06	1.74129e+06	1.60233e+06	1.11426e+06	1.13056e+06	-	-	-	-	-	-	-	1.19826	0.000465144	0.415199	-1.26813	down	1.23627	0.00158615	9.80284	3.2932	up	1.23479	0.000350016	23.61	4.56133	up
C20H20N2O4	cis-Moschamine*	Alkaloids	Plumerane	193224-24-7	1	2.07463e+06	2.19931e+06	1.20919e+06	1.57428e+07	1.52222e+07	1.58479e+07	6.50026e+06	6.96073e+06	6.55649e+06	5.77805e+06	5.25135e+06	5.83401e+06	-	-	-	-	-	-	-	1.2218	6.73675e-06	0.427606	-1.22565	down	1.25879	0.0010444	3.65074	1.86819	up	1.25394	1.64627e-05	8.53763	3.09384	up
C59H88O24	Marstenacisside B6	Steroids	Steroidal saponins	-	1	226103	59767.2	292032	3.47307e+06	3.73248e+06	3.70031e+06	5.16789e+06	5.20969e+06	5.64534e+06	761577	817266	810713	-	-	1.29598	0.000987886	0.149134	-2.74532	down	-	-	-	-	-	1.26256	0.000130285	27.726	4.79317	up	1.20706	7.1663e-06	18.8715	4.23813	up
C13H16N2O6	Tyr-Asp	Amino acids and derivatives	Amino acids and derivatives	87085-11-8	3	2.04703e+06	1.75336e+06	1.2869e+06	2.04321e+07	2.29318e+07	2.60637e+07	1.03122e+07	9.80472e+06	1.09303e+07	1.13827e+07	1.10638e+07	1.20623e+07	-	-	-	-	-	-	-	1.20125	0.0131772	0.447188	-1.16105	down	1.29536	6.72468e-05	6.10291	2.6095	up	1.26275	0.0050583	13.6473	3.77054	up
C4H5N3O	Isocytosine	Nucleotides and derivatives	Nucleotides and derivatives	108-53-2	3	910119	1.79265e+06	1.13143e+06	2.97985e+06	2.71017e+06	6355445	3.1817e+06	3.26527e+06	3.36169e+06	4273180	4419205	4158185	-	-	-	-	-	-	-	-	-	-	-	-	1.20878	0.0145531	2.5582	1.35513	up	1.08846	0.138768	3.14159	1.65149	up
C59H86O24	Marstenacisside B7	Steroids	Steroidal saponins	-	1	2.97888e+06	2.24112e+06	803555	1.7951e+07	4.47287e+07	1.81492e+07	1.49214e+08	1.44063e+08	1.45827e+08	3.69817e+07	3.2876e+07	3.41298e+07	-	-	1.29513	9.21012e-07	0.236818	-2.07815	down	1.15913	0.00453196	5.43251	2.44162	up	1.28984	9.7972e-06	72.8977	6.1878	up	1.19175	0.106393	13.4188	3.74618	up
C26H48NO7P	LysoPC 18:3(2n isomer)	Lipids	LPC	-	1	6.32575e+06	7.7237e+06	1.13634e+07	2.51584e+06	2.59647e+06	2.63123e+06	3.76203e+06	3.90341e+06	3.42885e+06	7.62896e+06	7.46719e+06	7.54291e+06	-	-	1.28924	0.000488922	2.04061	1.029	up	-	-	-	-	-	1.20073	0.0850756	0.436563	-1.19574	down	1.22128	0.0591979	0.30471	-1.71449	down
C10H12N5O7P	Guanosine 3',5'-cyclic monophosphate	Nucleotides and derivatives	Nucleotides and derivatives	7665-99-8	3	691601	504642	633038	105580	112356	115571	103161	114153	10312.6	138098	127809	140325	C00942	ko00230,ko01100	-	-	-	-	-	-	-	-	-	-	1.10495	0.00265344	0.124435	-3.00654	down	1.26275	0.0118618	0.182316	-2.45549	down
C5H10O6	D-Xylonic acid	Others	Saccharides	526-91-0	1	6.42671e+06	3.20722e+06	4.10455e+06	7.92695e+06	7.8317e+06	7.78063e+06	4.01556e+06	4.46308e+06	4.48673e+06	9.75936e+06	1.00672e+07	9.51567e+06	C00502	ko00040,ko01100	1.2908	1.62392e-05	2.26312	1.17832	up	-	-	-	-	-	-	-	-	-	-	-	-	-	-	-
C14H14O9	Feruloyltartaric acid (Fertaric acid)	Phenolic acids	Phenolic acids	-	3	370796	317414	453232	70087.8	193178	77019	131780	145149	124625	82369.5	94230.1	96136.7	-	-	-	-	-	-	-	-	-	-	-	-	1.2797	0.0226156	0.351796	-1.50719	down	1.13064	0.00894279	0.298119	-1.74604	down
C24H36N6O9	Glu-Tyr-Asn-Lys	Amino acids and derivatives	Amino acids and derivatives	-	3	412084	495130	335984	470969	528099	505314	120891	136528	86664.8	176862	134081	206594	-	-	-	-	-	-	-	1.20418	7.03967e-05	0.228722	-2.12834	down	1.26334	0.0155974	0.276774	-1.85322	down	-	-	-	-	-
C15H21N5O8	Ribosyladenosine	Nucleotides and derivatives	Nucleotides and derivatives	-	3	4.59385e+06	4.65891e+06	4.39081e+06	1.12635e+07	1.13571e+07	1.12664e+07	9.34553e+06	9.59677e+06	9.58701e+06	6.875e+06	6.883e+06	6.19192e+06	-	-	-	-	-	-	-	-	-	-	-	-	1.30763	1.74251e-06	2.09104	1.06422	up	1.26966	2.09651e-05	2.48374	1.31251	up
C13H18O2	oleracone B	Others	Others	-	3	1.89665e+06	2.0335e+06	2.67012e+06	6.35686e+06	6.85153e+06	6.64802e+06	6.49061e+06	6.45453e+06	6.6975e+06	4.38668e+06	4.2817e+06	4.42471e+06	-	-	-	-	-	-	-	-	-	-	-	-	1.28553	0.00139541	2.97603	1.57339	up	1.24427	0.000322826	3.00842	1.58901	up
C20H22O6	Epipinoresinol*	Lignans and Coumarins	Lignans	24404-50-0	1	704145	824195	636299	2.80473e+06	3.02152e+06	2.4037e+06	1.7159e+06	1.53997e+06	1.45263e+06	1.92976e+06	1.881e+06	2.07228e+06	-	-	-	-	-	-	-	-	-	-	-	-	1.27644	0.00138033	2.17519	1.12114	up	1.25771	0.00468139	3.802	1.92676	up
C26H36O7	Vibsanin J	Terpenoids	Ditepenoids	-	3	973033	817871	1.29301e+06	1.4747e+06	1.51513e+06	1.59221e+06	428079	456460	430821	1.50087e+06	1.34571e+06	1.45626e+06	-	-	1.29424	0.00154071	3.27123	1.70983	up	1.22242	0.000506918	0.287068	-1.80053	down	1.24593	0.0514064	0.426523	-1.2293	down	-	-	-	-	-
C30H42N8O8	Pro-His-Phe-Asp-Lys	Amino acids and derivatives	Amino acids and derivatives	-	3	57840.2	25376.9	36803.6	312190	371202	387261	195063	153284	187972	97279.3	65435.1	119261	-	-	-	-	-	-	-	-	-	-	-	-	1.2495	0.00141851	4.46855	2.15981	up	1.23905	0.00177941	8.92057	3.15714	up
C31H36O18	Syringoylcaffeoylquinic acid-D-glucose	Phenolic acids	Phenolic acids	-	2	742782	321176	391120	973784	706952	767960	379064	329164	331132	434527	388597	383815	-	-	-	-	-	-	-	1.18751	0.0245067	0.424454	-1.23632	down	-	-	-	-	-	-	-	-	-	-
C10H12N2	Tryptamine	Alkaloids	Plumerane	61-54-1	3	9.89788e+06	1.03247e+07	1.43261e+07	1.68421e+07	1.7202e+07	1.65384e+07	7.20899e+06	7.50338e+06	6.80506e+06	1.2252e+07	1.26374e+07	1.31047e+07	C00398	ko00380,ko00901,ko01100,ko01110	-	-	-	-	-	1.22115	4.21304e-06	0.425393	-1.23313	down	-	-	-	-	-	-	-	-	-	-
C22H32N4O9	Tyr-Ser-Val-Glu	Amino acids and derivatives	Amino acids and derivatives	-	3	1.07808e+06	1.44716e+06	887493	3.18535e+06	2.83426e+06	2.79004e+06	2.28525e+06	2.37136e+06	2.35493e+06	1.25931e+06	1.20445e+06	1.15187e+06	-	-	-	-	-	-	-	-	-	-	-	-	1.22081	0.0162901	2.05452	1.0388	up	1.21924	0.00129389	2.58141	1.36816	up
C5H8O2	4-Pentenoic acid	Organic acids	Organic acids	591-80-0	3	604240	675320	614157	122085	221010	159773	224258	204888	301521	228659	264947	215243	-	-	-	-	-	-	-	-	-	-	-	-	1.27083	0.000678293	0.385837	-1.37394	down	1.22929	0.000315199	0.265546	-1.91297	down
C21H22O11	Aromadendrin-7-O-glucoside	Flavonoids	Flavanonols	28189-90-4	3	40447.2	126032	41337.7	426417	394295	465720	151869	186807	134472	407257	432857	432806	-	-	1.27251	0.000500438	2.69032	1.42778	up	1.19791	0.000687717	0.367799	-1.44301	down	1.01727	0.0692528	2.27676	1.18698	up	1.19041	0.000802927	6.19022	2.62999	up
C21H22O11	Dunalianoside C	Phenolic acids	Phenolic acids	-	3	40447.2	126032	41337.7	426417	394295	465720	151869	186807	134472	407257	432857	432806	-	-	1.27251	0.000500438	2.69032	1.42778	up	1.19791	0.000687717	0.367799	-1.44301	down	1.01727	0.0692528	2.27676	1.18698	up	1.19041	0.000802927	6.19022	2.62999	up
C17H28N6O9	Asn-Gly-Ser-Pro-Ser	Amino acids and derivatives	Amino acids and derivatives	-	3	8.89053e+06	1.52117e+07	1.21938e+07	1.55075e+06	1.46267e+06	1.5138e+06	1.001e+06	911629	865443	3.29754e+06	3.49578e+06	3.67039e+06	-	-	1.29272	0.000560367	3.76653	1.91324	up	-	-	-	-	-	1.3002	0.025623	0.0765395	-3.70765	down	1.25488	0.0284311	0.124731	-3.00311	down
C26H26N2O7	TyrMe-HoPhe-OH	Amino acids and derivatives	Amino acids and derivatives	-	3	14585.9	25409.2	24248.3	668539	985052	864843	9	435718	466923	318169	406983	390616	-	-	-	-	-	-	-	-	-	-	-	-	-	-	-	-	-	1.26138	0.0123879	39.2015	5.29284	up
C18H32N8O4	Ile-Arg-His	Amino acids and derivatives	Amino acids and derivatives	-	3	183887	13981.7	129705	1.0804e+06	1.49534e+06	1.1641e+06	2.38983e+06	1.80834e+06	2.04463e+06	676109	416385	509107	-	-	1.26182	0.00476454	0.256552	-1.96268	down	-	-	-	-	-	1.18509	0.00431657	19.0577	4.2523	up	1.09996	0.00594815	11.4168	3.51309	up
C16H18O8	4-O-p-Coumaroylquinic acid	Phenolic acids	Phenolic acids	32451-86-8	3	19060.8	8906.9	18640.4	139780	145293	139780	23035.7	24142.9	28380.9	16191.7	18236.1	12287.3	C10441	-	-	-	-	-	-	1.21983	1.38632e-06	0.177849	-2.49128	down	-	-	-	-	-	1.23722	4.36052e-05	9.11544	3.18831	up
C31H58O14	2-Palmitoyl-Sn-Glycerol 3-O-Diglucoside	Lipids	Glycerol ester	-	1	462990	394327	519440	213145	233259	276900	109544	118467	113301	246418	248379	218283	-	-	1.28623	0.00390071	2.08923	1.06297	up	1.19647	0.0195621	0.471879	-1.08351	down	1.30019	0.0105087	0.24791	-2.01211	down	-	-	-	-	-
C18H29NO4	Jasmonoyl-L-Isoleucine	Amino acids and derivatives	Amino acids and derivatives	120330-93-0	3	1.56526e+06	2.25412e+06	2.18371e+06	54446.9	59341.1	52524.7	106870	108646	111016	376464	367927	355089	C18699	ko04075	1.29617	0.000383224	3.36715	1.75153	up	-	-	-	-	-	1.30619	0.0131103	0.0543939	-4.20041	down	1.26715	0.0124099	0.0277045	-5.17373	down
C20H42NO7P	LysoPE 15:0(2n isomer)	Lipids	LPE	-	3	135755	258674	245118	115185	120322	119530	102564	109503	99752	101882	97654.9	97947.5	-	-	-	-	-	-	-	-	-	-	-	-	1.1216	0.106103	0.487562	-1.03634	down	-	-	-	-	-
C20H22O6	Pinoresinol*	Lignans and Coumarins	Lignans	487-36-5	1	680609	793872	607079	2.71825e+06	3.02457e+06	2.20458e+06	1.69401e+06	1.46662e+06	1.39053e+06	1.904e+06	1.89295e+06	2.0864e+06	C05366	ko00999,ko01100,ko01110	-	-	-	-	-	-	-	-	-	-	1.27126	0.00329358	2.18642	1.12857	up	1.25175	0.0114895	3.818	1.93282	up
C27H30O15	Kaempferol-3-O-glucoside-7-O-rhamnoside*	Flavonoids	Flavonols	2392-95-2	1	445700	687160	1.77817e+06	105168	15005	318695	83176.7	76044.7	79262.1	169671	28340	67711.3	-	-	-	-	-	-	-	-	-	-	-	-	1.23733	0.161816	0.0819241	-3.60957	down	-	-	-	-	-
C27H32O11	Phyllamyricoside C	Lignans and Coumarins	Lignans	-	3	1.11167e+07	8.54027e+06	1.04461e+07	2.22836e+07	1.82476e+07	1.98124e+07	1.2728e+07	1.38763e+07	1.37287e+07	1.7016e+07	1.50723e+07	1.47493e+07	-	-	-	-	-	-	-	-	-	-	-	-	-	-	-	-	-	1.22026	0.00343472	2.00456	1.00329	up
C18H32O3	alpha-Hydroxylinoleic acid*	Lipids	Free fatty acids	57818-44-7	1	1.13294e+06	1.09647e+06	900750	607754	633944	615616	392091	410385	428290	631961	593635	636457	-	-	-	-	-	-	-	-	-	-	-	-	1.29209	0.0114272	0.393196	-1.34668	down	-	-	-	-	-
C47H72O20	Medicagenic acid-3-O-glucuronide-28-O-rhamnosyl(1,2)-arabinoside	Terpenoids	Triterpene Saponin	-	2	2.4091e+06	3.76059e+06	2.20313e+06	6.51058e+06	6.51611e+06	6.75935e+06	6.79945e+06	8.83162e+06	7.62967e+06	4.16226e+06	4.12184e+06	4.35586e+06	-	-	-	-	-	-	-	-	-	-	-	-	1.23453	0.00328812	2.77812	1.47411	up	1.19501	0.0141252	2.36313	1.2407	up
C19H26O13	Protocatechuic acid 1-O-Rutinoside	Phenolic acids	Phenolic acids	-	2	1.6357e+06	942298	801986	2.37806e+06	2.27642e+06	2.67847e+06	1.60719e+06	1.40883e+06	1.30401e+06	1.11597e+06	1.03068e+06	1.05449e+06	-	-	-	-	-	-	-	-	-	-	-	-	-	-	-	-	-	1.12124	0.021432	2.16952	1.11738	up
C19H32O2	Methyl linolenate	Lipids	Free fatty acids	301-00-8	3	923264	523636	367380	86850.1	86336.6	88607.6	108847	122810	114622	141226	135803	147545	-	-	-	-	-	-	-	-	-	-	-	-	1.23691	0.0978112	0.190863	-2.38939	down	1.21746	0.0888705	0.144297	-2.79289	down
C4H9NO2	γ-Aminobutyric acid	Organic acids	Organic acids	56-12-2	3	8.38458e+06	8.98023e+06	8.78669e+06	1.76398e+07	1.82743e+07	1.79168e+07	1.43285e+07	1.37398e+07	1.50935e+07	1.69913e+07	1.67375e+07	1.69835e+07	C00334	ko00250,ko00330,ko00410,ko00650,ko00760,ko01100	-	-	-	-	-	-	-	-	-	-	-	-	-	-	-	1.26753	3.50062e-06	2.05842	1.04154	up
C14H10O7	4-(3,4,5-Trihydroxybenzoxy)benzoic acid	Phenolic acids	Phenolic acids	-	3	275703	686305	443343	264594	256971	289775	162212	174667	146692	195747	207196	200803	-	-	-	-	-	-	-	-	-	-	-	-	1.15882	0.122614	0.344093	-1.53913	down	-	-	-	-	-
C6H11NO3	Allysine(6-Oxo DL-Norleucine)	Amino acids and derivatives	Amino acids and derivatives	1962-83-0	3	8302.91	22357.2	20994	35812.9	44888.9	22417.5	31938.3	36976.7	36054.8	25998.8	21964	29467.4	C04076	ko00300,ko00310,ko00960,ko01100,ko01110,ko01230	-	-	-	-	-	-	-	-	-	-	1.01038	0.0457697	2.03217	1.02302	up	-	-	-	-	-
C6H12O6	D-Galactose	Others	Saccharides	59-23-4	3	1.79002e+06	1.0867e+06	2.38162e+06	2.06944e+06	1.96805e+06	1.94696e+06	961840	1.01287e+06	935718	983880	980513	972680	C00124	ko00052,ko01100	-	-	-	-	-	1.21996	9.53861e-05	0.486331	-1.03999	down	-	-	-	-	-	-	-	-	-	-
C30H48O4	3,19-Dihydroxyurs-12-en-28-oic acid (Pomolic acid)	Terpenoids	Triterpene	13849-91-7	1	464938	1.0852e+06	1.03178e+06	12989379	1.18768e+07	1.05872e+07	3.38559e+06	4.68453e+06	3.31069e+06	1.79983e+06	1.9384e+06	1.39028e+06	-	-	1.21224	0.0308823	0.450629	-1.14999	down	1.19556	0.00132325	0.321008	-1.63932	down	1.21835	0.0116446	4.40789	2.14009	up	1.24256	0.00223414	13.7314	3.77941	up
C18H32O16	D-Melezitose	Others	Saccharides	597-12-6	2	1.45274e+06	356529	665711	1.97568e+06	1.86681e+06	1.93122e+06	760869	808966	669520	991307	1.08624e+06	1.04639e+06	C08243	-	-	-	-	-	-	1.21556	3.59801e-05	0.387854	-1.36642	down	-	-	-	-	-	-	-	-	-	-
C20H36O2	Eicosadienoic acid	Lipids	Free fatty acids	5598-38-9	3	251754	268551	220841	484790	541749	485412	255642	253434	266241	237360	239174	251328	C16525	ko01040	-	-	-	-	-	-	-	-	-	-	-	-	-	-	-	1.2502	0.000609289	2.04002	1.02858	up
C21H20O12	Quercetin-3-O-galactoside (Hyperin)	Flavonoids	Flavonols	482-36-0	3	333297	597083	505899	144048	178019	386246	125641	138210	139074	103646	102802	97353.7	C10073	-	-	-	-	-	-	-	-	-	-	-	1.26275	0.0465045	0.280534	-1.83375	down	-	-	-	-	-
C8H8O3	3-hydroxyphenylacetic acid	Phenolic acids	Phenolic acids	621-37-4	3	10668	6223.78	23344.3	26262.1	44057.3	54631.7	26674.7	20476.2	22703	28757.2	21820.7	27037.3	C05593	ko00350,ko00360,ko01100	-	-	-	-	-	-	-	-	-	-	-	-	-	-	-	1.02399	0.0549177	3.10545	1.6348	up
C6H11NO2	Homoproline	Amino acids and derivatives	Amino acids and derivatives	56879-46-0	2	3.22023e+06	1.45899e+07	4.01872e+06	3.78516e+07	3.81324e+07	3.80488e+07	4.57015e+07	4.59428e+07	4.69961e+07	2.50286e+07	2.50506e+07	2.56289e+07	-	-	-	-	-	-	-	-	-	-	-	-	1.19043	0.00815674	6.35125	2.66704	up	1.14192	0.0138806	5.22395	2.38514	up
C12H14N2O	Harmaicidine	Alkaloids	Alkaloids	-	3	126303	406136	301645	4.66333e+06	4.35005e+06	4.88417e+06	2.19515e+06	2.20179e+06	1.8337e+06	2.09102e+06	2.36588e+06	2.02851e+06	-	-	-	-	-	-	-	1.20722	0.000281621	0.448327	-1.15738	down	1.23853	0.000531792	7.47005	2.90112	up	1.23477	0.000132867	16.662	4.05849	up
C18H18O7	3',5-Dihydroxy-4',6,7-Trimethoxyflavanone	Flavonoids	Flavanones	-	3	1.30609e+06	465245	724196	919362	995021	978785	414941	436274	403659	322269	275020	298563	-	-	-	-	-	-	-	1.22028	0.000430249	0.433737	-1.20511	down	-	-	-	-	-	-	-	-	-	-
C24H41N5O10S	Glu-Glu-Met-Ile-Ala	Amino acids and derivatives	Amino acids and derivatives	-	3	1.21203e+07	9	1.45745e+07	1.33477e+07	1.4144e+07	1.26219e+07	7.06573e+06	8.7951e+06	7.76169e+06	1.78177e+07	1.62405e+07	1.63703e+07	-	-	1.27568	0.000232895	2.13477	1.09408	up	-	-	-	-	-	-	-	-	-	-	-	-	-	-	-
C6H7N5O	6-O-methylguanine	Nucleotides and derivatives	Nucleotides and derivatives	20535-83-5	3	766598	605129	583750	4.93505e+06	5.00492e+06	5.6823e+06	2.39812e+06	2.47326e+06	2.68087e+06	4.41489e+06	5.53327e+06	5.06658e+06	-	-	-	-	-	-	-	1.20882	0.00384072	0.483428	-1.04863	down	1.29878	0.000127886	3.8621	1.94938	up	1.26495	0.00170907	7.98898	2.99801	up
C8H15NO6	N-Acetyl-D-mannosamine	Others	Saccharides	7772-94-3	3	135849	86483.2	132511	89476.1	75252.7	87166.7	60938.9	36458.2	65939.3	75911	46628.7	64423.9	C00645	ko00520,ko01100,ko01250	-	-	-	-	-	-	-	-	-	-	1.11954	0.0365539	0.460306	-1.11934	down	-	-	-	-	-
C22H22O10	Acacetin-7-O-galactoside	Flavonoids	Flavones	-	3	597664	118337	544228	857866	945671	988088	163088	199565	163362	106278	331038	111757	-	-	-	-	-	-	-	1.21862	0.00117177	0.188426	-2.40793	down	-	-	-	-	-	-	-	-	-	-
C10H19N3O4S1	Ala-Met-Gly	Amino acids and derivatives	Amino acids and derivatives	-	3	2.07441e+06	1.77824e+06	1.17272e+06	2.50481e+07	2.84924e+07	2.79666e+07	1.27691e+07	1.28465e+07	1.2485e+07	1.43213e+07	1.31911e+07	1.47472e+07	-	-	-	-	-	-	-	1.21687	0.0050616	0.467451	-1.09711	down	1.29282	9.81123e-05	7.58164	2.92251	up	1.262	0.00102615	16.2191	4.01962	up
C21H38O8	Hydroxypentadecenoic acid glucoside	Lipids	Free fatty acids	-	2	247107	378094	290976	239412	244676	95129.1	97952.5	85891.8	40109.1	146349	112464	144551	-	-	-	-	-	-	-	-	-	-	-	-	1.209	0.0144466	0.244443	-2.03243	down	-	-	-	-	-
C5H10O5	D-Arabinose	Others	Saccharides	10323-20-3	2	708175	422914	619076	2.4126e+06	2.55766e+06	2.29178e+06	451523	946112	944973	810640	1.51455e+06	1.4834e+06	C00216	ko00040,ko00053,ko00520,ko01100,ko01250	-	-	-	-	-	1.12684	0.00359896	0.322583	-1.63226	down	-	-	-	-	-	1.2387	9.19372e-05	4.14934	2.05288	up
C21H20O11	Kaempferol-3-O-galactoside (Trifolin)*	Flavonoids	Flavonols	23627-87-4	3	323519	205272	434709	122089	289320	228327	112093	51464.8	61664.8	61732.4	69796.1	54762.7	C12626	ko00944,ko01110	-	-	-	-	-	1.01794	0.0910862	0.352056	-1.50612	down	1.19706	0.0561851	0.233755	-2.09693	down	-	-	-	-	-
C33H42O10	AmotSangin B	Others	Others	-	3	230355	122547	190464	3.63928e+06	3.17716e+06	3.313e+06	5.2123e+06	4.80309e+06	4.97608e+06	1.43887e+06	1.5533e+06	1.58512e+06	-	-	1.29434	0.000321501	0.305326	-1.71158	down	-	-	-	-	-	1.30243	0.000281742	27.59	4.78607	up	1.25835	0.00115765	18.642	4.22049	up
C13H16N2O4	Phenylacetyl-L-glutamine	Amino acids and derivatives	Amino acids and derivatives	28047-15-6	3	122833	77021.5	39918.9	57933.4	81450.7	26685.7	57363.2	70837.7	53235.6	18161.5	29696.3	19315.3	C04148	ko00360	1.22458	0.00595136	0.370229	-1.43351	down	-	-	-	-	-	-	-	-	-	-	-	-	-	-	-
C21H34N6O9	Asp-Pro-Asn-Gly-Leu	Amino acids and derivatives	Amino acids and derivatives	-	3	445403	144722	133733	7.36455e+06	7.57332e+06	8.02907e+06	4.33787e+06	4.49034e+06	4.18254e+06	920186	868019	857085	-	-	1.29588	0.000393094	0.203316	-2.29821	down	-	-	-	-	-	1.27134	8.4643e-06	17.9742	4.16785	up	1.24252	5.69511e-05	31.7285	4.98771	up
C8H8O3	2',6'-Dihydroxyacetophenone	Phenolic acids	Phenolic acids	699-83-2	3	421592	327478	540456	229421	214737	230465	184274	103809	74898.9	161851	93270.9	189691	-	-	-	-	-	-	-	-	-	-	-	-	1.18919	0.0207565	0.281485	-1.82887	down	-	-	-	-	-
C20H30O3	14(15)-EpETE	Lipids	Free fatty acids	-	3	922802	1.29596e+06	1.01296e+06	4.74916e+06	5.0013e+06	5.27489e+06	1.94217e+06	2.23959e+06	2.05497e+06	1.91823e+06	1.81946e+06	2.13004e+06	-	-	-	-	-	-	-	1.21554	0.00032923	0.41508	-1.26854	down	-	-	-	-	-	1.25944	5.86888e-05	4.64933	2.21702	up
C21H40N8O8	Thr-Arg-Lys-Glu	Amino acids and derivatives	Amino acids and derivatives	-	3	2.2601e+07	1.3076e+07	2.60583e+07	6.86134e+06	5.79592e+06	5.74571e+06	2.13219e+06	2.33488e+06	2.21065e+06	4.97805e+06	5.5725e+06	5.52703e+06	-	-	1.28998	0.00186469	2.40764	1.26762	up	1.21423	0.00733403	0.362861	-1.46251	down	1.28482	0.0419133	0.108167	-3.20867	down	1.1954	0.0640209	0.298095	-1.74616	down
C19H26O15	Monogalloyl-diglucose	Phenolic acids	Phenolic acids	-	3	64512.2	32618.3	40079.1	163557	170802	215720	106062	89626	76288.4	61600.1	73498.4	92856	-	-	-	-	-	-	-	1.15204	0.0147775	0.494432	-1.01616	down	-	-	-	-	-	1.21288	0.00412155	4.00903	2.00325	up
C23H24O9	1,2-O-Diferuloylglycerol	Phenolic acids	Phenolic acids	-	3	563146	724742	672962	99440	109177	96982.3	469078	389697	356121	143108	119677	122162	-	-	1.2778	0.0113505	0.316856	-1.6581	down	1.21292	0.0112366	3.97545	1.99112	up	-	-	-	-	-	1.26477	0.00709828	0.15585	-2.68177	down
C3H5NO4	Aminomalonic acid	Organic acids	Organic acids	1068-84-4	3	3.54302e+06	4.42675e+06	2.48115e+06	757974	774285	1.14877e+06	2.34626e+06	1.32908e+06	1.94852e+06	1.78966e+06	2.76078e+06	2.64931e+06	C00872	-	-	-	-	-	-	1.05572	0.0632571	2.09765	1.06878	up	-	-	-	-	-	1.20566	0.0384114	0.256535	-1.96277	down
C9H10O5	Methyl 3-O-Methyl Gallate	Phenolic acids	Phenolic acids	3934-86-9	3	89201.3	109085	91122.5	19846	53933.6	67120.9	519578	339050	346349	158284	89041.6	150560	-	-	1.19877	0.0325616	0.330202	-1.59858	down	1.15243	0.0216943	8.55197	3.09626	up	1.28045	0.0341157	4.16357	2.05782	up	-	-	-	-	-
C28H52NO9P	1-(2,3-dihydroxypropoxy)-3-(((2-(dimethylamino)ethoxy)(hydroxy)phosphoryl)oxy)propan-2-yl (8E,11Z,14Z)-octadeca-8,11,14-trienoate*	Lipids	LPE	-	2	176244	219612	327132	60903	57943.7	64633.3	91269.3	94768.8	85597.9	189743	170196	195191	-	-	1.28382	0.00304842	2.04366	1.03115	up	-	-	-	-	-	1.22321	0.0780282	0.375713	-1.4123	down	1.22839	0.0566857	0.25378	-1.97835	down
C21H20O12	Quercetin-3-O-glucoside (Isoquercitrin)	Flavonoids	Flavonols	482-35-9	3	208908	418398	342999	123493	117465	257235	88415.2	100121	90642.1	74450.4	63356.4	70742.8	C05623	ko00944,ko01100,ko01110	-	-	-	-	-	-	-	-	-	-	1.24027	0.0635201	0.287723	-1.79725	down	-	-	-	-	-
C33H60O14	Gingerglycolipid C	Lipids	Glycerol ester	-	1	166371	76149	176998	190987	193207	195506	51701.5	54978.3	52498.3	39607.3	34799.8	47149.8	-	-	-	-	-	-	-	1.22326	2.82847e-07	0.274587	-1.86466	down	1.11886	0.113142	0.379431	-1.39809	down	-	-	-	-	-
C14H18O9	Vanillic acid-4-O-glucoside	Phenolic acids	Phenolic acids	32142-31-7	3	87727.1	108297	101411	167210	169882	162710	202954	248591	242431	180053	181779	157231	-	-	-	-	-	-	-	-	-	-	-	-	1.27926	0.00506737	2.3332	1.22231	up	-	-	-	-	-
C23H30O11	Guaiacylglycerol-β-Guaiacyl Ether glucoside	Lignans and Coumarins	Lignans	-	1	174075	310857	199160	931822	987501	938168	594643	615301	622682	752105	682780	712483	-	-	-	-	-	-	-	-	-	-	-	-	1.23504	0.00964594	2.67892	1.42165	up	1.237	0.000994624	4.17706	2.06249	up
C6H12O6	D-Mannose	Others	Saccharides	3458-28-4	3	1.63338e+06	816876	2.09986e+06	1.70167e+06	1.6153e+06	1.6661e+06	750160	714951	789538	962478	827471	856803	C00159	ko00051,ko00052,ko00520,ko01100,ko01250,ko02010	-	-	-	-	-	1.21925	1.26377e-05	0.452461	-1.14413	down	-	-	-	-	-	-	-	-	-	-
C12H19N5O5S1	Ser-Cys-His	Amino acids and derivatives	Amino acids and derivatives	-	3	1.59804e+07	1.4658e+07	1.28802e+07	5.00948e+07	5.74008e+07	5.63679e+07	2.19308e+07	2.32894e+07	1.99433e+07	1.89562e+07	1.78108e+07	2.00063e+07	-	-	-	-	-	-	-	1.21354	0.00154858	0.397669	-1.33036	down	-	-	-	-	-	1.26291	0.00106989	3.76536	1.91279	up
C6H14O12P2	D-Glucose 1,6-bisphosphate	Others	Saccharides	10139-18-1	3	77721.6	67627.5	13690.8	82838.3	112533	119311	57184.2	50540.5	31710.5	62998.7	93866.4	65384.5	C01231	ko00500,ko01100	-	-	-	-	-	1.09327	0.0164304	0.443097	-1.17431	down	-	-	-	-	-	-	-	-	-	-
C15H12O7	3-O-Hydroxybenzoyl Methylgallate	Phenolic acids	Phenolic acids	-	2	127769	111882	112765	1.10688e+06	1.17041e+06	1.14948e+06	542534	589653	550803	879324	896874	1.02239e+06	-	-	-	-	-	-	-	1.21948	2.66845e-05	0.49113	-1.02582	down	1.30737	0.000326358	4.77558	2.25568	up	1.269	0.00013306	9.72365	3.2815	up
C23H34N8O9	Asn-Tyr-Asp-Arg	Amino acids and derivatives	Amino acids and derivatives	-	3	782498	1.44265e+06	1.86638e+06	320807	423173	311042	674024	788945	650710	259498	263204	211763	-	-	1.27763	0.00385502	0.347481	-1.52499	down	1.16259	0.00352907	2.00345	1.00248	up	-	-	-	-	-	1.17277	0.083057	0.257855	-1.95537	down
C20H20O7	8-Hydroxy-α-conidendrin	Lignans and Coumarins	Lignans	-	2	86986.5	31064.5	26323.3	1.23432e+06	1.11347e+06	582524	47185.3	113053	100593	51035.2	151175	296229	-	-	-	-	-	-	-	1.17255	0.0457935	0.0890113	-3.48987	down	-	-	-	-	-	1.22327	0.0423097	20.2966	4.34317	up
C9H7NO	8-hydroxyquinoline	Alkaloids	Quinoline alkaloids	148-24-3	1	5.11252e+06	5.50618e+06	5.33111e+06	3.58556e+07	3.86285e+07	3.8798e+07	4.53071e+06	4.44422e+06	4.88014e+06	1.49381e+07	1.43873e+07	1.5781e+07	C19434	-	1.29401	0.00057938	3.25559	1.70292	up	1.22278	0.000673899	0.122306	-3.03143	down	-	-	-	-	-	1.26926	0.00074381	7.1024	2.82831	up
C18H32O3	12,13-Epoxy-9-Octadecenoic Acid	Lipids	Free fatty acids	6799-85-5	1	197190	215572	209721	50680.2	51340.1	53914.2	43553.1	46938.9	41368.5	79639.2	78520.8	75735.8	C14826	ko00591,ko01100	-	-	-	-	-	-	-	-	-	-	1.30777	0.000465694	0.21183	-2.23902	down	1.26855	0.000880613	0.250504	-1.99709	down
C5H6O5	α-Ketoglutaric acid	Organic acids	Organic acids	328-50-7	3	2.30462e+06	2.02303e+06	2.82082e+06	1.37128e+06	1.48399e+06	1.5963e+06	529523	563188	521426	650500	783858	887096	C00026	ko00020,ko00040,ko00053,ko00220,ko00250,ko00300,ko00310,ko00340,ko00430,ko00470,ko00630,ko00650,ko00660,ko01100,ko01110,ko01200,ko01210,ko01230,ko01240	-	-	-	-	-	1.21812	0.00357468	0.362599	-1.46355	down	1.29788	0.0154367	0.225802	-2.14687	down	-	-	-	-	-
C12H16O4	Senkyunolide H	Others	Lactones	94596-27-7	2	8.57116e+06	1.4794e+06	5.17386e+06	1.20438e+07	1.07014e+07	1.11781e+07	9	9	9	3.93686e+06	2.98371e+06	4.16531e+06	-	-	1.29671	0.00945303	410588	18.6473	up	1.22378	0.00120524	7.95914e-07	-20.2609	down	1.30477	0.131474	1.77347e-06	-19.105	down	-	-	-	-	-
C28H52NO9P	2-(2,3-dihydroxypropoxy)-3-(((2-(dimethylamino)ethoxy)(hydroxy)phosphoryl)oxy)propyl (8E,11Z,14Z)-octadeca-8,11,14-trienoate*	Lipids	LPE	-	2	171679	192224	314377	55576.8	60677.7	66898.3	81356	93530.9	75151.3	179796	174171	182004	-	-	1.27852	0.000871422	2.14356	1.10001	up	-	-	-	-	-	1.21492	0.0830253	0.368636	-1.43973	down	1.22004	0.0649724	0.270025	-1.88883	down
C9H15N3O4	Pro-Asn	Amino acids and derivatives	Amino acids and derivatives	107856-82-6	3	1.5426e+06	1.3041e+06	1.16324e+06	2.51806e+06	2.6976e+06	2.97517e+06	3.51377e+06	3.16609e+06	3.1425e+06	1.9074e+06	1.96889e+06	1.95836e+06	-	-	-	-	-	-	-	-	-	-	-	-	1.28642	0.000299618	2.4495	1.29249	up	1.22968	0.00147686	2.04263	1.03043	up
C20H24N6O4S1	Cys-Trp-His	Amino acids and derivatives	Amino acids and derivatives	-	3	5.74773e+06	8.29093e+06	5.9121e+06	2.59514e+06	2.76447e+06	2.714e+06	2.20903e+06	2.06186e+06	2.27953e+06	4.61199e+06	4.94311e+06	4.85041e+06	-	-	1.29131	7.77804e-05	2.19918	1.13696	up	-	-	-	-	-	1.28029	0.031556	0.328329	-1.60678	down	1.22363	0.0400317	0.404677	-1.30516	down
C31H36O11	Erythro-Guaiacylglycerol-β-O-4'-dehydrodisinapyl Ether	Lignans and Coumarins	Lignans	613684-55-2	2	444922	344488	337261	1.80961e+06	2.148e+06	1.48012e+06	253468	313255	320094	481818	509481	661320	-	-	-	-	-	-	-	1.21078	0.0149016	0.163086	-2.6163	down	-	-	-	-	-	1.25099	0.0151788	4.82636	2.27094	up
C22H26N4O7	Tyr-Tyr-Asn	Amino acids and derivatives	Amino acids and derivatives	-	3	1.37086e+07	1.80453e+07	1.61119e+07	2.12708e+06	2.11404e+06	2.30526e+06	1.24254e+06	1.17936e+06	1.27464e+06	3.95804e+06	3.87915e+06	3.91603e+06	-	-	1.29579	3.25715e-07	3.17952	1.66881	up	-	-	-	-	-	1.30746	0.00715772	0.0772272	-3.69475	down	1.26511	0.0080737	0.136765	-2.87022	down
C20H22O7	Vladinol D	Lignans and Coumarins	Lignans	-	3	250540	240081	304325	1.97384e+06	1.96306e+06	1.49516e+06	617159	647570	561924	521964	571307	603784	-	-	-	-	-	-	-	1.20378	0.0149851	0.336273	-1.5723	down	1.28381	0.000552304	2.29783	1.20027	up	1.25939	0.00939672	6.83324	2.77257	up
C30H46O4	2,3-Dihydroxyoleana-11,13(18)-dien-28-oic acid (Camaldulenic acid)	Terpenoids	Triterpene	71850-15-2	2	65648	62141.6	13341.4	399908	355828	282686	148336	149777	160177	87522.3	58532	67442.6	-	-	1.23834	0.00451396	0.465857	-1.10204	down	1.18426	0.0286333	0.441332	-1.18006	down	1.0494	0.0204696	3.24726	1.69922	up	1.15086	0.00474347	7.35786	2.87929	up
C33H43N7O8	His-Ala-Tyr-Tyr-Leu	Amino acids and derivatives	Amino acids and derivatives	-	3	6.75881e+06	4.10049e+06	2.89796e+06	5.12533e+06	4.96991e+06	5.31681e+06	826376	867436	623066	876128	738604	786858	-	-	-	-	-	-	-	1.21725	8.28255e-06	0.150329	-2.73381	down	1.24917	0.0783746	0.168411	-2.56994	down	-	-	-	-	-
C22H26O8	Syringaresinol	Lignans and Coumarins	Lignans	21453-71-4	1	40969.1	29034.2	17353.5	492897	489354	417504	161747	188640	220340	63294.4	64440.7	77767.8	C10889	-	1.26722	0.0137833	0.360072	-1.47364	down	1.19089	0.00130383	0.407734	-1.2943	down	1.26393	0.00501641	6.5333	2.70781	up	1.25219	0.00174915	16.0234	4.00211	up
C8H7N	Indole	Alkaloids	Plumerane	120-72-9	2	6.62246e+06	6.52888e+06	6.59096e+06	2.25216e+07	2.24707e+07	2.24766e+07	6.13362e+06	6.05348e+06	6.53211e+06	1.19776e+07	1.12251e+07	1.16549e+07	C00463	ko00380,ko00400,ko00402,ko01100,ko01110	-	-	-	-	-	1.22269	6.93613e-05	0.27745	-1.8497	down	-	-	-	-	-	1.26987	5.35468e-09	3.41748	1.77293	up
C5H6O5	2-Methyl-3-oxosuccinic acid	Organic acids	Organic acids	-	1	316152	337143	448641	182829	203234	203252	123371	113447	121474	184409	184444	182801	C06030	ko00660	-	-	-	-	-	-	-	-	-	-	1.28517	0.0258852	0.325147	-1.62084	down	-	-	-	-	-
C6H11NO2	Cycloleucine	Amino acids and derivatives	Amino acids and derivatives	52-52-8	1	2.26971e+06	3.16262e+06	2.82371e+06	1.43155e+07	1.51124e+07	1.51398e+07	5.44902e+06	5.34242e+06	5.40201e+06	8.37319e+06	8.58872e+06	8.71765e+06	C03969	-	-	-	-	-	-	1.22292	0.000711042	0.363345	-1.46059	down	-	-	-	-	-	1.26161	5.58259e-06	5.39819	2.43248	up
C20H16O11	Caffeoyl(p-Hydroxybenzoyl)tartaric acid	Phenolic acids	Phenolic acids	-	3	865855	983664	992312	67389.7	97490.8	68511.8	107662	118868	138343	296362	314707	298723	-	-	1.27971	0.000201403	2.49345	1.31815	up	-	-	-	-	-	1.30591	0.00163436	0.128393	-2.96136	down	1.26361	0.00134495	0.0821274	-3.60599	down
C6H14O6	Allitol	Others	Saccharides	488-44-8	1	238181	298128	393207	1.3919e+06	1.27625e+06	1.39063e+06	1.1095e+06	1.12617e+06	1.26308e+06	1.19146e+06	1.27282e+06	1.08183e+06	-	-	-	-	-	-	-	-	-	-	-	-	1.27629	0.000215021	3.76406	1.91229	up	1.24338	7.33376e-05	4.36655	2.12649	up
C16H17NO9	Xanthurenic Acid 8-O-Glucoside	Alkaloids	Quinoline alkaloids	97451-32-6	1	3.02853e+06	4.01093e+06	2.97288e+06	6.68181e+06	6.9994e+06	7.03219e+06	5.30565e+06	5.6592e+06	4.98303e+06	5.75382e+06	5.68828e+06	5.84099e+06	-	-	-	-	-	-	-	-	-	-	-	-	-	-	-	-	-	1.23053	0.00486362	2.06879	1.04879	up
C12H15NO7	Pyridine-4-formyl-O-β-D-glucopyranoside	Others	Others	-	2	6.6108e+06	4.12479e+06	2.92454e+06	9.13928e+06	9.21767e+06	9.34631e+06	2.03135e+06	2.10713e+06	2.59286e+06	7.65559e+06	6.16923e+06	6.28255e+06	-	-	1.27487	0.00586796	2.98713	1.57876	up	1.21595	0.000183426	0.24298	-2.04109	down	1.04117	0.164125	0.492773	-1.021	down	1.08518	0.0493901	2.02804	1.02008	up
C17H22O10	1-O-Sinapoyl-β-D-glucose	Phenolic acids	Phenolic acids	-	2	1.1582e+06	880294	881794	439068	372579	389501	324439	376014	300778	230636	244069	223445	C01175	ko00940,ko01110	-	-	-	-	-	-	-	-	-	-	1.28002	0.0159956	0.342854	-1.54434	down	1.23545	0.021047	0.411312	-1.2817	down
C25H36N8O6	His-Asn-Phe-Lys	Amino acids and derivatives	Amino acids and derivatives	-	3	7.99396e+06	5.72974e+06	7.33899e+06	1.84624e+06	1.84308e+06	1.88161e+06	288489	360117	344488	806611	794039	683635	-	-	1.27041	0.0019891	2.30017	1.20174	up	1.21974	5.66067e-06	0.178263	-2.48792	down	1.30528	0.00990174	0.0471495	-4.40662	down	1.25714	0.0165237	0.264493	-1.9187	down
C5H11N3O2	4-Guanidinobutyric acid	Organic acids	Organic acids	463-00-3	3	3.4609e+06	2.99592e+06	5.60441e+06	1.35568e+07	1.30221e+07	1.10209e+07	9.42174e+06	1.00976e+07	1.08509e+07	9.81757e+06	1.00281e+07	9.3309e+06	C01035	ko00330,ko01100	-	-	-	-	-	-	-	-	-	-	1.21356	0.00671017	2.518	1.33228	up	1.19656	0.00158538	3.1174	1.64034	up
C10H18N4O5S1	Asn-Cys-Ala	Amino acids and derivatives	Amino acids and derivatives	-	3	2.53552e+06	2.88977e+06	3.07981e+06	9.85532e+06	1.10672e+07	1.05475e+07	5.31077e+06	6.07688e+06	5.51672e+06	7.35038e+06	7.16232e+06	7.70253e+06	-	-	-	-	-	-	-	-	-	-	-	-	-	-	-	-	-	1.26261	0.00043283	3.70014	1.88758	up
C41H64O13	Digitoxin	Steroids	Steroid	71-63-6	3	97282.9	430459	425679	20398.4	22970.1	13771.4	82568.9	103379	81512.6	63407.8	72375.4	68020.8	C06955	-	-	-	-	-	-	1.19442	0.00486935	4.6808	2.22675	up	-	-	-	-	-	1.18354	0.113412	0.0599314	-4.06054	down
C18H34O4	Hydroxy ricinoleic acid	Lipids	Free fatty acids	-	3	49911.6	77332.2	94180.7	31000.4	33783.4	29081.5	33606.4	35666.2	34675.4	58224	52095.8	57244.6	-	-	-	-	-	-	-	-	-	-	-	-	1.16544	0.0932351	0.469451	-1.09095	down	1.15472	0.079426	0.423915	-1.23815	down
C28H52NO7P	LysoPC 20:3	Lipids	LPC	1199257-41-4	3	79360.2	80679.9	109025	81657.2	83228	78842.6	134408	120645	139641	36034.1	39777.2	57014.2	-	-	1.25419	0.000575907	0.336528	-1.5712	down	-	-	-	-	-	-	-	-	-	-	-	-	-	-	-
C9H16O3	9-Oxononanoic acid	Organic acids	Organic acids	2553-17-5	3	51586	60557.1	55944.7	36535.8	32895.7	29122.9	15478	25058.4	32203.7	46344.5	51180.5	38717.8	C16322	ko00592,ko01110	-	-	-	-	-	-	-	-	-	-	1.17475	0.00975565	0.432751	-1.20839	down	-	-	-	-	-
C13H12O11	Mucic acid-1,4-lactone-2-O-gallate	Phenolic acids	Phenolic acids	-	3	235215	117657	172170	348169	356967	381484	235463	242108	264524	235512	292025	233163	-	-	-	-	-	-	-	-	-	-	-	-	-	-	-	-	-	1.1199	0.0239458	2.06959	1.04934	up
C15H20O9	Syringaldehyde-4-O-glucoside	Phenolic acids	Phenolic acids	-	2	166328	132377	200872	415314	414417	424035	315660	318976	312005	135552	134507	143031	-	-	1.29532	1.76713e-06	0.436374	-1.19636	down	-	-	-	-	-	-	-	-	-	-	1.22515	0.00524099	2.50966	1.32749	up
C12H12O9	Vnilloyltartaric acid	Phenolic acids	Phenolic acids	-	3	8623.64	6510.33	16920.9	108712	125229	109791	60111.4	68081.4	61335.2	31320.8	53506.9	47077.3	-	-	-	-	-	-	-	-	-	-	-	-	1.25149	0.000281657	5.9126	2.56379	up	1.23247	0.000284138	10.7232	3.42267	up
C54H84O24	Marstenacisside B3	Steroids	Steroidal saponins	-	1	377521	491974	574974	2.40191e+06	2.20658e+06	2.52163e+06	3.46873e+06	4.13898e+06	2.89209e+06	632502	525483	572069	-	-	1.28592	0.0143292	0.16477	-2.60147	down	-	-	-	-	-	1.29189	0.0123266	7.26897	2.86175	up	1.25248	0.000206267	4.93614	2.30338	up
C21H29N5O9	Ala-Tyr-Asn-Glu	Amino acids and derivatives	Amino acids and derivatives	-	3	64688.6	57103.2	49352.1	1.36602e+07	11942837	1.30151e+07	1.19982e+07	1.26387e+07	1.34845e+07	4.22079e+06	5.97199e+06	6.02076e+06	-	-	1.24899	0.000883666	0.425314	-1.2334	down	-	-	-	-	-	1.30912	0.00115448	222.744	7.79925	up	1.26968	0.00152278	225.648	7.81793	up
C18H30O3	2R-hydroxy-9Z,12Z,15Z-octadecatrienoic acid	Lipids	Free fatty acids	-	1	418541	369279	670289	1.05596e+06	1.13501e+06	1.1459e+06	246400	278112	229573	830444	888575	799227	C16342	ko00592	1.28963	0.000237454	3.33947	1.73962	up	1.22005	0.000124175	0.225986	-2.1457	down	-	-	-	-	-	1.16145	0.0150806	2.28849	1.1944	up
C20H24O5	5-hydroxy-1-phenyl-7-(3,4-dihydroxy-5-methoxyphenyl)-3-heptanone	Others	Ketone compounds	-	2	1.23012e+07	2.6093e+07	9.34484e+06	3.92534e+06	3.84514e+06	4.04065e+06	7.55118e+06	9.04522e+06	9.00453e+06	3.54157e+06	1.39257e+07	2.72112e+06	-	-	-	-	-	-	-	1.20939	0.0104593	2.16753	1.11605	up	-	-	-	-	-	1.14102	0.146073	0.24741	-2.01502	down
C7H6O3	Salicylic acid	Phenolic acids	Phenolic acids	69-72-7	3	46866.1	29310.5	62438.7	149411	133227	140167	60400.9	55267.7	54381.9	62736.6	51276.1	62735.2	C00805	ko00996,ko01100,ko01110,ko04075	-	-	-	-	-	1.21784	0.0009757	0.402196	-1.31403	down	-	-	-	-	-	1.17957	0.00338929	3.0502	1.60891	up
C17H32N4O5	Ile-Gln-Ile	Amino acids and derivatives	Amino acids and derivatives	-	3	1.7006e+06	200166	1.96196e+06	626366	635470	605391	284229	276881	260248	698387	632621	560733	-	-	1.27973	0.0103478	2.30319	1.20363	up	1.2211	1.06165e-05	0.439881	-1.18481	down	-	-	-	-	-	-	-	-	-	-
C6H10O7	D-Galacturonic acid	Others	Saccharides	685-73-4	3	4.09739e+06	2.29845e+06	2.46731e+06	3.93538e+06	3.86631e+06	3.67439e+06	1.66255e+06	1.73324e+06	1.87448e+06	4763300	5.0064e+06	4.62917e+06	C00333	ko00040,ko00053,ko00520,ko01100,ko01240,ko01250,ko02010	1.29233	0.000111317	2.7321	1.45001	up	1.21646	4.64896e-05	0.459239	-1.12268	down	-	-	-	-	-	-	-	-	-	-
C18H19NO4	N-Feruloyltyramine; Moupinamide	Alkaloids	Phenolamine	66648-43-9	1	1.28242e+06	1.26817e+06	944556	1.6686e+07	1.77897e+07	1.76034e+07	4.79161e+06	4.97962e+06	4.74107e+06	3.75047e+06	3.72295e+06	3.97901e+06	C02717	-	-	-	-	-	-	1.22299	0.000458656	0.278659	-1.84343	down	1.29718	3.43907e-05	4.15213	2.05385	up	1.2676	0.000135962	14.9004	3.89728	up
C12H21N5O6S1	Cys-Gln-Asn	Amino acids and derivatives	Amino acids and derivatives	-	3	1.07006e+07	1.15301e+07	9.34595e+06	2.59678e+07	2.59099e+07	2.81391e+07	1.24884e+07	1.3907e+07	1.16816e+07	1.23032e+07	1.09674e+07	1.21494e+07	-	-	-	-	-	-	-	1.21015	0.000153757	0.475863	-1.07138	down	-	-	-	-	-	1.25926	8.7867e-05	2.53405	1.34145	up
C6H14N2O	N-Acetylputrescine	Alkaloids	Alkaloids	18233-70-0	3	505886	694528	438067	1.00937e+06	1.16293e+06	1.00546e+06	1.24454e+06	1.31302e+06	1.28069e+06	841889	765225	960909	C02714	ko00330,ko01100	-	-	-	-	-	-	-	-	-	-	1.24776	0.0076116	2.34257	1.22809	up	-	-	-	-	-
C28H41N7O11	Asp-Asp-Phe-Gln-Lys	Amino acids and derivatives	Amino acids and derivatives	-	3	4.55526e+06	2.86196e+06	1.38361e+06	1.2674e+07	1.21855e+07	1.25378e+07	1.85486e+06	2.02607e+06	1.85765e+06	892849	850379	935030	-	-	1.28971	0.000826005	0.466711	-1.0994	down	1.2232	2.80416e-05	0.153449	-2.70417	down	-	-	-	-	-	1.16577	0.00788789	4.2493	2.08722	up
C15H30N4O5	Thr-Lys-Val	Amino acids and derivatives	Amino acids and derivatives	-	3	2.31774e+06	4.17916e+06	4.69187e+06	918127	1.04742e+06	866679	4.20883e+06	1.84142e+06	1.6297e+06	1.91768e+06	1.90223e+06	2.04951e+06	-	-	-	-	-	-	-	1.01391	0.189333	2.71162	1.43916	up	-	-	-	-	-	1.20496	0.0602187	0.253131	-1.98204	down
C9H10O4	Methyl 2,4-dihydroxyphenylacetate	Phenolic acids	Phenolic acids	67828-42-6	3	37272.7	18523.4	36150.7	113981	90570	102925	55772	51043.9	35606.6	52522	63367	50475.5	-	-	-	-	-	-	-	1.14294	0.00390828	0.463199	-1.11029	down	-	-	-	-	-	1.18278	0.00145218	3.34406	1.7416	up
C13H16O10	2-O-Galloyl-D-glucose	Phenolic acids	Phenolic acids	-	2	519128	1.00733e+06	721509	1.78741e+06	1.77308e+06	1.78679e+06	125654	1.1938e+06	1.13e+06	1.12225e+06	1.61221e+06	1.14339e+06	-	-	-	-	-	-	-	-	-	-	-	-	-	-	-	-	-	1.17146	0.0181876	2.37872	1.25019	up
C15H20O10	Glucosyringic acid	Phenolic acids	Phenolic acids	33228-65-8	1	3.33242e+06	2.31306e+06	2.45179e+06	1.36876e+07	1.40552e+07	1.51807e+07	7.85965e+06	7.24104e+06	7.32639e+06	6.41527e+06	5.98197e+06	5.93138e+06	-	-	-	-	-	-	-	-	-	-	-	-	1.28002	0.000636564	2.76971	1.46974	up	1.2578	6.55673e-05	5.301	2.40626	up
C18H18O6	5-Hydroxy-7,8,4'-Trimethoxyflavanone	Flavonoids	Flavanones	-	3	4.47879e+06	788543	8.59577e+06	1.452e+06	1.77952e+06	1.42531e+06	510150	497809	508378	1.5663e+06	1.5099e+06	2.27915e+06	-	-	1.26858	0.0354175	3.53177	1.82039	up	1.21392	0.0115577	0.325615	-1.61876	down	1.02819	0.209519	0.109379	-3.19259	down	-	-	-	-	-
C21H32O10	(1'R,3R,5R,8'S)-Dihydrophaseic acid-O-β-D-glucoside	Phenolic acids	Phenolic acids	-	1	802194	717460	798983	1.1984e+06	1.34209e+06	1.36581e+06	1.81364e+06	1.72079e+06	1.7011e+06	1.22421e+06	1.12541e+06	1.19538e+06	-	-	-	-	-	-	-	-	-	-	-	-	1.30378	3.75306e-05	2.25802	1.17506	up	-	-	-	-	-
C10H13N5	N6-Isopentenyladenine	Nucleotides and derivatives	Nucleotides and derivatives	2365-40-4	3	69750.5	37978.2	85726.1	126339	152684	136070	166304	229584	200782	92071.2	95186.8	81534.7	C04083	ko00908,ko01110,ko04075	1.25359	0.0224252	0.450488	-1.15044	down	-	-	-	-	-	1.19696	0.00526395	3.08429	1.62494	up	1.07384	0.017763	2.14568	1.10144	up
C17H24O9	Grevilloside C	Phenolic acids	Phenolic acids	1094004-47-3	1	523937	373830	152431	2.02919e+06	1.90032e+06	2.05446e+06	1.24516e+06	1.36907e+06	1.24126e+06	1.6516e+06	1.72821e+06	1.52672e+06	-	-	-	-	-	-	-	-	-	-	-	-	1.16393	0.00663248	3.6712	1.87625	up	1.18595	0.00123428	5.69796	2.51044	up
C11H12N2O2	L-Tryptophan	Amino acids and derivatives	Amino acids and derivatives	73-22-3	1	7.62327e+06	7.59867e+06	7.344e+06	3.3683e+07	3.74048e+07	3.64707e+07	4.51102e+06	4.73108e+06	5.32838e+06	2.20926e+07	1.97523e+07	2.0806e+07	C00078	ko00260,ko00380,ko00400,ko00901,ko00966,ko00970,ko00996,ko01100,ko01110,ko01210,ko01230,ko01240	1.2927	0.000594313	4.29985	2.10429	up	1.22131	0.000826155	0.135466	-2.884	down	-	-	-	-	-	1.26895	0.00146399	4.76641	2.2529	up
C16H20O9	1-O-Feruloyl-β-D-glucose	Phenolic acids	Phenolic acids	7196-71-6	3	6.44859e+06	3.17004e+06	3.52116e+06	1.78489e+07	1.90597e+07	1.94926e+07	1.1674e+07	6.19967e+06	6.07534e+06	6.19127e+06	5.58324e+06	4.45953e+06	C17759	-	-	-	-	-	-	1.10643	0.0218995	0.424618	-1.23576	down	-	-	-	-	-	1.21814	0.00139243	4.2924	2.10178	up
C5H10O5	L-Xylose	Others	Saccharides	609-06-3	2	714585	350307	547671	2.3331e+06	2.3638e+06	2.29756e+06	466411	1336245	871241	1.59208e+06	1.58329e+06	1.44015e+06	C01510	-	-	-	-	-	-	1.05662	0.0285249	0.382288	-1.38727	down	-	-	-	-	-	1.22207	0.00266408	4.33748	2.11686	up
C10H12O5	piscrocin C	Others	Others	-	3	118240	124395	102222	220854	237208	239042	167827	157417	144186	184323	191582	217973	-	-	-	-	-	-	-	-	-	-	-	-	-	-	-	-	-	1.25244	0.000201172	2.02143	1.01538	up
C6H6N2O2	Urocanic acid	Organic acids	Organic acids	104-98-3	3	111635	184061	82522.9	440241	418172	419379	427169	429364	417039	238247	200433	199697	C00785	ko00340,ko01100	-	-	-	-	-	-	-	-	-	-	1.22763	0.00922724	3.36729	1.75159	up	1.19756	0.00735919	3.37844	1.75636	up
C17H22N4O5	Trp-Ser-Ala	Amino acids and derivatives	Amino acids and derivatives	-	3	47383.7	226289	82776.1	488465	394562	358830	175917	309629	240946	176459	190016	180882	-	-	-	-	-	-	-	-	-	-	-	-	-	-	-	-	-	1.07306	0.0146985	3.48397	1.80073	up
C26H30O11	Phellamurin	Flavonoids	Flavanonols	52589-11-4	1	7.51849e+06	1.06899e+07	8.3596e+06	9.50369e+06	9.57499e+06	1.14249e+07	2.47874e+06	2.57357e+06	2.54169e+06	4.77601e+06	4.70805e+06	4.85488e+06	C09808	-	-	-	-	-	-	1.21899	0.0066291	0.248954	-2.00605	down	1.29284	0.0216843	0.285833	-1.80676	down	-	-	-	-	-
C4H6O5	3-Dehydro-L-Threonic Acid	Others	Saccharides	-	1	7.19437e+07	4.24634e+07	7.56246e+07	2.48133e+07	2.57345e+07	2.62766e+07	2.66796e+07	2.4675e+07	2.42084e+07	1.99376e+07	2.2044e+07	2.47585e+07	C03064	ko00053,ko01100	-	-	-	-	-	-	-	-	-	-	1.20497	0.0672822	0.397634	-1.33049	down	1.17482	0.0691492	0.404272	-1.3066	down
C6H10O7	D-Glucoronic acid	Others	Saccharides	6556-12-3	1	3.87337e+06	2.09685e+06	2.39834e+06	3.26939e+06	3.50569e+06	3.38828e+06	1.36931e+06	1.60507e+06	1.59166e+06	4.21938e+06	4.21634e+06	4.15739e+06	C00191	ko00040,ko00053,ko00520,ko00562,ko01100,ko01240,ko01250	1.2902	0.000398257	2.75799	1.46362	up	1.21173	5.87148e-05	0.449265	-1.15436	down	-	-	-	-	-	-	-	-	-	-
C33H40O13	Buddlenol D	Phenolic acids	Phenolic acids	97465-75-3	1	49485.6	21837.2	30953.2	630814	428884	360137	44797.7	73264	63609.4	28021	36428.3	76639.4	-	-	-	-	-	-	-	1.19588	0.0354227	0.127952	-2.96632	down	-	-	-	-	-	1.24049	0.0314688	13.8824	3.79518	up
C9H7N	Isoquinoline	Alkaloids	Isoquinoline alkaloids	119-65-3	2	239636	280306	155344	794780	899729	977726	157041	154384	192845	581058	635581	635970	C06323	-	1.2877	8.78133e-05	3.67384	1.87729	up	1.21552	0.00370898	0.188707	-2.40578	down	-	-	-	-	-	1.23147	0.000883021	3.95719	1.98448	up
C9H11NO4	3,4-Dihydroxy-L-phenylalanine (L-Dopa)	Amino acids and derivatives	Amino acids and derivatives	59-92-7	3	501691	353938	611269	2.30078e+06	3.30751e+06	4.38656e+06	559413	421306	917050	1.34574e+06	1.20962e+06	1.91892e+06	C00355	ko00350,ko00950,ko00965,ko01100,ko01110	1.11236	0.0371253	2.35765	1.23735	up	1.1532	0.0397675	0.189875	-2.39688	down	-	-	-	-	-	1.22673	0.0402563	6.81359	2.76841	up
C28H38O14	isatioxyneolignoside E	Lignans and Coumarins	Lignans	-	3	361482	233065	433765	246143	199829	210568	109267	102898	83012.2	299407	285529	334872	-	-	1.27893	0.000991442	3.11612	1.63975	up	1.18598	0.00411251	0.449595	-1.1533	down	1.24154	0.0508025	0.28705	-1.80063	down	-	-	-	-	-
C8H7N	m-Aminophenylacetylene	Alkaloids	Alkaloids	54060-30-9	1	4249145	2.06339e+06	4247430	2.10328e+07	2.23264e+07	2.24948e+07	3331870	2768320	1.82341e+06	1.1723e+07	1.15211e+07	1.23438e+07	-	-	1.26268	0.000265508	4.49138	2.16716	up	1.20834	7.24918e-06	0.120321	-3.05504	down	-	-	-	-	-	1.22668	9.91386e-05	6.2362	2.64067	up
C9H8O4	5-Acetylsalicylic acid	Phenolic acids	Phenolic acids	13110-96-8	3	119044	66796.1	82026.4	667777	228623	596045	429846	332294	482238	520613	552547	521771	-	-	-	-	-	-	-	-	-	-	-	-	1.26973	0.0107362	4.64551	2.21584	up	1.1529	0.093548	5.5716	2.47809	up
C6H10O8	D-Galactaric acid	Others	Saccharides	526-99-8	1	9.10542e+06	5.69735e+06	5.89598e+06	1.64307e+07	1.78575e+07	1.77898e+07	8.84362e+06	8.65468e+06	9.19345e+06	1.57766e+07	1.62915e+07	1.8069e+07	C00879	ko00053,ko01100	-	-	-	-	-	-	-	-	-	-	-	-	-	-	-	1.2087	0.00478871	2.51599	1.33113	up
C28H54NO7P	LysoPC 20:2(2n isomer)	Lipids	LPC	-	3	28799.9	11026	18793.4	13961.2	19227.2	11112.2	52459.6	66857.2	67631.7	44037.1	17500.4	47403.6	-	-	-	-	-	-	-	1.18887	0.00375039	4.22001	2.07725	up	1.18722	0.00390081	3.1892	1.67319	up	-	-	-	-	-
C26H32O11	Pinoresinol-4-O-glucoside	Lignans and Coumarins	Lignans	41607-20-9	3	272143	341031	266372	698665	672687	678877	240510	185045	206695	289886	346244	313156	C17529	-	-	-	-	-	-	1.2138	0.000154737	0.30838	-1.69722	down	-	-	-	-	-	1.25092	0.00176384	2.33101	1.22095	up
C20H25N7O6	5-Methyltetrahydrofolic acid	Organic acids	Organic acids	134-35-0	3	1.07874e+06	1.08997e+06	987364	7.17051e+06	7.57017e+06	6.70874e+06	2.71441e+06	3.20424e+06	2.40238e+06	2.42649e+06	2.18469e+06	2.71314e+06	-	-	-	-	-	-	-	1.20336	0.000218279	0.387937	-1.36611	down	1.28783	0.016405	2.63651	1.39863	up	1.26904	0.00142253	6.79624	2.76474	up
C18H32O3	15(R)-Hydroxylinoleic Acid	Lipids	Free fatty acids	177931-23-6	3	247738	283063	266613	123371	110190	110442	99418.8	106108	105845	80052.4	83605.2	88686.1	-	-	-	-	-	-	-	-	-	-	-	-	1.30496	0.00282338	0.390477	-1.35669	down	1.25915	0.00143495	0.431398	-1.21291	down
C5H9N3	Histamine	Alkaloids	Alkaloids	51-45-6	3	2.24468e+06	2.01783e+06	3.331e+06	7.18945e+06	7.1762e+06	7.42148e+06	2.53881e+06	2.71714e+06	2.56305e+06	3.45266e+06	3.26015e+06	3.51677e+06	C00388	ko00340,ko01100,ko01110	-	-	-	-	-	1.22255	3.68323e-06	0.358882	-1.47842	down	-	-	-	-	-	1.21685	0.00573038	2.86918	1.52064	up
C21H38O4	2-Linoleoylglycerol*	Lipids	Glycerol ester	3443-82-1	1	2.36857e+06	1.70469e+06	1.26525e+06	275118	338706	329115	274334	322772	280955	369579	535239	444458	-	-	-	-	-	-	-	-	-	-	-	-	1.2799	0.0432312	0.164477	-2.60404	down	1.23652	0.0442413	0.17663	-2.5012	down
C24H46NO7P	LysoPC 16:2(2n isomer)	Lipids	LPC	-	3	42494.1	34017.6	62354.5	48171.3	39215.2	40199.4	55618.3	66658.8	54012	130692	125042	136846	-	-	1.27731	0.000185893	2.22691	1.15504	up	-	-	-	-	-	-	-	-	-	-	-	-	-	-	-
C24H22O14	Kaempferol-3-O-(6''-malonyl)galactoside*	Flavonoids	Flavonols	-	3	10874.1	27070.7	24322	1.48244e+06	1.55508e+06	1.07715e+06	437352	709654	64042.3	35033.2	23208.9	8803.96	-	-	1.09374	0.178258	0.055362	-4.17496	down	-	-	-	-	-	1.12371	0.177258	19.4493	4.28165	up	1.2565	0.0118292	66.0812	6.04617	up
C24H38N6O8	Tyr-Gln-Thr-Lys	Amino acids and derivatives	Amino acids and derivatives	-	3	311206	178200	255030	4.06215e+06	4.07622e+06	3.60703e+06	5.51306e+06	5.30191e+06	5.40531e+06	1.65183e+06	1.62556e+06	1.70828e+06	-	-	1.29623	3.9068e-05	0.307372	-1.70194	down	-	-	-	-	-	1.30338	1.70801e-06	21.7887	4.44551	up	1.25987	0.00101581	15.7776	3.9798	up
C16H16O8	3-O-caffeoylshikimic acid	Phenolic acids	Phenolic acids	-	1	198002	246407	108323	508779	600500	543536	183127	212902	188992	537689	617493	555782	-	-	1.28819	0.00158493	2.92462	1.54825	up	1.21405	0.00270624	0.353954	-1.49836	down	-	-	-	-	-	1.17119	0.00284624	2.99026	1.58027	up
C18H32O4	9S-Hydroperoxy-10E,12Z-octadecadienoic acid	Lipids	Free fatty acids	5502-91-0	3	266839	283467	375605	468678	493875	532541	105777	83917.8	84055	553329	635413	567428	C14827	ko00591,ko01100	1.29104	0.00136712	6.41524	2.6815	up	1.21811	0.000611576	0.183099	-2.44931	down	1.28039	0.0195781	0.295654	-1.75802	down	-	-	-	-	-
C9H19NO4	D-Panthenol	Others	Alcohol compounds	81-13-0	3	132267	375765	225824	66190.5	47687.2	65707.9	51706.9	64881.1	44935.4	65790.1	46974.2	68127.6	C05944	ko00770	-	-	-	-	-	-	-	-	-	-	1.20005	0.113881	0.220102	-2.18375	down	1.14198	0.120094	0.244715	-2.03082	down
C16H23N5O5	Isopentenyladenine-7-N-glucoside	Nucleotides and derivatives	Nucleotides and derivatives	-	3	8.02189e+06	3.98744e+06	5.8809e+06	4.46792e+06	3.87352e+06	3.63361e+06	1.80302e+06	2.143e+06	2.12186e+06	3.28506e+06	3.6279e+06	4.01733e+06	-	-	-	-	-	-	-	-	-	-	-	-	1.21253	0.0761629	0.339173	-1.55991	down	-	-	-	-	-
C24H32N6O6	Tyr-Tyr-Arg	Amino acids and derivatives	Amino acids and derivatives	-	3	828079	115534	216956	2.36571e+06	2.75369e+06	3.05781e+06	2.62941e+06	2.47586e+06	2.47942e+06	752335	822233	763424	-	-	1.29479	0.000144582	0.308251	-1.69782	down	-	-	-	-	-	1.16474	0.00807558	6.53532	2.70826	up	1.12956	0.00151578	7.04586	2.81678	up
C17H20N4O6	Riboflavin (Vitamin B2)	Others	Vitamin	83-88-5	1	3.76751e+06	3.60384e+06	5.37389e+06	1.17781e+06	1.26732e+06	1.50238e+06	1.0144e+06	755606	556388	675896	637946	728004	C00255	ko00740,ko01100,ko01110,ko01240,ko02010	-	-	-	-	-	-	-	-	-	-	1.26967	0.0208067	0.182531	-2.45379	down	1.23579	0.0320341	0.309725	-1.69094	down
C6H14O5	L-Fucitol	Others	Saccharides	13074-06-1	2	765434	386102	453483	629660	650612	703528	363055	377983	431246	943082	939368	889158	-	-	1.28634	4.86399e-05	2.36428	1.2414	up	-	-	-	-	-	-	-	-	-	-	-	-	-	-	-
C20H32N6O8	Ile-Thr-His-Asp	Amino acids and derivatives	Amino acids and derivatives	-	3	26374.3	52191.2	29784.5	63120.7	63474.7	63548.7	161803	139461	159082	24248.6	34265.8	26615.3	-	-	1.28563	0.00086699	0.184926	-2.43498	down	1.21715	0.0060366	2.42104	1.27562	up	1.25629	0.000439771	4.24869	2.08702	up	-	-	-	-	-
C8H8O2	Phenyl acetate	Phenolic acids	Phenolic acids	122-79-2	3	609249	661805	624270	320747	269645	299997	255204	257095	273558	264164	251371	246200	C00548	-	-	-	-	-	-	-	-	-	-	-	1.30662	0.000556692	0.41463	-1.2701	down	1.25544	0.000101824	0.469782	-1.08994	down
C6H14O12P2	D-Fructose-1,6-biphosphate	Others	Saccharides	488-69-7	3	119351	90619.7	104070	236868	227969	232128	129736	149266	127572	101389	109314	20528.3	C00354	ko00400,ko00710,ko01100,ko01110,ko01200	-	-	-	-	-	-	-	-	-	-	-	-	-	-	-	1.24428	0.00216353	2.21935	1.15013	up
C49H48O20	1,3,6-Tri-p-coumaroyl-6'-feruloyl sucrose	Phenolic acids	Phenolic acids	-	3	58913.7	454666	328971	47098.9	54207.9	48333.5	105575	119051	119315	47857.4	39061.2	45618.4	-	-	1.2816	0.000622652	0.385348	-1.37577	down	1.21205	0.00122898	2.29846	1.20067	up	-	-	-	-	-	-	-	-	-	-
C10H18N2O4	Hyp-Val	Amino acids and derivatives	Amino acids and derivatives	-	3	445700	221878	157748	91965.6	57991.6	79375.2	121537	99568.3	127125	213017	121712	233821	-	-	-	-	-	-	-	-	-	-	-	-	1.00963	0.2091	0.421931	-1.24492	down	1.10538	0.148932	0.277869	-1.84752	down
C10H13N5O4	2'-Deoxyguanosine	Nucleotides and derivatives	Nucleotides and derivatives	961-07-9	2	83924.8	148120	88821.3	125197	150567	140018	160637	148263	150946	348358	330199	325858	C00330	ko00230,ko01100,ko01232,ko02010	1.29269	0.000144008	2.18425	1.12713	up	-	-	-	-	-	-	-	-	-	-	-	-	-	-	-
C22H24O11	Hesperetin-5-O-glucoside	Flavonoids	Flavanones	69651-80-5	2	187094	303875	301065	133833	130329	183896	232333	280632	265401	91329.6	72834.7	65551.1	-	-	1.2752	0.001339	0.295125	-1.7606	down	-	-	-	-	-	-	-	-	-	-	-	-	-	-	-
C23H33N5O10	Gly-Thr-Phe-Thr-Asp	Amino acids and derivatives	Amino acids and derivatives	-	3	335400	291970	297827	1.62229e+06	887048	523458	1.04364e+06	1.24718e+06	877024	1.21315e+06	943115	1238700	-	-	-	-	-	-	-	-	-	-	-	-	1.28945	0.0185675	3.42396	1.77567	up	1.08617	0.161559	3.27801	1.71282	up
C12H14N2	1,8-dimethyl-1,3a,8,8a-tetrahydropyrrolo[2,3-b]indole	Alkaloids	Plumerane	-	2	1.85177e+06	1.27783e+06	1.03827e+06	2.36765e+07	2.27803e+07	2.28031e+07	9.2906e+06	1.09721e+07	1.02827e+07	8.3038e+06	8.7221e+06	9.71522e+06	-	-	-	-	-	-	-	1.21456	0.00010036	0.441026	-1.18106	down	1.29126	0.000597296	7.32878	2.87357	up	1.26216	8.93012e-07	16.6176	4.05464	up
C9H13N3O5	Cytidine	Nucleotides and derivatives	Nucleotides and derivatives	65-46-3	3	3.75795e+06	4.3275e+06	4.08478e+06	1.24052e+06	1.2991e+06	1.24049e+06	1.04389e+06	1.26941e+06	1.23473e+06	3.60553e+06	3.4088e+06	3.60228e+06	C00475	ko00240,ko01100,ko01232,ko02010	1.28826	1.6893e-05	2.99226	1.58123	up	-	-	-	-	-	1.30165	0.000936601	0.291533	-1.77827	down	1.26615	0.00311002	0.310603	-1.68686	down
C5H10N2O3S	L-Cysteinyl-L-glycine	Amino acids and derivatives	Amino acids and derivatives	19246-18-5	3	2.49276e+06	1.78052e+06	2.30149e+06	354004	307370	629725	733356	773974	707780	762664	607908	729551	C01419	ko00480,ko01100	-	-	-	-	-	-	-	-	-	-	1.28413	0.0200766	0.33691	-1.56956	down	1.22132	0.00587988	0.196371	-2.34834	down
C4H4O4	Fumaric acid	Organic acids	Organic acids	110-17-8	1	4.47224e+06	2.40104e+06	4.13683e+06	1.90401e+06	1.64267e+06	2.12348e+06	1.01511e+06	1.01265e+06	948134	1.49476e+06	1.54977e+06	1.40674e+06	C00122	ko00020,ko00190,ko00220,ko00250,ko00350,ko00360,ko00620,ko00650,ko00760,ko01100,ko01110,ko01200	-	-	-	-	-	-	-	-	-	-	1.24887	0.0527658	0.270288	-1.88743	down	-	-	-	-	-
C6H11NO2	N-Methyl-L-proline	Amino acids and derivatives	Amino acids and derivatives	475-11-6	1	2.17822e+06	3.42532e+06	2.74236e+06	1.39397e+07	1.41226e+07	1.30585e+07	5.04706e+06	5.05257e+06	5.35928e+06	8.5159e+06	8.55135e+06	8.27044e+06	C22223	-	-	-	-	-	-	1.22099	0.000607673	0.375939	-1.41143	down	-	-	-	-	-	1.25393	2.52201e-05	4.92705	2.30072	up
C13H16O9	Protocatechuic acid-4-O-glucoside	Phenolic acids	Phenolic acids	-	2	5.74616e+07	5.60553e+07	4.09975e+07	2.82337e+07	2.81135e+07	3.06732e+07	1.70506e+07	2.27734e+07	2.20373e+07	3.21477e+07	1.89082e+07	3.3408e+07	-	-	-	-	-	-	-	-	-	-	-	-	1.25073	0.0191493	0.400359	-1.32063	down	-	-	-	-	-
C15H19N3O4	Thr-Trp	Amino acids and derivatives	Amino acids and derivatives	-	3	12481876	2.30362e+07	1.96331e+07	6.8399e+06	6.30218e+06	5.81221e+06	4.23079e+06	4.47532e+06	3.32822e+06	2.93674e+06	3.30475e+06	3.24878e+06	-	-	-	-	-	-	-	-	-	-	-	-	1.26535	0.0422531	0.218207	-2.19623	down	1.19255	0.0592455	0.343679	-1.54087	down
C30H46O4	3-Hydroxy-11-oxours-12-en-28-oic acid (11-Keto-ursolic acid)	Terpenoids	Triterpene	105870-59-5	3	50768	178677	65831.2	76902.3	47977.3	54903.2	152161	145215	119453	76306.8	73171.4	83362.9	-	-	-	-	-	-	-	1.14622	0.00416778	2.31851	1.2132	up	-	-	-	-	-	-	-	-	-	-
C22H22O12	Isorhamnetin-3-O-Glucoside*	Flavonoids	Flavonols	5041-82-7	3	255489	69811	190575	416783	455351	472981	221355	370661	222224	243444	244400	182060	-	-	-	-	-	-	-	-	-	-	-	-	-	-	-	-	-	1.02274	0.0281207	2.60744	1.38264	up
C6H15O9P	Sorbitol-6-phosphate	Others	Saccharides	20479-58-7	2	283794	63919.9	55015	383481	391781	418986	31470	35260.6	192644	345069	343178	323145	C01096	ko00051,ko01100	1.07329	0.0400138	3.89934	1.96323	up	1.03636	0.0240989	0.217187	-2.20299	down	-	-	-	-	-	1.01459	0.0690511	2.96539	1.56822	up
C4H6O5	L-Malic acid	Organic acids	Organic acids	97-67-6	1	1.39371e+07	7.34532e+06	1.44824e+07	5.67513e+06	4.79917e+06	5.88354e+06	3.66125e+06	3.85833e+06	3.56347e+06	3.66718e+06	3.72218e+06	4.05435e+06	C00149	ko00020,ko00620,ko00630,ko00710,ko01100,ko01110,ko01200	-	-	-	-	-	-	-	-	-	-	1.2168	0.0694853	0.309887	-1.69018	down	1.08769	0.103156	0.457373	-1.12856	down
C20H28O3	Cafestol	Terpenoids	Ditepenoids	469-83-0	3	710874	391724	752053	297873	418565	337011	352555	191660	329164	462360	479183	109604	C09066	-	-	-	-	-	-	-	-	-	-	-	1.03859	0.0859031	0.470913	-1.08647	down	-	-	-	-	-
C11H9O2N	Pyran[3,4-b]indole-2-ketone	Alkaloids	Plumerane	-	1	2.0044e+06	1.95869e+06	1.9611e+06	1.40812e+07	1.65347e+07	1.57681e+07	1.73974e+06	1.8312e+06	1.80881e+06	6.44698e+06	5.78337e+06	5.98734e+06	-	-	1.29477	0.00176851	3.38635	1.75973	up	1.22244	0.00276665	0.115983	-3.10802	down	-	-	-	-	-	1.2685	0.00286512	7.82958	2.96894	up
C9H12NO6P	O-phosphate-L-tyrosine	Amino acids and derivatives	Amino acids and derivatives	21820-51-9	3	238129	181682	191271	426070	467089	444627	655771	709571	763975	461719	391387	508512	C06501	-	-	-	-	-	-	-	-	-	-	-	1.29607	0.00060363	3.4845	1.80095	up	1.24017	0.000644584	2.18921	1.13041	up
C26H30O11	tortoside f	Lignans and Coumarins	Lignans	-	3	3.22431e+06	4.066e+06	3.18604e+06	4.50687e+06	4.69714e+06	5.07816e+06	1.68685e+06	1.10713e+06	1.42858e+06	2.84501e+06	2.37148e+06	3.01471e+06	-	-	-	-	-	-	-	1.19845	0.000145667	0.295652	-1.75803	down	1.24776	0.00660832	0.403057	-1.31095	down	-	-	-	-	-
C15H24N6O5S1	His-Met-Asn	Amino acids and derivatives	Amino acids and derivatives	-	3	1.18505e+06	245577	726029	2.83544e+06	2.83729e+06	2812248	3.70625e+06	3.4574e+06	3.6589e+06	7374550	2.41673e+06	2.56881e+06	-	-	-	-	-	-	-	-	-	-	-	-	1.1673	0.00559516	5.01822	2.32717	up	1.08572	0.016066	3.93433	1.97612	up
C7H11N3O2	1-Methylhistidine	Amino acids and derivatives	Amino acids and derivatives	332-80-9	2	488027	683450	452835	1.17339e+06	1.19117e+06	1.14052e+06	678679	801766	748045	934215	877941	882715	-	-	-	-	-	-	-	-	-	-	-	-	-	-	-	-	-	1.21289	0.0103715	2.15789	1.10962	up
C22H26O12	3-O-p-Coumaroylshikimic acid-O-glucoside	Phenolic acids	Phenolic acids	-	3	18797.1	12734	16841.4	127841	137827	112616	107760	91230.8	118863	95099.4	71437.4	90792.1	-	-	-	-	-	-	-	-	-	-	-	-	1.29669	0.00589175	6.57095	2.7161	up	1.25899	0.00291249	7.82024	2.96721	up
C31H58O14	1-Palmitoyl-Sn-Glycerol 3-O-Diglucoside	Lipids	Glycerol ester	-	1	326300	273225	369419	185947	175652	186551	118168	129883	110554	178349	155100	178884	-	-	-	-	-	-	-	-	-	-	-	-	1.28353	0.0152405	0.370099	-1.43402	down	-	-	-	-	-
C19H34N6O9S	Asp-Lys-Ser-Cys-Ala	Amino acids and derivatives	Amino acids and derivatives	-	3	197068	477321	283040	1.46919e+06	1.41155e+06	1.42555e+06	498547	560548	549046	1.48517e+06	1.32809e+06	1.39845e+06	-	-	1.29049	0.000753467	2.61899	1.38901	up	1.21988	4.37027e-06	0.37344	-1.42105	down	-	-	-	-	-	1.20923	0.00408629	4.49776	2.16921	up
C9H10O3	3-(3-Hydroxyphenyl)-propionic acid	Phenolic acids	Phenolic acids	621-54-5	2	372600	256168	256322	3.42182e+06	3.70994e+06	3.82643e+06	3.0278e+06	3.30984e+06	3.05049e+06	1.86788e+06	1.53516e+06	1.72511e+06	C11457	ko00360,ko01100	-	-	-	-	-	-	-	-	-	-	1.30302	0.000188513	10.607	3.40694	up	1.2637	0.000491155	12.3809	3.63004	up
C25H46NO7P	LysoPE 20:3	Lipids	LPE	-	3	19927	10751.3	20255.8	38619.9	37046.7	36395	12440.5	24803.4	17777.5	11997.4	17547.6	27856.2	-	-	-	-	-	-	-	1.07932	0.0301866	0.490992	-1.02623	down	-	-	-	-	-	1.12744	0.018944	2.20013	1.13759	up
C25H46NO7P	LysoPE 20:3(2n isomer)	Lipids	LPE	-	3	19927	10751.3	20255.8	38619.9	37046.7	36395	12440.5	24803.4	17777.5	11997.4	17547.6	27856.2	-	-	-	-	-	-	-	1.07932	0.0301866	0.490992	-1.02623	down	-	-	-	-	-	1.12744	0.018944	2.20013	1.13759	up
C51H78O19	Marstenacisside A6	Steroids	Steroidal saponins	-	1	3.77009e+07	5.77951e+06	1.53194e+07	4.16837e+07	4.04737e+07	3.48428e+07	1.51196e+07	1.52671e+07	1.45214e+07	5.63169e+06	5.76226e+06	5.9322e+06	-	-	1.29558	0.000135127	0.385813	-1.37402	down	1.21527	0.0070788	0.383829	-1.38146	down	-	-	-	-	-	-	-	-	-	-
C18H26O3	4-Oxo-9Z,11Z,13E,15E-Octadecatetraenoic Acid	Lipids	Free fatty acids	-	3	402178	828715	389436	232202	225052	247666	637188	650891	614944	704851	670460	661150	-	-	-	-	-	-	-	1.22094	2.44257e-05	2.69963	1.43276	up	-	-	-	-	-	1.05938	0.168583	0.435047	-1.20076	down
C15H20O9	Dihydrocaffeoylglucose	Phenolic acids	Phenolic acids	-	3	207768	146710	204207	371701	419749	404822	377308	315539	316191	154552	144299	158671	-	-	1.27918	0.00976698	0.453424	-1.14107	down	-	-	-	-	-	-	-	-	-	-	1.21003	0.0014592	2.14123	1.09844	up
C12H18O11	Isoascorbic acid 2-O-glucoside	Others	Vitamin	-	2	4.73379e+06	3.89421e+06	4.13493e+06	1.03886e+07	1.09455e+07	1.29543e+07	3.74699e+06	4.61531e+06	4.69288e+06	3.88343e+06	2.45355e+06	3.57562e+06	-	-	-	-	-	-	-	1.19838	0.00588893	0.380746	-1.3931	down	-	-	-	-	-	1.24973	0.00699144	2.68657	1.42576	up
C4H5N3O	Cytosine	Nucleotides and derivatives	Nucleotides and derivatives	71-30-7	3	2.7274e+06	2.37876e+06	2.94154e+06	3.96241e+06	4.19307e+06	4.23701e+06	1.42039e+06	1.43372e+06	1.79886e+06	3.22878e+06	3.15545e+06	3.13203e+06	C00380	ko00240,ko01100,ko01232	1.26775	0.00405469	2.04521	1.03225	up	1.20674	0.000154627	0.375466	-1.41325	down	-	-	-	-	-	-	-	-	-	-
C12H14N2O	Acetryptine	Alkaloids	Plumerane	3551-18-6	3	28395.4	45233.6	21438.9	86086.7	70343.1	85406.6	59276.5	39670.6	30428.7	12568.6	52871.7	21941	-	-	-	-	-	-	-	-	-	-	-	-	-	-	-	-	-	1.1583	0.00650456	2.54383	1.347	up
C5H9N3O2	Cyclocreatine	Nucleotides and derivatives	Nucleotides and derivatives	-	3	965311	994157	1.00377e+06	6.17274e+06	6.44068e+06	6.21961e+06	802171	798451	891143	2.56274e+06	2.33047e+06	2.69082e+06	-	-	1.29052	0.0021254	3.04364	1.6058	up	1.22265	4.34086e-05	0.132308	-2.91803	down	-	-	-	-	-	1.26962	0.00018931	6.35556	2.66802	up
C8H9NO3	Pyridoxal	Others	Vitamin	66-72-8	3	738847	332572	692755	411264	426851	415231	177250	269320	233933	182103	121970	127994	C00250	ko00750,ko01100,ko01240	-	-	-	-	-	-	-	-	-	-	1.10825	0.100884	0.385734	-1.37432	down	-	-	-	-	-
C7H11NO5	N-Acetyl-L-glutamic acid	Amino acids and derivatives	Amino acids and derivatives	1188-37-0	3	1.28781e+06	1.22234e+06	892092	1.81117e+06	1.98107e+06	2.31596e+06	1.23662e+06	1.00086e+06	684176	763747	898555	1.18746e+06	C00624	ko00220,ko01100,ko01110,ko01210,ko01230	-	-	-	-	-	1.101	0.00835142	0.478317	-1.06396	down	-	-	-	-	-	-	-	-	-	-
C20H42NO7P	LysoPE 15:0	Lipids	LPE	-	3	139208	273849	241971	132758	141306	104658	96639.9	121862	107192	100988	121429	123267	-	-	-	-	-	-	-	-	-	-	-	-	1.09934	0.109665	0.497221	-1.00804	down	-	-	-	-	-
C23H32N4O11	Glu-Thr-Tyr-Glu	Amino acids and derivatives	Amino acids and derivatives	-	3	149559	125906	73294.6	970188	1.17072e+06	1.18271e+06	1.15577e+06	1.09984e+06	1.25351e+06	978989	944047	889964	-	-	-	-	-	-	-	-	-	-	-	-	1.28851	0.000265566	10.0617	3.3308	up	1.24907	0.00236769	9.52983	3.25245	up
C8H14N2O5	Hyp-Ser	Amino acids and derivatives	Amino acids and derivatives	-	3	519009	686659	444559	274886	230687	231016	323353	310102	280343	318070	305062	306781	-	-	-	-	-	-	-	-	-	-	-	-	-	-	-	-	-	1.19232	0.0460844	0.446356	-1.16373	down
C19H30N6O11	Glu-Asn-Gln-Glu	Amino acids and derivatives	Amino acids and derivatives	-	3	35553.9	68206	52780.1	690409	692384	672025	690644	662711	616045	1.16896e+06	1.18033e+06	1.06841e+06	-	-	-	-	-	-	-	-	-	-	-	-	1.29387	0.000253375	12.5808	3.65315	up	1.25726	2.46939e-06	13.1265	3.71441	up
C17H20O9	Chlorogenic acid methyl ester	Phenolic acids	Phenolic acids	29708-87-0	2	4.49134e+06	1.34893e+06	7.20803e+06	33878912	3.39173e+07	3.29683e+07	1.07729e+07	1.06861e+07	1.18407e+07	9.10442e+06	1.00252e+07	9.25154e+06	-	-	-	-	-	-	-	1.22101	1.79897e-06	0.330471	-1.59741	down	-	-	-	-	-	1.15477	0.00257874	7.72243	2.94905	up
C11H14N2O3	Glycylphenylalanine	Amino acids and derivatives	Amino acids and derivatives	3321-03-7	2	688512	905117	699492	306353	309705	294935	484165	529876	588141	659628	785674	612231	-	-	-	-	-	-	-	-	-	-	-	-	-	-	-	-	-	1.24367	0.0222229	0.397272	-1.3318	down
C17H20O6	(2S)-3,3-bis-(4-hydroxy-3-methoxyphenyl)-propane-1,2-diol	Others	Others	-	2	50701.2	74342.3	38040.3	433784	430251	421887	159626	185931	186406	126391	139252	155665	-	-	-	-	-	-	-	1.21489	0.000298287	0.413682	-1.27341	down	1.24243	0.00102758	3.2619	1.70571	up	1.25199	0.000266211	7.88504	2.97912	up
C17H22O10	4-O-Glucosyl-sinapate	Phenolic acids	Phenolic acids	-	3	83214.9	48427.3	57349.1	213098	217274	207841	290441	318105	272619	46416.9	57690.8	65449.4	C02919	-	1.28578	0.000900243	0.192424	-2.37764	down	-	-	-	-	-	1.28298	0.00022783	4.66246	2.22109	up	1.22921	0.00302904	3.37694	1.75572	up
C16H26O4	6-Hydroxyphomodiol	Others	Others	-	3	2.9803e+06	3.94315e+06	3.37747e+06	1.95334e+06	1.92452e+06	1.73656e+06	1.74219e+06	1.81107e+06	1.54754e+06	1.19547e+06	1.1659e+06	1.28273e+06	-	-	-	-	-	-	-	-	-	-	-	-	1.26662	0.0187955	0.495179	-1.01398	down	-	-	-	-	-
C22H24O8	Comazaphilone E	Others	Others	-	3	4.87409e+06	2.15441e+06	4.00385e+06	1.34355e+07	1.41142e+07	1.40483e+07	3.97245e+06	4.26188e+06	6.19628e+06	6.41901e+06	6.2503e+06	6.60861e+06	-	-	-	-	-	-	-	1.18313	0.00323271	0.346907	-1.52738	down	-	-	-	-	-	1.19272	0.00388722	3.77054	1.91477	up
C5H4N4O2	Xanthine	Nucleotides and derivatives	Nucleotides and derivatives	69-89-6	3	23127.8	26509.8	27904.1	71191.3	71771.8	91158.1	32675	19703.7	13589.7	29639.5	34188.3	49375.4	C00385	ko00230,ko00232,ko01100,ko01110,ko01232	-	-	-	-	-	1.13764	0.00315509	0.28177	-1.82741	down	-	-	-	-	-	1.24903	0.0124416	3.01929	1.59421	up
C21H18O13	3,4-Digalloylshikimic acid	Phenolic acids	Phenolic acids	-	3	5.05902e+06	2.68304e+06	4.17223e+06	968526	1.06202e+06	984386	377881	292654	308612	402730	314648	293865	-	-	-	-	-	-	-	1.21134	6.84241e-05	0.324766	-1.62253	down	1.29064	0.0341548	0.0821826	-3.60502	down	1.22448	0.0502767	0.253051	-1.9825	down
C15H22N2O4	Sinapoylputrescine	Alkaloids	Phenolamine	70185-57-8	3	400767	323839	261334	4.95479e+06	4.98815e+06	5.12074e+06	2.32794e+06	2.5714e+06	2.3006e+06	2.32006e+06	2.52595e+06	2.57387e+06	-	-	-	-	-	-	-	1.21817	6.96035e-05	0.477967	-1.06502	down	1.2998	0.00030213	7.30262	2.86841	up	1.26588	4.03272e-07	15.2785	3.93343	up
C61H84O25	Marstenacisside B4	Steroids	Steroidal saponins	-	1	797022	3.55966e+06	1.65041e+06	1.46271e+06	1.35744e+06	1.34346e+06	4.48811e+06	4.475e+06	4.36048e+06	2.28025e+06	2.21424e+06	2.49212e+06	-	-	-	-	-	-	-	1.22223	6.87363e-07	3.20001	1.67808	up	-	-	-	-	-	-	-	-	-	-
C7H6O4	2,3-Dihydroxybenzoic Acid*	Phenolic acids	Phenolic acids	303-38-8	3	1.54197e+06	1.45917e+06	2.02504e+06	1.02847e+06	992502	1.04549e+06	410764	669275	718807	795202	632200	735450	C00196	ko01110	-	-	-	-	-	-	-	-	-	-	1.22312	0.0118723	0.357895	-1.48239	down	-	-	-	-	-
C13H14N2O2	2-[(9R)-1,2,3,9-tetrahydropyrrolo[2,1-b]quinazolin-9-yl]acetic acid	Alkaloids	Alkaloids	-	2	2.92931e+06	4.23498e+06	3.6627e+06	2.30924e+07	2.50708e+07	2.56351e+07	1.0046e+07	9.9395e+06	1.02618e+07	9.3407e+06	9.31079e+06	1.00976e+07	-	-	-	-	-	-	-	1.22028	0.00248501	0.409864	-1.28678	down	1.28042	0.00211447	2.79369	1.48217	up	1.26183	0.000185141	6.81614	2.76896	up
C14H24N6O8	Asp-Arg-Asp	Amino acids and derivatives	Amino acids and derivatives	-	3	38090.3	99567.3	21345.1	195135	240136	229156	616252	579308	542372	435280	481397	431713	-	-	-	-	-	-	-	1.20945	0.000391761	2.61569	1.38719	up	1.2361	8.61172e-05	10.9302	3.45025	up	1.1177	0.00729926	4.17871	2.06306	up
C26H34O11	Dihydrodehydrodiconiferyl alcohol-4-O-glucoside	Lignans and Coumarins	Lignans	-	2	243977	396746	380788	1.63452e+06	1.58906e+06	1.784e+06	872472	922028	926745	1.05332e+06	1.01363e+06	914212	-	-	-	-	-	-	-	-	-	-	-	-	1.24673	0.00348728	2.66394	1.41356	up	1.24527	8.22947e-05	4.90213	2.29341	up
C13H16O8	Salicylic acid-2-O-glucoside	Phenolic acids	Phenolic acids	10366-91-3	3	1.41536e+06	3.01215e+06	1.46412e+06	8.07633e+06	7.78e+06	7.41315e+06	5.67208e+06	7.08673e+06	6.34291e+06	7.67519e+06	7.15395e+06	7.08108e+06	-	-	-	-	-	-	-	-	-	-	-	-	1.208	0.00329818	3.24218	1.69697	up	1.20502	0.00389702	3.94959	1.9817	up
C12H17N5O5	2-(Dimethylamino)guanosine	Nucleotides and derivatives	Nucleotides and derivatives	2140-67-2	3	501366	358229	562301	332360	373800	334550	177254	196593	211185	253003	292227	283412	-	-	-	-	-	-	-	-	-	-	-	-	1.24254	0.0408479	0.411445	-1.28123	down	-	-	-	-	-
C9H13N2O9P	Uridine 5'-monophosphate	Nucleotides and derivatives	Nucleotides and derivatives	58-97-9	3	288673	230403	243330	156944	174885	184519	425563	404414	514841	676861	725156	684276	C00105	ko00240,ko01100,ko01232,ko01240	-	-	-	-	-	1.20484	0.0112528	2.60448	1.38099	up	-	-	-	-	-	-	-	-	-	-
C19H32N4O9S	Leu-Glu-Cys-Glu	Amino acids and derivatives	Amino acids and derivatives	-	3	39429.5	28020.8	14449.6	296663	337269	285503	437523	494542	519181	485652	510897	512992	-	-	-	-	-	-	-	-	-	-	-	-	1.28454	0.00140063	17.7198	4.14729	up	1.23833	0.000747908	11.2263	3.48881	up
C14H20O9	Koaburaside	Phenolic acids	Phenolic acids	41653-73-0	1	1.55394e+06	674743	1.19766e+06	2.43446e+06	2.39098e+06	2.20811e+06	812286	715567	758112	1.09924e+06	1.17603e+06	1.11342e+06	-	-	-	-	-	-	-	1.21958	0.000513393	0.325009	-1.62145	down	-	-	-	-	-	1.06468	0.034724	2.05279	1.03758	up
C14H18N2O6	γ-Glutamyltyrosine	Amino acids and derivatives	Amino acids and derivatives	7432-23-7	1	1.61353e+06	1.75787e+06	495735	7.14609e+06	7.74989e+06	7.75146e+06	728139	716354	780105	1.07141e+06	896268	999403	-	-	-	-	-	-	-	1.22298	0.000793084	0.0982274	-3.34773	down	-	-	-	-	-	1.17384	0.000846507	5.85639	2.55001	up
C22H24O7	Pyramidatin F	Others	Others	-	3	1.12286e+06	421182	795510	3.01519e+06	2.6277e+06	2.62905e+06	3.3017e+06	3.1846e+06	2.88653e+06	2.52039e+06	2.49387e+06	2.50523e+06	-	-	-	-	-	-	-	-	-	-	-	-	1.22089	0.00144802	4.00624	2.00225	up	1.16146	0.00234881	3.53569	1.82199	up
C28H46O12	Tricalysioside O	Terpenoids	Ditepenoids	874332-47-5	3	2.60529e+06	1.52122e+06	3.48922e+06	1.26308e+06	263157	342417	359713	380338	379055	739991	714089	747615	-	-	-	-	-	-	-	-	-	-	-	-	1.26611	0.0626222	0.146947	-2.76663	down	1.05436	0.0572306	0.245367	-2.02699	down
C15H20N4O6	Asn-Tyr-Gly	Amino acids and derivatives	Amino acids and derivatives	-	3	29751.5	45541.4	16403.5	5.44166e+06	5.56824e+06	6.2088e+06	2.50179e+06	2.64687e+06	2.76166e+06	3.49168e+06	3.41518e+06	3.4651e+06	-	-	-	-	-	-	-	1.21334	0.00309706	0.459403	-1.12217	down	1.29831	0.000728469	86.2665	6.43073	up	1.26398	0.00170568	187.78	7.5529	up
C15H14O10	2-O-P-Coumaroylhydroxycitric Acid	Phenolic acids	Phenolic acids	-	2	205227	108973	174076	311451	290268	275343	114045	103918	99197.7	92395.8	51551.6	76640.6	-	-	-	-	-	-	-	1.21741	0.000912586	0.361617	-1.46746	down	-	-	-	-	-	-	-	-	-	-
C5H9NO4	L-threo-3-Methylaspartate	Amino acids and derivatives	Amino acids and derivatives	6061-13-8	1	9.54484e+06	7.49668e+06	5.42056e+06	1.65586e+07	1.63563e+07	1.62856e+07	7.95821e+06	8.80587e+06	9.52133e+06	1.39799e+07	1.34245e+07	1.31215e+07	C03618	ko00630,ko00660,ko01100,ko01200	-	-	-	-	-	-	-	-	-	-	-	-	-	-	-	1.18217	0.0170103	2.19038	1.13118	up
C21H42NO7P	LysoPE 16:1	Lipids	LPE	-	3	483912	71042.6	253404	520342	561725	542171	190944	201592	197528	109178	144539	134244	-	-	-	-	-	-	-	1.22198	0.000631289	0.363287	-1.46082	down	-	-	-	-	-	-	-	-	-	-
C25H48NO7P	LysoPE 20:2(2n isomer)	Lipids	LPE	-	3	8725.11	15508.1	18565.9	14548.4	9890.64	18252.9	4608.88	6227.19	7600.39	19039.8	20904.9	17135.9	-	-	1.25123	0.000950713	3.09607	1.63044	up	1.06734	0.0655835	0.431849	-1.2114	down	1.09716	0.0976498	0.430768	-1.21502	down	-	-	-	-	-
C5H8O4	2-Methylsuccinic acid	Organic acids	Organic acids	498-21-5	3	2.86398e+06	3.49319e+06	4.80487e+06	2.15534e+06	1.88886e+06	1.89244e+06	2.0507e+06	1.67997e+06	1.7055e+06	3.25841e+06	3.32282e+06	3.61682e+06	-	-	-	-	-	-	-	-	-	-	-	-	1.18785	0.0735026	0.487023	-1.03794	down	-	-	-	-	-
C14H20N6O7	His-Asn-Asp	Amino acids and derivatives	Amino acids and derivatives	-	3	1.70807e+06	979162	811932	3.26896e+07	2.62735e+07	3.14974e+07	1.57184e+07	1.84681e+07	1.70189e+07	1.41115e+07	1.30683e+07	1.3516e+07	-	-	-	-	-	-	-	-	-	-	-	-	1.293	0.00097214	14.6336	3.87121	up	1.25854	0.00399537	25.8521	4.69221	up
C22H22O11	Isorhamnetin-3-O-rhamnoside	Flavonoids	Flavonols	-	3	59430.2	82407.8	40381.5	49895.2	36724	53721.8	230048	215822	149123	43183.7	45132	56910.4	-	-	1.26438	0.0238575	0.24408	-2.03457	down	1.18651	0.0222885	4.23962	2.08394	up	1.21279	0.0170727	3.26525	1.7072	up	-	-	-	-	-
C30H48O3	24,30-Dihydroxy-12(13)-ene-lupeol	Terpenoids	Triterpene	-	1	1.01184e+06	923177	379632	193462	219991	220894	186748	193059	187803	204299	235412	225573	-	-	-	-	-	-	-	-	-	-	-	-	1.18179	0.0984355	0.245225	-2.02782	down	1.11845	0.104906	0.274058	-1.86745	down
C18H28N4O11	Glu-Asp-Val-Asp	Amino acids and derivatives	Amino acids and derivatives	-	3	1.54113e+07	2.09065e+07	2.12957e+07	4.45497e+07	4.60411e+07	4.62019e+07	4.04624e+07	4.22945e+07	3.88319e+07	5.18217e+07	5.16341e+07	5.09462e+07	-	-	-	-	-	-	-	-	-	-	-	-	1.25707	0.00208332	2.11042	1.07753	up	1.23345	0.00309682	2.37431	1.24751	up
C15H22N6O7	His-Asn-Glu	Amino acids and derivatives	Amino acids and derivatives	-	3	4.03287e+06	5.58582e+06	5.85236e+06	1.37675e+06	1.29297e+06	1.37539e+06	1.4968e+06	1.28722e+06	1.209e+06	2.80623e+06	2.57373e+06	2.49149e+06	-	-	-	-	-	-	-	-	-	-	-	-	1.28574	0.0193748	0.258096	-1.95402	down	1.25106	0.0212628	0.261463	-1.93532	down
C11H9NO2	naphthisoxazol A	Alkaloids	Alkaloids	-	3	2.15783e+06	2038571	2.18303e+06	1.47779e+07	1.67314e+07	1.5204e+07	1.72754e+06	1.90488e+06	1.95806e+06	6.51407e+06	5.74209e+06	5.77878e+06	-	-	1.29113	0.00208791	3.22601	1.68975	up	1.22205	0.0016506	0.119677	-3.06279	down	-	-	-	-	-	1.26841	0.00184545	7.32247	2.87233	up
C15H22NO4+	Feruloylcholine	Alkaloids	Phenolamine	85927-25-9	3	64818.7	37059.1	17168.1	291488	324137	103105	149822	180772	175771	147911	181354	159773	-	-	-	-	-	-	-	-	-	-	-	-	1.17753	0.00244032	4.25352	2.08866	up	1.10254	0.0957293	6.03743	2.59393	up
C9H12N2O6	Uridine	Nucleotides and derivatives	Nucleotides and derivatives	58-96-8	3	1.41081e+06	1.44706e+06	1.50874e+06	718721	798807	48243.1	394624	380662	245597	635135	807002	969611	C00299	ko00240,ko01100,ko01232,ko02010	1.18174	0.0244082	2.36241	1.24026	up	-	-	-	-	-	1.28153	0.000150538	0.233793	-2.09669	down	-	-	-	-	-
C6H6N4O2	1-Methylxanthine	Nucleotides and derivatives	Nucleotides and derivatives	6136-37-4	3	15854.1	28462.1	13410	307001	329215	324501	157031	168509	140073	117407	108907	115375	C16358	ko00232,ko01100,ko01110	-	-	-	-	-	1.20959	0.000131507	0.484651	-1.04498	down	1.27831	0.000558369	8.06588	3.01183	up	1.25648	1.0361e-05	16.6427	4.05681	up
C8H8O2	4-Hydroxyacetophenone	Phenolic acids	Phenolic acids	99-93-4	3	602040	722531	660931	335349	300150	297961	290438	304269	298703	297343	248228	275984	C10700	ko01100	-	-	-	-	-	-	-	-	-	-	1.29899	0.00833748	0.449967	-1.15211	down	1.25047	0.00517531	0.470138	-1.08884	down
C8H18N2O2	N(6),N(6)-Dimethyl-L-lysine	Amino acids and derivatives	Amino acids and derivatives	2259-86-1	2	153857	880005	214210	1.91323e+06	2.22314e+06	2.18466e+06	3.23453e+06	3.15943e+06	3.36846e+06	1.79133e+06	1.83958e+06	1.88738e+06	-	-	-	-	-	-	-	-	-	-	-	-	1.1895	0.00435088	7.82199	2.96754	up	1.11417	0.009549	5.06463	2.34046	up
C15H10O5	3',4',7-Trihydroxyflavone	Flavonoids	Flavones	2150-11-0	3	62673.6	8442.2	15000.7	149621	82110.1	120368	42509.8	18194.1	48480.2	17916	69273.4	73619.5	-	-	-	-	-	-	-	1.05793	0.0361968	0.310095	-1.68922	down	-	-	-	-	-	1.03343	0.0276634	4.08864	2.03162	up
C21H20O11	Kaempferol-4'-O-glucoside	Flavonoids	Flavonols	-	3	2.35504e+06	979473	1.37738e+06	721121	186795	752113	209807	312811	208490	246362	337766	292184	-	-	-	-	-	-	-	-	-	-	-	-	1.24597	0.0821603	0.155162	-2.68815	down	-	-	-	-	-
C22H34O5	Vitexilactone	Terpenoids	Ditepenoids	61263-49-8	3	6.71875e+06	4.90657e+06	8.05319e+06	9.41947e+06	9.47385e+06	9.23538e+06	2.47384e+06	2.73405e+06	2.66265e+06	7.93687e+06	7.35406e+06	7.83478e+06	-	-	1.29371	0.000242953	2.93826	1.55496	up	1.22222	3.87809e-07	0.279804	-1.83751	down	1.24312	0.0487705	0.399956	-1.32209	down	-	-	-	-	-
C5H11NO2	L-Valine	Amino acids and derivatives	Amino acids and derivatives	72-18-4	3	1.6429e+06	1.68265e+06	1.40718e+06	2.45259e+06	2.42009e+06	2.56228e+06	921544	835817	887732	1.29907e+06	1.29016e+06	1.32044e+06	C00183	ko00280,ko00290,ko00311,ko00460,ko00770,ko00966,ko00970,ko01100,ko01110,ko01210,ko01230,ko01240,ko02010	-	-	-	-	-	1.22125	3.91768e-05	0.355764	-1.49101	down	-	-	-	-	-	-	-	-	-	-
C6H9N3O2	L-Histidine	Amino acids and derivatives	Amino acids and derivatives	71-00-1	1	48977.3	140283	31209.1	498125	545199	352039	238429	348502	262203	196215	175392	180200	C00135	ko00340,ko00410,ko00470,ko00970,ko01100,ko01110,ko01230,ko02010	-	-	-	-	-	-	-	-	-	-	1.122	0.0116204	3.85148	1.94541	up	1.16167	0.00832172	6.32904	2.66199	up
C10H19N3O4	Ile-Asn	Amino acids and derivatives	Amino acids and derivatives	59652-59-4	3	295869	442296	258881	115603	113369	110538	159954	182405	203900	286375	289707	288562	-	-	-	-	-	-	-	-	-	-	-	-	-	-	-	-	-	1.20917	0.0594198	0.340516	-1.55421	down
C11H9NO2	3,5-Dihydro-2H-Furo[3,2-C]Quinolin-4-One	Alkaloids	Quinoline alkaloids	-	3	2.24287e+06	1.85576e+06	2.01294e+06	1.41005e+07	1.5425e+07	1.55335e+07	1.65389e+06	1.72176e+06	1.80524e+06	6.0895e+06	5.88949e+06	5.56343e+06	-	-	1.29459	0.000653678	3.38598	1.75957	up	1.22278	0.00109708	0.11498	-3.12054	down	-	-	-	-	-	1.26714	0.000714425	7.37273	2.8822	up
C8H9NO3	2-Amino-3-methoxybenzoic acid	Phenolic acids	Phenolic acids	3177-80-8	3	608608	251198	546575	330219	308180	291184	170825	144890	140800	106299	87736	116375	C05831	ko00380	-	-	-	-	-	1.20161	0.000507375	0.491097	-1.02592	down	1.14901	0.101843	0.324603	-1.62325	down	-	-	-	-	-
C7H14O7	Sedoheptulose	Others	Saccharides	3019-74-7	2	3.46324e+06	2.07727e+06	2.3432e+06	6.96442e+06	6.58596e+06	6.8966e+06	3.58927e+06	3.30434e+06	3.49216e+06	6.6254e+06	6.41014e+06	7.10371e+06	C02076	ko00710,ko01100	-	-	-	-	-	-	-	-	-	-	-	-	-	-	-	1.21027	0.00679347	2.59357	1.37494	up
C28H24N2O7	Tyr-Nap-OH	Amino acids and derivatives	Amino acids and derivatives	-	3	74683	342114	100904	225774	159070	135321	57657	57498.8	28347	93781.3	79611.8	61415	-	-	-	-	-	-	-	1.12838	0.0318355	0.27588	-1.85789	down	-	-	-	-	-	-	-	-	-	-
C29H26O17	1-O-Caffeoyl-3,4-di-O-galloyl-β-D-glucose*	Phenolic acids	Phenolic acids	-	3	8803.98	3018.62	5603.25	12491.7	15582.9	14832	10107.8	15936.6	9899.93	8419.61	7164.05	12923.1	-	-	-	-	-	-	-	-	-	-	-	-	-	-	-	-	-	1.06451	0.0194744	2.46224	1.29997	up
C20H25N5O4	Pro-His-Phe	Amino acids and derivatives	Amino acids and derivatives	-	3	935803	520734	956310	284417	219989	181265	101710	145658	175897	101552	150228	167231	-	-	-	-	-	-	-	-	-	-	-	-	1.25542	0.0401653	0.175422	-2.5111	down	1.18915	0.0502814	0.284175	-1.81515	down
C15H18O8	1-O-p-Coumaroyl-β-D-glucose	Phenolic acids	Phenolic acids	7139-64-2	3	833058	1.38905e+06	835229	273418	265212	314996	595356	612821	612916	583742	587177	631556	C16827	-	-	-	-	-	-	1.21187	0.000736681	2.13336	1.09313	up	-	-	-	-	-	1.21783	0.0570142	0.279206	-1.8406	down
C22H22O9	1-O-Feruloyl-3-O-caffeoylglycerol	Phenolic acids	Phenolic acids	-	3	109125	249304	198491	474773	540822	553604	226635	276714	240505	87657.9	81266.7	75158	-	-	1.28539	0.00563643	0.328132	-1.60765	down	1.19937	0.00157018	0.474035	-1.07694	down	-	-	-	-	-	1.15388	0.00438481	2.81764	1.49448	up
C13H22N6O7	Asn-Asn-Gln	Amino acids and derivatives	Amino acids and derivatives	-	3	32043.2	227827	89287.1	853260	964687	899761	2.63972e+06	2.46902e+06	2.41012e+06	1.24311e+06	990800	1.10394e+06	-	-	1.27737	0.000158977	0.44393	-1.1716	down	1.21872	0.00033154	2.76662	1.46812	up	1.23807	1.52954e-05	21.5343	4.42856	up	1.14533	0.00104986	7.78361	2.96044	up
C54H86O24	Marstenacisside B2	Steroids	Steroidal saponins	-	1	2.08103e+06	593715	2.8777e+06	1.63603e+06	1.8721e+06	1.55787e+06	675483	679469	728151	2.15153e+06	2.2735e+06	2.13646e+06	-	-	1.29491	0.000191464	3.14986	1.65529	up	1.21236	0.00740321	0.411193	-1.28211	down	-	-	-	-	-	-	-	-	-	-
C6H9NO5	N-Acetyl-L-Aspartic Acid	Amino acids and derivatives	Amino acids and derivatives	997-55-7	3	943577	814554	884788	241391	262015	298371	128747	154400	169074	114354	86883	119459	C01042	ko00250,ko01100	-	-	-	-	-	-	-	-	-	-	1.30289	0.00118779	0.171107	-2.54703	down	1.26077	0.00098092	0.303368	-1.72086	down
C59H86O25	Marstenacisside B1	Steroids	Steroidal saponins	-	1	1.18461e+06	2.81689e+06	1.96613e+06	2.61889e+06	1.89002e+06	2.77764e+06	7.46675e+06	2.9983e+06	9.01994e+06	1.89232e+06	1.84741e+06	2.47245e+06	-	-	1.07691	0.132132	0.318819	-1.64919	down	-	-	-	-	-	1.05017	0.121971	3.26511	1.70713	up	-	-	-	-	-
C20H28O2	4-Oxoretinol	Others	Vitamin	62702-55-0	3	114522	16623.1	64861.8	132304	126780	136109	57632.3	57930.6	37123	38740.3	46968.3	32574.4	C16683	-	-	-	-	-	-	1.1723	0.00302646	0.386358	-1.37199	down	-	-	-	-	-	-	-	-	-	-
C16H18O8	3-O-p-Coumaroylquinic acid*	Phenolic acids	Phenolic acids	87099-71-6	2	3.09411e+06	1.52546e+06	3.30954e+06	2.28551e+07	2.55845e+07	2.45344e+07	3.6767e+06	3.62991e+06	3.26446e+06	3.04445e+06	3.49818e+06	2.82759e+06	-	-	-	-	-	-	-	1.22248	0.0011334	0.144861	-2.78726	down	-	-	-	-	-	1.23725	5.4737e-05	9.2033	3.20215	up
C23H31N7O4	Trp-His-Lys	Amino acids and derivatives	Amino acids and derivatives	-	3	933247	1.37338e+06	738516	97413.5	52352.4	90448.2	49753.9	50336	55487.3	79237.1	75427.3	136650	-	-	-	-	-	-	-	-	-	-	-	-	1.29998	0.0359584	0.0510902	-4.29081	down	1.24045	0.0373997	0.0788843	-3.66412	down
C25H24O12	3,5-Dicaffeoylquinic acid	Phenolic acids	Phenolic acids	-	2	94383.2	50015	24000.7	2.59662e+06	2.83106e+06	3.12094e+06	848931	777682	821461	247966	246184	185739	-	-	1.28188	3.52921e-05	0.277724	-1.84828	down	1.21836	0.00486135	0.286371	-1.80404	down	1.26286	1.29635e-05	14.5374	3.86169	up	1.2486	0.00253373	50.7642	5.66574	up
C12H22O11	D-Maltose	Others	Saccharides	69-79-4	1	1.46428e+06	587844	901330	1.23305e+06	1.36765e+06	1.10332e+06	566316	518892	609260	940239	898821	976880	C01971	-	-	-	-	-	-	1.19973	0.00736423	0.457467	-1.12826	down	-	-	-	-	-	-	-	-	-	-
C15H18O8	Phenylpropionic acid-O-β-D-glucopyranoside	Phenolic acids	Phenolic acids	-	3	393951	605729	434878	126294	122856	142563	213342	255268	274659	255792	251920	258179	-	-	-	-	-	-	-	-	-	-	-	-	-	-	-	-	-	1.2396	0.0321372	0.273055	-1.87274	down
C12H16N2O3	L-Alanyl-L-Phenylalanine	Amino acids and derivatives	Amino acids and derivatives	3061-90-3	3	224066	397764	256991	100838	76765.6	100122	102106	127594	260245	163436	164463	191208	-	-	-	-	-	-	-	-	-	-	-	-	-	-	-	-	-	1.19729	0.0610387	0.31602	-1.66191	down
C22H22N4O6	His-HoPhe-OH	Amino acids and derivatives	Amino acids and derivatives	-	3	469562	465334	591015	1.00498e+06	905130	953103	898544	1.13183e+06	1.04617e+06	758115	689078	643892	-	-	-	-	-	-	-	-	-	-	-	-	1.25468	0.00556033	2.0162	1.01164	up	-	-	-	-	-
C17H20O9	3-O-Feruloylquinic acid	Phenolic acids	Phenolic acids	1899-29-2	2	83220.4	36980.5	94810.3	238913	268573	283106	203594	175742	154383	83365	52616.5	89274.2	C02572	-	1.19629	0.00560846	0.422049	-1.24452	down	-	-	-	-	-	1.11535	0.0104887	2.48228	1.31167	up	1.15902	0.00136861	3.67698	1.87852	up
C16H32N6O4S1	Met-Arg-Val	Amino acids and derivatives	Amino acids and derivatives	-	3	1.15172e+06	300088	839088	1.23115e+06	1.07793e+06	964240	682266	699141	468136	185554	157492	188893	-	-	1.26359	0.0257418	0.287605	-1.79784	down	-	-	-	-	-	-	-	-	-	-	-	-	-	-	-
C9H11N5O3	L-Sepiapterin	Nucleotides and derivatives	Nucleotides and derivatives	17094-01-8	3	22297.6	25658.1	25486.6	86394.9	74156.8	77277.1	70845.1	71760.5	62499.5	37806.6	31792	46484.8	C00835	ko00790,ko01100	-	-	-	-	-	-	-	-	-	-	1.29911	0.00181063	2.79274	1.48168	up	1.26226	0.0024337	3.23831	1.69524	up
C21H40O4	1-Oleoyl-Sn-Glycerol	Lipids	Glycerol ester	129784-87-8	3	629376	534336	694395	484106	488934	451146	188627	194719	173154	158763	230718	221477	-	-	-	-	-	-	-	1.21922	0.000188407	0.39075	-1.35568	down	1.29646	0.0101889	0.299499	-1.73938	down	-	-	-	-	-
C14H16O8	1-O-Caffeoyl-β-D-xylose	Phenolic acids	Phenolic acids	-	3	5253.75	3002.62	1555.28	88380.6	138457	72415.1	34725.2	33694.5	26445.6	20803.4	33606.5	7443.51	-	-	-	-	-	-	-	1.14687	0.0733292	0.317008	-1.65741	down	1.25511	0.00342028	9.66865	3.27331	up	1.24042	0.0396349	30.4997	4.93072	up
C18H35NO	Octadec-8-enamide	Lipids	Free fatty acids	-	1	976132	852852	560406	516985	421237	387175	496792	435378	510755	2.09054e+06	2.0317e+06	2.19405e+06	-	-	1.29338	9.69091e-05	4.37742	2.13008	up	-	-	-	-	-	-	-	-	-	-	-	-	-	-	-
C19H24O2	(3S,5R)-3,5-Dihydroxy-1,7-diphenyl-heptane	Others	Others	-	2	4.40423e+06	3.20234e+06	3.67263e+06	7.74503e+06	8.8425e+06	7.82974e+06	5.86904e+06	5.80211e+06	5.95988e+06	3.7514e+06	5.42346e+06	4.80924e+06	-	-	-	-	-	-	-	-	-	-	-	-	-	-	-	-	-	1.22781	0.000912402	2.1648	1.11424	up
C12H15NO7	N-(beta-D-Glucosyl)nicotinate	Others	Vitamin	-	3	6.47922e+06	3.9329e+06	2.99183e+06	9.54012e+06	1.00733e+07	9.73723e+06	2.2278e+06	2.26399e+06	2.1017e+06	6.49461e+06	6.5525e+06	7.31691e+06	-	-	1.29278	0.00254536	3.0885	1.62691	up	1.2232	0.000134301	0.224646	-2.15427	down	1.07245	0.160854	0.491907	-1.02354	down	1.12078	0.0338826	2.1897	1.13073	up
C31H34O16	1-O-rhamnose-3,4-Di-O-Caffeoyl Quinic Acid	Phenolic acids	Phenolic acids	-	2	411178	612964	389206	188024	194896	202555	210385	215010	249882	499568	488068	496147	-	-	1.28469	0.00114164	2.19729	1.13573	up	-	-	-	-	-	1.20796	0.0704218	0.477786	-1.06556	down	1.19912	0.0601158	0.414247	-1.27144	down
C25H35N9O7	His-Phe-Arg-Asp	Amino acids and derivatives	Amino acids and derivatives	-	3	307480	227328	813682	1.02174e+06	1.09791e+06	925108	1.28693e+06	1.08912e+06	1.03015e+06	613801	710440	706127	-	-	-	-	-	-	-	-	-	-	-	-	1.06068	0.048543	2.52594	1.33682	up	-	-	-	-	-
C11H12N2O3	5-Hydroxy-DL-tryptophan(5-HTP)	Amino acids and derivatives	Amino acids and derivatives	56-69-9	1	2.08431e+06	4.58231e+06	2502891	7.00444e+06	7.01563e+06	7.08559e+06	2.84909e+06	2.88473e+06	2.76635e+06	3.49819e+06	3.3495e+06	3.58975e+06	C01017	-	-	-	-	-	-	1.2235	2.35709e-07	0.402744	-1.31207	down	-	-	-	-	-	1.12552	0.0355595	2.30172	1.20271	up
C11H14NO6+	Nicotinate D-ribonucleoside	Others	Vitamin	17720-18-2	3	4.67885e+06	5.70649e+06	5.37385e+06	1.61562e+06	1.61387e+06	1.55372e+06	1.06403e+06	1.13228e+06	1.28567e+06	1.79995e+06	1.87973e+06	1.95927e+06	C05841	ko00760,ko01100	-	-	-	-	-	-	-	-	-	-	1.30326	0.00397505	0.220948	-2.17822	down	1.26331	0.00658446	0.303518	-1.72015	down
C17H14O6	Cirsimaritin (4',5-dihydroxy-6,7-dimethoxyflavone)	Flavonoids	Flavones	6601-62-3	3	81895.8	11363.4	41135.4	109143	106251	115235	39996	48044.9	34387.4	57154.8	75821.6	68821.3	C17785	-	-	-	-	-	-	1.20146	0.000301023	0.370289	-1.43328	down	-	-	-	-	-	-	-	-	-	-
C16H18O9	Chlorogenic acid (3-O-Caffeoylquinic acid)*	Phenolic acids	Phenolic acids	327-97-9	1	1.31879e+07	7.67752e+06	9.50328e+06	4.07551e+07	4.03436e+07	3.75778e+07	1.31162e+07	1.35289e+07	1.24524e+07	1.45557e+07	1.54978e+07	1.43107e+07	C00852	ko00940,ko00941,ko00945,ko01110	-	-	-	-	-	1.22167	0.000577553	0.329446	-1.60189	down	-	-	-	-	-	1.23699	0.000325838	3.90786	1.96638	up
C15H21N5O8	His-Asp-Glu	Amino acids and derivatives	Amino acids and derivatives	-	3	4.27099e+06	4.5727e+06	4.90443e+06	1.11442e+07	1.10306e+07	1.09804e+07	1.02506e+07	1.0019e+07	9.73705e+06	7.11255e+06	6.63813e+06	6.38353e+06	-	-	-	-	-	-	-	-	-	-	-	-	1.30138	2.96185e-05	2.1826	1.12605	up	1.26365	0.000386861	2.41161	1.27	up
C10H12N4O5	9-(Arabinosyl)hypoxanthine	Nucleotides and derivatives	Nucleotides and derivatives	7013-16-3	3	661200	774673	677590	160416	159176	157142	81146.8	168368	8464.2	487826	522186	607045	-	-	1.03645	0.00191688	6.26817	2.64804	up	-	-	-	-	-	1.08439	0.000623209	0.122065	-3.03428	down	1.26636	0.00416381	0.22557	-2.14835	down
C24H44NO9P	PS(18:2)	Lipids	Glycerol ester	-	3	234952	223940	261489	100566	43863.1	46137.9	81760.8	27611.7	53783.1	113602	22706.3	44163.8	-	-	-	-	-	-	-	-	-	-	-	-	1.21206	0.00103358	0.226485	-2.14251	down	1.18438	0.00274618	0.264537	-1.91846	down
C25H24N2O7	Tyr-HoPhe-OH	Amino acids and derivatives	Amino acids and derivatives	-	3	168130	68166.7	114352	794391	887528	766631	894427	1.00626e+06	1.06229e+06	887684	913561	1.06216e+06	-	-	-	-	-	-	-	-	-	-	-	-	1.27457	0.000408522	8.44999	3.07895	up	1.22603	0.00016081	6.98291	2.80383	up
C6H14O6	D-Sorbitol	Others	Saccharides	50-70-4	1	204580	280425	353782	1.1458e+06	1.07374e+06	1.16467e+06	992231	1.03649e+06	1.11014e+06	1.16285e+06	1.07722e+06	987331	C00794	ko00051,ko00052,ko01100,ko02010	-	-	-	-	-	-	-	-	-	-	1.27107	0.000208154	3.74214	1.90387	up	1.23624	0.000221221	4.03465	2.01244	up
C10H22O2	1,10-Decanediol	Others	Alcohol compounds	112-47-0	3	9	9	9	130814	14948.1	124074	175444	204622	169437	81765.8	92270.2	37423.5	-	-	1.12924	0.00770229	0.38482	-1.37774	down	-	-	-	-	-	1.30952	0.00350132	20351.9	14.3129	up	1.25377	0.138898	9993.93	13.2868	up
C11H13NO3	Cantleyine	Alkaloids	Alkaloids	30333-81-4	3	202268	235954	247046	609372	631957	682839	398524	335943	356284	310305	334170	320330	C09933	-	-	-	-	-	-	-	-	-	-	-	-	-	-	-	-	1.25777	0.000275597	2.80791	1.4895	up
C11H12O5	Sinapic acid	Phenolic acids	Phenolic acids	530-59-6	3	109700	69874.4	89674.5	77664.2	77628.6	50109.7	385419	384302	384060	177267	158610	190040	C00482	ko00940,ko01100,ko01110	1.28536	0.00186064	0.45582	-1.13346	down	1.20697	0.000823754	5.61717	2.48984	up	1.29113	0.00149825	4.28518	2.09936	up	-	-	-	-	-
C11H14O4	Sinapyl alcohol	Phenolic acids	Phenolic acids	537-33-7	3	66416.9	41797.8	44420	127156	123636	107190	77703.7	98264.5	108107	32984.2	39466.3	34093.4	C02325	ko00940,ko01100,ko01110	1.26374	0.0182094	0.375056	-1.41482	down	-	-	-	-	-	-	-	-	-	-	1.19756	0.00282547	2.34535	1.2298	up
C22H34O5	Negundoin A	Terpenoids	Ditepenoids	-	3	6.44995e+06	4.708e+06	7.90009e+06	9.0998e+06	8.85722e+06	9.699e+06	2.4187e+06	2.75371e+06	2.52346e+06	7.6197e+06	7.16572e+06	7.36482e+06	-	-	1.29286	1.56058e-05	2.8782	1.52517	up	1.22056	0.000361025	0.278271	-1.84544	down	1.2352	0.0530437	0.403812	-1.30824	down	-	-	-	-	-
C19H25N5O5S1	Trp-Cys-Gln	Amino acids and derivatives	Amino acids and derivatives	-	3	2.05557e+06	1.56534e+06	1.38614e+06	5.65253e+06	5.53694e+06	5.49805e+06	2.23092e+06	2.80218e+06	2.29454e+06	2.83073e+06	2.84302e+06	3.22378e+06	-	-	-	-	-	-	-	1.20597	0.00203548	0.439109	-1.18735	down	-	-	-	-	-	1.24892	0.00170677	3.3328	1.73673	up
C14H20O8	Vanilloloside	Phenolic acids	Phenolic acids	74950-96-2	2	5.03475e+07	5.42708e+07	3.85596e+07	4.00205e+07	4.14209e+07	4.40502e+07	3.22372e+07	1.8341e+07	1.85002e+07	3.01374e+07	2.91046e+07	3.16008e+07	-	-	-	-	-	-	-	-	-	-	-	-	1.13716	0.0200572	0.482465	-1.0515	down	-	-	-	-	-
C9H18N2O4	Ser-Leu	Amino acids and derivatives	Amino acids and derivatives	6665-16-3	3	3.57958e+07	5.51749e+07	2.99604e+07	2.38735e+07	2.19346e+07	2.09099e+07	1.1806e+07	1.7097e+07	1.44624e+07	3.78073e+07	3.53166e+07	3.66729e+07	-	-	1.26354	0.00124139	2.53189	1.34022	up	-	-	-	-	-	1.20998	0.0717049	0.358596	-1.47957	down	-	-	-	-	-
C17H22O10	10-Dehydrogeniposide	Terpenoids	Sesquiterpenoids	-	3	171072	190992	138878	127621	164524	141793	278016	318500	250206	113606	141444	136803	-	-	1.2574	0.00805716	0.462789	-1.11157	down	-	-	-	-	-	-	-	-	-	-	-	-	-	-	-
C11H20N2O5	L-γ-Glutamyl-L-leucine	Amino acids and derivatives	Amino acids and derivatives	2566-39-4	2	637400	678877	350350	550763	618072	661777	265472	300967	269736	298305	243703	245878	-	-	-	-	-	-	-	1.20668	0.00497908	0.456774	-1.13045	down	-	-	-	-	-	-	-	-	-	-
C21H38O4	1-Linoleoylglycerol*	Lipids	Glycerol ester	2277-28-3	1	2.31814e+06	1.64789e+06	1.34174e+06	280245	307948	297140	233395	305962	282962	385208	396911	411649	-	-	-	-	-	-	-	-	-	-	-	-	1.28488	0.0346103	0.154927	-2.69034	down	1.24742	0.0360992	0.166799	-2.58382	down
C20H20O12	4-Hydroxybenzoyl-1-O-(6''-O-galloyl)glucoside	Phenolic acids	Phenolic acids	-	3	115392	580814	89154.2	3240.05	3686.06	5683.48	24832.4	16220.9	17267	14076.5	5930.94	17774.2	-	-	-	-	-	-	-	1.17802	0.0236093	4.62507	2.20948	up	1.15717	0.268399	0.0742593	-3.75128	down	1.20469	0.24808	0.0160558	-5.96076	down
C38H48O17	Buddlenol F glucoside	Lignans and Coumarins	Lignans	-	3	2.24866e+06	1.31531e+06	2.35595e+06	7.11917e+06	6.84608e+06	6.82593e+06	2.7768e+06	2.56326e+06	2.59937e+06	4.31053e+06	4.02361e+06	4.1557e+06	-	-	-	-	-	-	-	1.2219	9.34745e-06	0.381865	-1.38887	down	-	-	-	-	-	1.21542	0.00251089	3.51208	1.81232	up
C18H24O12	4-Hydroxybenzoic acid glucosyl xyloside	Phenolic acids	Phenolic acids	-	1	149024	287258	133638	5.63168e+06	5.88359e+06	5.96811e+06	4.04495e+06	4.16628e+06	4.34229e+06	3.48551e+06	3.42083e+06	3.42594e+06	-	-	-	-	-	-	-	-	-	-	-	-	1.29383	2.15137e-05	22.0268	4.46119	up	1.26012	2.44957e-05	30.6769	4.93908	up
C22H26O12	5-O-p-Coumaroylshikimic acid O-glucoside	Phenolic acids	Phenolic acids	-	3	61813.7	94162	43817.2	264392	256732	105394	168844	172274	204314	184150	170872	194005	-	-	-	-	-	-	-	-	-	-	-	-	1.19866	0.00424058	2.72999	1.4489	up	1.05989	0.101367	3.13584	1.64885	up
C28H28O7	Bletilols B	Others	Others	-	3	1.09559e+07	1.40721e+07	1.20202e+07	1.48185e+07	1.30591e+07	1.29325e+07	4.77472e+06	4.68307e+06	4.4745e+06	1.21515e+07	1.16021e+07	1.23556e+07	-	-	1.29483	0.000209244	2.59177	1.37394	up	1.21922	0.00394135	0.341393	-1.55049	down	1.29524	0.0131611	0.376059	-1.41097	down	-	-	-	-	-
C19H36O10	Octyl 6-O-Alpha-L-Arabinopyranosyl-Beta-D-Glucopyranoside	Others	Others	168288-07-1	2	6.52322e+06	1.47439e+07	8.77051e+06	1.19837e+06	1.13312e+06	1.14889e+06	1.36401e+06	1.34237e+06	1.33873e+06	1.69105e+06	1.55952e+06	1.87595e+06	-	-	-	-	-	-	-	-	-	-	-	-	1.27408	0.0716478	0.134669	-2.89252	down	1.23638	0.0689297	0.115867	-3.10946	down
C25H30N4O5S1	Trp-Tyr-Met	Amino acids and derivatives	Amino acids and derivatives	-	3	2.01499e+07	1.11907e+07	1.57774e+07	3.31564e+06	2.93014e+06	3.32923e+06	1.02719e+06	1.12849e+06	1.10496e+06	1.13484e+06	1.26653e+06	1.04096e+06	-	-	-	-	-	-	-	1.21819	0.00257675	0.340537	-1.55412	down	1.29754	0.0298918	0.0692017	-3.85305	down	1.24072	0.0398557	0.203213	-2.29893	down
C18H28O9	5'-Glucosyloxyjasmanic acid	Phenolic acids	Phenolic acids	-	1	398467	1.04156e+06	541143	1.96084e+06	1.94995e+06	2.00014e+06	722030	856666	852903	350026	370921	372130	-	-	1.28262	0.00837267	0.44953	-1.15351	down	1.21338	0.000507271	0.411374	-1.28148	down	-	-	-	-	-	1.14785	0.0209094	2.98355	1.57703	up
C9H17NO5	D-Pantothenic Acid	Others	Vitamin	79-83-4	1	3.22341e+07	5.37206e+07	6.76e+07	3.54682e+07	3.85065e+07	37212189	2.25206e+07	2.2593e+07	2.20409e+07	2.37679e+07	2.45469e+07	2.32104e+07	C00864	ko00410,ko00770,ko01100,ko01110,ko01240	-	-	-	-	-	-	-	-	-	-	1.14667	0.107385	0.437333	-1.1932	down	-	-	-	-	-
C22H30O14	6'-O-Feruloyl-D-sucrose	Phenolic acids	Phenolic acids	118230-77-6	3	348765	43721.1	118049	505381	567206	525516	134097	150954	151085	177171	234008	230084	-	-	-	-	-	-	-	1.2196	0.00100352	0.272909	-1.87351	down	-	-	-	-	-	-	-	-	-	-
C33H42N10O8	His-Trp-Asp-His-Leu	Amino acids and derivatives	Amino acids and derivatives	-	3	279706	218949	225369	1.7635e+06	2.38053e+06	2.39023e+06	2.27994e+06	1.9354e+06	1.87897e+06	1.55001e+06	1.30039e+06	1.47642e+06	-	-	-	-	-	-	-	-	-	-	-	-	1.30519	0.00412608	8.41727	3.07335	up	1.2615	0.010753	9.02491	3.17391	up
C18H35NO	Oleamide (9-Octadecenamide)	Lipids	Free fatty acids	301-02-0	1	186679	153176	97802	96714.2	78062.3	69442.3	97370.5	84333	97538.2	390641	394993	387801	C19670	-	1.29389	1.44615e-05	4.20222	2.07115	up	-	-	-	-	-	-	-	-	-	-	-	-	-	-	-
C30H48O5	2,3,23-Trihydroxyolean-12-en-28-oic acid	Terpenoids	Triterpene	-	2	772577	2.0112e+06	1.67179e+06	1.00421e+07	7.72631e+06	7.24622e+06	2.28355e+06	3.37259e+06	2.49632e+06	2.65744e+06	3.12461e+06	1.6713e+06	-	-	-	-	-	-	-	1.18037	0.0135917	0.325907	-1.61747	down	-	-	-	-	-	1.20047	0.00742633	5.61425	2.48909	up
C16H24O10	Cornusoside A	Others	Others	-	3	179875	540563	218967	2.22742e+06	2.26545e+06	2.1498e+06	1.13056e+06	1.35221e+06	1.31905e+06	1.92725e+06	1.88227e+06	1.97531e+06	-	-	-	-	-	-	-	-	-	-	-	-	1.18953	0.00413246	4.04705	2.01687	up	1.21077	0.00188764	7.07114	2.82194	up
C6H11NO3	N-Methyl-Trans-4-Hydroxy-L-Proline	Amino acids and derivatives	Amino acids and derivatives	4252-82-8	3	1.16545e+06	1.14275e+06	1.10633e+06	2.79217e+06	2.72851e+06	2.47618e+06	1.82039e+06	1.74308e+06	1.70439e+06	1.7966e+06	1.66842e+06	1.67096e+06	-	-	-	-	-	-	-	-	-	-	-	-	-	-	-	-	-	1.26507	0.00314056	2.34201	1.22775	up
C21H18O12	Kaempferol-7-O-glucuronide	Flavonoids	Flavonols	-	3	30323.8	20340.8	27218	106804	94200.6	107319	109583	137399	119711	24748.6	44330.3	11756.5	-	-	1.17226	0.00172948	0.220444	-2.18151	down	-	-	-	-	-	1.29092	0.0033137	4.70827	2.2352	up	1.24768	0.000260813	3.95881	1.98507	up
C16H16O6	Hesperetin dihydrochalcone	Others	Ketone compounds	35400-60-3	3	180311	145486	166781	1.60916e+06	1.67253e+06	1.6883e+06	766985	837661	766419	1.14562e+06	1.16139e+06	1.30107e+06	-	-	-	-	-	-	-	1.21923	1.38684e-05	0.477076	-1.06771	down	1.30517	0.000297587	4.81358	2.26711	up	1.26752	3.27475e-05	10.0898	3.33482	up
C17H20O9	Amurenlaetone A	Phenolic acids	Phenolic acids	-	3	671966	426325	1.16649e+06	3.76837e+06	4.81539e+06	4.1972e+06	1.76653e+06	2.37402e+06	2.42982e+06	2.00231e+06	1.73729e+06	1.35872e+06	-	-	-	-	-	-	-	-	-	-	-	-	1.15122	0.00919098	2.9011	1.5366	up	1.20005	0.00113942	5.64335	2.49655	up
C6H10O6	D-Glucono-1,5-lactone	Others	Saccharides	90-80-2	3	122921	69309.6	89273.9	135153	123948	136017	83655.4	91441.9	91874.2	211155	216792	198524	C00198	ko00030,ko01100,ko01110,ko01200	1.29118	0.000326584	2.34658	1.23056	up	-	-	-	-	-	-	-	-	-	-	-	-	-	-	-
C19H30N6O8	His-Ser-Val-Glu	Amino acids and derivatives	Amino acids and derivatives	-	3	151549	35105.7	59022	1.86938e+06	1.96242e+06	1.95196e+06	549541	526140	494701	234302	213894	222583	-	-	1.29094	0.000990817	0.427144	-1.22721	down	1.22248	2.40699e-05	0.271516	-1.88089	down	1.21107	0.00210103	6.39207	2.67628	up	1.22956	3.29813e-06	23.5421	4.55717	up
C19H28N4O5	Leu-Phe-Asn	Amino acids and derivatives	Amino acids and derivatives	-	3	1.48899e+06	1.22469e+06	1.79804e+06	500087	562673	536938	583749	557923	620371	503949	554098	589128	-	-	-	-	-	-	-	-	-	-	-	-	1.27077	0.0299025	0.390547	-1.35643	down	1.24249	0.0267251	0.354564	-1.49588	down
C7H13NO4S	S-(2-Carboxypropyl)cysteine	Amino acids and derivatives	Amino acids and derivatives	6852-42-2	3	355440	314084	319575	69683.5	81550.5	107188	85084.5	89838.1	84847.9	113627	14888.1	148855	-	-	-	-	-	-	-	-	-	-	-	-	1.30645	0.00249568	0.262633	-1.92888	down	1.247	0.000162685	0.26127	-1.93639	down
C12H17N5O6	Gly-Asp-His	Amino acids and derivatives	Amino acids and derivatives	-	3	9.94812e+06	1.04342e+07	1.26262e+07	6.37609e+06	6.79438e+06	6.68663e+06	4.87265e+06	4.48317e+06	4.84788e+06	7.55857e+06	7.12372e+06	7.22478e+06	-	-	-	-	-	-	-	-	-	-	-	-	1.28834	0.0151377	0.430304	-1.21657	down	-	-	-	-	-
C15H16O8	Skimmin (7-Hydroxycoumarin-7-O-glucoside)	Lignans and Coumarins	Coumarins	93-39-0	2	7.89001e+06	1.00481e+07	7.47096e+06	1.12024e+07	9.66017e+06	1.25357e+07	4.42869e+06	4.81998e+06	4.36334e+06	7.93232e+06	7.93427e+06	8.77454e+06	-	-	-	-	-	-	-	1.20406	0.0135045	0.407566	-1.2949	down	-	-	-	-	-	-	-	-	-	-
C14H18N2O6	2-((L-tyrosyl)oxy)-5-amino-5-oxopentanoic acid	Amino acids and derivatives	Amino acids and derivatives	-	1	1.30194e+06	1.38386e+06	348271	6.08029e+06	6.59901e+06	6.85376e+06	544157	500763	576989	779537	638094	772363	-	-	-	-	-	-	-	1.22244	0.00132674	0.0830341	-3.59015	down	-	-	-	-	-	1.16714	0.000346947	6.4379	2.68659	up
C2H7NO3S	2-Aminoethanesulfonic acid	Organic acids	Organic acids	107-35-7	3	253811	155307	181834	362951	403747	368747	167950	140657	130178	318289	358141	348625	C00245	ko00430,ko00920,ko01100,ko02010	1.27256	0.000295594	2.33613	1.22412	up	1.20704	0.000182721	0.386443	-1.37167	down	-	-	-	-	-	-	-	-	-	-
C11H14N2O4	Gly-Tyr	Amino acids and derivatives	Amino acids and derivatives	658-79-7	3	249901	380869	270490	139257	127892	128721	203940	203065	226303	282784	252766	270334	-	-	-	-	-	-	-	-	-	-	-	-	-	-	-	-	-	1.20322	0.0525523	0.439242	-1.18691	down
C27H41N9O11	Thr-Tyr-Asp-Arg-Asn	Amino acids and derivatives	Amino acids and derivatives	-	3	395828	188996	291008	4.64443e+06	4.70429e+06	4.36621e+06	1.23798e+06	1.48772e+06	1.33702e+06	816367	525233	710354	-	-	-	-	-	-	-	1.21828	3.66981e-05	0.296226	-1.75523	down	1.26305	0.00042619	4.63869	2.21372	up	1.25403	2.96447e-05	15.6593	3.96895	up
C10H12O5	2,3-Dihydroxy-1-(4'-hydroxy-3'-methoxyphenyl)-propan-1-one	Others	Others	-	1	137426	140116	102609	274658	259704	253347	184097	188534	157817	238870	245290	237808	-	-	-	-	-	-	-	-	-	-	-	-	-	-	-	-	-	1.22743	0.00209633	2.07209	1.05109	up
C14H21NO8	Hydroxymenisdaurin D	Alkaloids	Alkaloids	-	3	736524	949502	738787	1.80384e+06	2.16845e+06	2.13506e+06	1.15213e+06	1.12642e+06	1.1803e+06	1.16495e+06	1.08655e+06	979266	-	-	-	-	-	-	-	-	-	-	-	-	-	-	-	-	-	1.24202	0.00196084	2.51869	1.33267	up
C15H22N2O3	Phe-Ile	Amino acids and derivatives	Amino acids and derivatives	22951-94-6	3	152618	114320	94958.6	1.81117e+06	1.99424e+06	2.28152e+06	875126	992045	954834	970838	954363	1.10296e+06	-	-	-	-	-	-	-	1.19975	0.0115808	0.463617	-1.10899	down	1.29819	0.000272264	7.79784	2.96307	up	1.2635	0.0045935	16.8196	4.07207	up
C14H22N6O5S1	Gln-Cys-His	Amino acids and derivatives	Amino acids and derivatives	-	3	1.90952e+06	1.7194e+06	1.59874e+06	854968	1.04493e+06	885939	3.73887e+06	2.95852e+06	3.36664e+06	1.16381e+06	1.40825e+06	1.29429e+06	-	-	1.27597	0.00720631	0.384175	-1.38017	down	1.2114	0.00578613	3.61257	1.85302	up	-	-	-	-	-	-	-	-	-	-
C9H11NO3	DL-O-tyrosine	Amino acids and derivatives	Amino acids and derivatives	2370-61-8	1	18703.1	22321.1	29608.6	109954	144859	154775	18842.6	27215.6	33133.1	49419.6	53730.3	49431	-	-	-	-	-	-	-	1.18978	0.00980856	0.193344	-2.37076	down	-	-	-	-	-	1.24477	0.0108777	5.79884	2.53576	up
C6H13NO2	6-Deoxyfagomine	Alkaloids	Piperidine alkaloids	197449-09-5	1	2.54248e+06	2.30487e+06	2.13172e+06	4.87165e+06	5.28363e+06	5.6366e+06	2.79655e+06	2.80365e+06	2.60603e+06	2.63396e+06	2.83508e+06	2.94289e+06	-	-	-	-	-	-	-	-	-	-	-	-	-	-	-	-	-	1.2548	0.00120162	2.26275	1.17807	up
C18H30O3	9-Oxo-10E,12Z-octadecadienoic acid	Lipids	Free fatty acids	54232-59-6	3	24454	25012.1	35480.5	61145.8	64311.6	55887.9	15869.5	13111.7	19219	42078	54202.2	48392.9	C14766	ko00591	1.26088	0.0040072	3.00151	1.58569	up	1.20418	0.000230566	0.265792	-1.91163	down	-	-	-	-	-	1.20113	0.00284822	2.13482	1.09411	up
C9H18N2O3	Ile-Ala	Amino acids and derivatives	Amino acids and derivatives	24787-73-3	3	3.83961e+07	4.94164e+07	3.79181e+07	5.206e+07	4.75082e+07	5.25196e+07	2.34736e+07	2.58433e+07	2.40157e+07	4.3482e+07	4.1276e+07	4.5602e+07	-	-	-	-	-	-	-	1.21534	0.000980253	0.482174	-1.05238	down	-	-	-	-	-	-	-	-	-	-
C12H22O11	Lactobiose	Others	Saccharides	63-42-3	1	1.26924e+06	552021	945264	1.05529e+06	1.33747e+06	1.26595e+06	602838	566224	616357	894875	957153	875517	C00243	ko00052,ko01100,ko02010	-	-	-	-	-	1.19663	0.0156042	0.487991	-1.03507	down	-	-	-	-	-	-	-	-	-	-
C8H14O8	Mucic acid Dimethyl Ester	Phenolic acids	Phenolic acids	-	2	3.88753e+06	2.81566e+06	2.54488e+06	1.77549e+07	1.72369e+07	1.89933e+07	5.06956e+06	5.00475e+06	5.02672e+06	9.86088e+06	9.69915e+06	9.10678e+06	-	-	-	-	-	-	-	1.22253	0.0015924	0.279726	-1.83791	down	-	-	-	-	-	1.25749	3.55956e-05	5.83743	2.54533	up
C16H32N6O4S1	Val-Arg-Met	Amino acids and derivatives	Amino acids and derivatives	-	3	3.36404e+06	2.01369e+07	8.22075e+06	1.16309e+06	1.24021e+06	1.37447e+06	3.92847e+06	4.18766e+06	4.38695e+06	1.66912e+06	1.65106e+06	1.25982e+06	-	-	1.27331	0.000149871	0.36631	-1.44886	down	1.21845	0.000400793	3.30964	1.72667	up	-	-	-	-	-	1.10911	0.202488	0.119091	-3.06986	down
C22H28O14	4-O-(4'-O-alpha-D-Glucopyranosyl)caffeoylquinic acid	Phenolic acids	Phenolic acids	1401352-62-2	2	672556	1.02375e+06	1.47416e+06	288170	319318	301114	27353	26698.9	36160.7	10949.9	19259	9149.56	-	-	1.13169	0.0177218	0.436285	-1.19666	down	1.21846	0.000372308	0.0992872	-3.33225	down	1.29806	0.0474267	0.028454	-5.13522	down	1.19087	0.0828337	0.286583	-1.80298	down
C14H20O9	2,6-Dimethoxy-4-hydroxyphenol-1-O-ß-D-glucopyranoside	Others	Others	-	1	17127.7	42230.6	27430.3	210104	248346	235417	102756	127759	98574.4	208516	242549	228237	-	-	1.2576	0.000991856	2.06419	1.04557	up	1.18775	0.0013116	0.474283	-1.07618	down	1.21594	0.00271484	3.79185	1.9229	up	1.2339	0.00029276	7.9949	2.99908	up
C20H26N2O2	Hydroquinine	Alkaloids	Quinoline alkaloids	522-66-7	2	4.1514e+06	3.74984e+06	3.13606e+06	1.79935e+06	1.74987e+06	1.87835e+06	6.02683e+06	6.08358e+06	6.97962e+06	3.1832e+06	2.92709e+06	3.37905e+06	-	-	1.27613	0.00373216	0.497084	-1.00844	down	1.22028	0.00410591	3.51723	1.81444	up	-	-	-	-	-	1.23168	0.0225727	0.491748	-1.02401	down
C17H20O9	Murrayacarpin A glucoside	Lignans and Coumarins	Coumarins	-	1	653475	328779	1.06918e+06	3.27755e+06	4.89302e+06	4.96901e+06	1.42221e+06	1.75762e+06	2.35044e+06	1.87273e+06	2.04593e+06	1.70771e+06	-	-	-	-	-	-	-	1.11	0.02729	0.420886	-1.2485	down	1.07937	0.0308344	2.6958	1.43071	up	1.18214	0.0126032	6.40506	2.67921	up
C17H23N3O7S1	Glu-Cys-Tyr	Amino acids and derivatives	Amino acids and derivatives	-	3	6.92801e+06	18118590	6.77665e+06	2.54579e+07	2.65448e+07	2.92982e+07	1.94933e+07	1.77799e+07	1.99815e+07	3.26227e+07	3.17703e+07	3.2576e+07	-	-	-	-	-	-	-	-	-	-	-	-	-	-	-	-	-	1.08491	0.038663	2.55476	1.35319	up
C14H20O8	5-(2-Hydroxyethyl)-2-O-glucosylphenol	Phenolic acids	Phenolic acids	-	3	1.59108e+06	2.11789e+06	2.78357e+06	388584	349145	342214	9	375215	355241	188797	185856	187212	-	-	-	-	-	-	-	-	-	-	-	-	-	-	-	-	-	1.25017	0.0344795	0.166336	-2.58783	down
C8H16N2O3	N6-Acetyl-L-lysine	Amino acids and derivatives	Amino acids and derivatives	692-04-6	3	3.32839e+06	3.38694e+06	5.15424e+06	1.20264e+07	1.2623e+07	1.13093e+07	2.16941e+06	4.46236e+06	2.23487e+06	4.21797e+06	4.98386e+06	4.20733e+06	C02727	ko00310,ko01100	-	-	-	-	-	1.16438	0.00186776	0.246578	-2.01988	down	-	-	-	-	-	1.22511	0.000830946	3.02949	1.59907	up
C23H22N2O6	Val-Nap-OH	Amino acids and derivatives	Amino acids and derivatives	-	3	20005	182718	93315.5	412632	411984	368994	612016	521572	542542	384854	294834	308150	-	-	-	-	-	-	-	-	-	-	-	-	1.10198	0.00267003	5.66186	2.50128	up	1.01482	0.0169773	4.03194	2.01147	up
C19H24N4O4	Pro-Trp-Ala	Amino acids and derivatives	Amino acids and derivatives	-	3	136974	129597	54896.2	261866	161328	218653	591355	474228	546176	308000	334470	372130	-	-	-	-	-	-	-	1.16163	0.0021524	2.51112	1.32833	up	1.23394	0.000770897	5.01375	2.32589	up	-	-	-	-	-
C33H44N2O3	Dendrocrepine	Alkaloids	Alkaloids	51020-39-4	1	6.96856e+06	5.52883e+06	4.59101e+06	4.35917e+06	3.57494e+06	3.72352e+06	2.55637e+06	2.68671e+06	2.54093e+06	5.23892e+06	4.54189e+06	5.24766e+06	-	-	-	-	-	-	-	-	-	-	-	-	1.24657	0.0457118	0.455514	-1.13443	down	-	-	-	-	-
C6H13NO2	6-Aminocaproic acid	Organic acids	Organic acids	60-32-2	3	1.19184e+07	1.0162e+07	1.02266e+07	2.40908e+07	2.36148e+07	2.4463e+07	1.30788e+07	1.19982e+07	1.1628e+07	1.16763e+07	1.26207e+07	1.34861e+07	C02378	ko01100	-	-	-	-	-	-	-	-	-	-	-	-	-	-	-	1.25947	0.000433654	2.23384	1.15953	up
C21H22O11	Eriodictyol-7-O-glucoside	Flavonoids	Flavanones	38965-51-4	3	271075	133331	202510	174069	227295	184414	57094.6	71064.3	79890.4	52962.3	240868	75317.3	-	-	-	-	-	-	-	1.18728	0.0084214	0.355168	-1.49343	down	1.19677	0.0752057	0.342798	-1.54457	down	-	-	-	-	-
C6H5NO2	Nicotinic acid (Vitamin B3)	Others	Vitamin	59-67-6	2	3.06892e+06	3.34153e+06	1.8092e+06	1.01994e+07	1.12388e+07	1.20915e+07	7.62729e+06	9.81435e+06	1.13563e+07	1.32626e+07	1.31395e+07	1.43844e+07	C00253	ko00760,ko00960,ko01100,ko01110,ko01240	-	-	-	-	-	-	-	-	-	-	1.23487	0.0130408	3.50355	1.80882	up	1.22876	0.00034622	4.07921	2.02829	up
C17H20O6	Guaiacylglycerol-β-Guaiacyl Ether	Lignans and Coumarins	Lignans	7382-59-4	2	35994	44926.5	29362.8	320203	316733	302816	117876	132741	139243	97007.4	97718.3	118028	-	-	-	-	-	-	-	1.21454	3.08561e-05	0.414855	-1.26932	down	1.2814	0.000483247	3.53508	1.82174	up	1.26368	3.15312e-06	8.52126	3.09107	up
C22H24O11	Hesperetin-7-O-glucoside	Flavonoids	Flavanones	31712-49-9	3	283878	177237	171706	640233	628315	560610	339974	341967	363301	441109	271098	167898	C16422	ko00941	-	-	-	-	-	-	-	-	-	-	-	-	-	-	-	1.21497	0.00147121	2.89048	1.53131	up
C8H8O4	3-Hydroxymandelate	Organic acids	Organic acids	17119-15-2	1	796924	590314	461909	474972	469578	573204	37931.9	251038	221320	338934	232541	413870	-	-	-	-	-	-	-	-	-	-	-	-	1.01743	0.0243906	0.27596	-1.85747	down	-	-	-	-	-
C26H30O9	Isobavachalcone glucoside	Flavonoids	Chalcones	-	1	1.22106e+06	1.43332e+06	1.56344e+06	707742	667389	664555	1.08954e+06	1.12721e+06	1.08577e+06	816646	930248	918597	-	-	-	-	-	-	-	-	-	-	-	-	-	-	-	-	-	1.24504	0.0168565	0.483588	-1.04815	down
C23H16O11	Isorhamnetin-3-O-gallate	Flavonoids	Flavonols	-	3	375536	264519	75225.2	2.86813e+06	2.63285e+06	2.64322e+06	1.20112e+06	1.48883e+06	1.22873e+06	1.0571e+06	1.17555e+06	1.18239e+06	-	-	-	-	-	-	-	1.20042	0.000351719	0.481162	-1.05541	down	1.1638	0.001099	5.47852	2.45379	up	1.19584	3.32192e-05	11.386	3.50919	up
C27H44O8	5-Pregnene-3,17,20-triol-20-O-glucoside	Steroids	Cardiac glycoside	-	2	37736.8	29772.5	38420.9	14231.9	8277.69	13043.2	12183.2	12795.3	10787.8	18163.2	15216.3	18083.2	-	-	-	-	-	-	-	-	-	-	-	-	1.28818	0.0110541	0.337639	-1.56645	down	1.20544	0.00361724	0.335625	-1.57508	down
C24H36N4O9	Thr-Tyr-Leu-Glu	Amino acids and derivatives	Amino acids and derivatives	-	3	1.64316e+07	1.6369e+07	2.66848e+07	2.2143e+07	2.16197e+07	1.2173e+07	6.84653e+06	7.60583e+06	1808075	8.39209e+06	8.37409e+06	8.6219e+06	-	-	-	-	-	-	-	-	-	-	-	-	1.08282	0.0331574	0.273352	-1.87117	down	-	-	-	-	-
C14H21NO8	Pyridoxine-5'-O-glucoside	Others	Vitamin	-	3	9.78343e+06	1.4415e+07	1.05379e+07	2.61101e+07	2.91409e+07	2.87868e+07	1.63528e+07	1.76228e+07	1.41238e+07	1.38767e+07	1.47782e+07	1.76095e+07	C03996	-	-	-	-	-	-	-	-	-	-	-	-	-	-	-	-	1.22689	0.00128653	2.41931	1.27459	up
C7H6O4	3,4-Dihydroxybenzoic acid (Protocatechuic acid)*	Phenolic acids	Phenolic acids	99-50-3	3	3.05461e+06	2.16475e+06	2.36157e+06	197532	294274	356777	318446	889207	1.02412e+06	431962	474204	361744	C00230	ko01100,ko01110	-	-	-	-	-	-	-	-	-	-	1.13667	0.00761043	0.294394	-1.76418	down	1.24952	0.0122681	0.111937	-3.15924	down
C9H10O2	4'-Hydroxypropiophenone	Phenolic acids	Phenolic acids	70-70-2	3	42165.3	36052.8	32413.5	450353	449369	438669	253328	263104	249750	293440	312737	292426	C13342	-	-	-	-	-	-	-	-	-	-	-	1.30603	4.35073e-06	6.92553	2.79192	up	1.26822	2.58459e-07	12.0977	3.59666	up
C15H20O10	Syringoyl-D-Glucose	Phenolic acids	Phenolic acids	-	2	9632.96	6433.88	8716.54	62402.5	62403.7	60701.7	22512.4	30536.9	21127.6	19837.1	21223.5	33637	-	-	-	-	-	-	-	1.18957	0.0048659	0.399858	-1.32244	down	1.25464	0.0218025	2.99301	1.5816	up	1.2597	8.9767e-06	7.48517	2.90404	up
C19H27NO12	Anthranilate-1-O-Sophoroside	Phenolic acids	Phenolic acids	-	3	2.28493e+06	1.87697e+06	1.99847e+06	3.4547e+06	3.38477e+06	3.1613e+06	4.42916e+06	3.71204e+06	4.3371e+06	3.99868e+06	2.8453e+06	3.85266e+06	-	-	-	-	-	-	-	-	-	-	-	-	1.27902	0.00346107	2.02558	1.01833	up	-	-	-	-	-
C11H20N2O6	L-Saccharopine	Amino acids and derivatives	Amino acids and derivatives	997-68-2	3	63419.6	92402.7	48293.6	98016.9	88054.9	76830.5	44920.1	36120.2	45373.7	63293.8	57201.4	53675.3	C00449	ko00300,ko00310,ko01100,ko01110,ko01230	-	-	-	-	-	1.17791	0.00751122	0.48084	-1.05637	down	-	-	-	-	-	-	-	-	-	-
C21H42NO7P	LysoPE 16:1(2n isomer)	Lipids	LPE	-	3	348926	87837.1	182644	315871	280846	288583	133331	141195	113915	198756	205486	194425	-	-	-	-	-	-	-	1.20608	0.000357791	0.438768	-1.18847	down	-	-	-	-	-	-	-	-	-	-
C15H10O7	Quercetin	Flavonoids	Flavonols	117-39-5	3	422523	323297	419805	743610	898612	677281	220588	307843	320780	474933	337083	440676	C00389	ko00941,ko00944,ko01100,ko01110	-	-	-	-	-	1.17534	0.00763071	0.366118	-1.44962	down	-	-	-	-	-	-	-	-	-	-
C7H14N2O3	N-α-Acetyl-L-ornithine	Amino acids and derivatives	Amino acids and derivatives	6205-08-9	2	304602	1.11221e+06	367569	3.88341e+06	3.8939e+06	3.51119e+06	5.37485e+06	5.43205e+06	5.16384e+06	2.31707e+06	2.50691e+06	2.60952e+06	C00437	ko00220,ko01100,ko01110,ko01210,ko01230	1.29061	1.8066e-05	0.465445	-1.10332	down	-	-	-	-	-	1.23688	0.00141691	8.95027	3.16193	up	1.18282	0.00189953	6.32626	2.66135	up
C18H30N6O9	Asn-Val-Gln-Asp	Amino acids and derivatives	Amino acids and derivatives	-	3	1.37583e+07	3.14174e+06	1.60352e+07	3.40054e+06	3.64033e+06	3.21207e+06	2.92245e+06	3.33035e+06	3.38893e+06	6.24904e+06	6.76946e+06	6.49512e+06	-	-	1.28287	9.73248e-05	2.02387	1.01712	up	-	-	-	-	-	-	-	-	-	-	-	-	-	-	-
C21H28O10	Erythro-Guaiacylglycerol-β-threo-syringylglycerol Ether	Lignans and Coumarins	Lignans	1313434-74-0	2	692724	656841	741940	5.3806e+06	5.46755e+06	5.31332e+06	2.08155e+06	2.17111e+06	2.02901e+06	2.14209e+06	2.1555e+06	2.17193e+06	-	-	-	-	-	-	-	1.22279	7.46943e-07	0.388682	-1.36334	down	1.30618	4.84312e-05	3.00342	1.58661	up	1.26855	1.86033e-06	7.7272	2.94994	up
C14H18N2O5	γ-Glutamylphenylalanine	Amino acids and derivatives	Amino acids and derivatives	7432-24-8	3	95046.1	111308	50370.7	140296	137872	145729	35132.6	58914.5	48335.1	51595.3	44945.9	68237.2	-	-	-	-	-	-	-	1.18027	0.00258066	0.335889	-1.57394	down	-	-	-	-	-	-	-	-	-	-
C12H16O7	Arbutin	Phenolic acids	Phenolic acids	497-76-7	3	93338.5	238423	125845	1.31705e+06	1.37226e+06	1.25825e+06	350167	679168	643736	1.44654e+06	1.41748e+06	1.38472e+06	C06186	ko00010	1.18833	0.012528	2.53948	1.34453	up	1.10329	0.0122657	0.423824	-1.23846	down	1.15567	0.0444145	3.65614	1.87032	up	1.2346	5.28119e-05	8.62654	3.10878	up
C6H11NO4	O-Acetyl-L-homoserine	Amino acids and derivatives	Amino acids and derivatives	250736-84-6	3	332704	377184	312854	86816.6	168902	131420	145872	152620	150839	197757	187050	228173	-	-	-	-	-	-	-	-	-	-	-	-	1.29799	0.00915416	0.43934	-1.18659	down	1.17742	0.00264346	0.37853	-1.40152	down
C7H10O5	2-Methyl-3-oxoadipic acid*	Organic acids	Organic acids	-	3	199323	6747.7	35421.2	352301	362184	332486	98768.7	147173	115745	25253.2	47659.7	56004.4	C18307	-	1.15959	0.0144268	0.356434	-1.48829	down	1.19508	0.000482776	0.34546	-1.53341	down	-	-	-	-	-	-	-	-	-	-
C7H10O5	2-Oxoheptanedionic acid*	Organic acids	Organic acids	17126-90-8	3	199323	6747.7	35421.2	352301	362184	332486	98768.7	147173	115745	25253.2	47659.7	56004.4	C16588	ko01100,ko01210,ko01240	1.15959	0.0144268	0.356434	-1.48829	down	1.19508	0.000482776	0.34546	-1.53341	down	-	-	-	-	-	-	-	-	-	-
C16H18O9	1-Caffeoylquinic acid	Phenolic acids	Phenolic acids	1241-87-8	1	147964	63573.5	104756	4.91289e+06	5.46163e+06	4.96242e+06	1.97303e+06	1.93883e+06	1.91122e+06	385805	397945	356843	-	-	1.29575	1.01167e-06	0.195875	-2.352	down	1.22078	0.00279838	0.379677	-1.39716	down	1.29361	1.20555e-06	18.4104	4.20245	up	1.25912	0.00101327	48.4897	5.59961	up
C14H20O9	Leonuriside A	Phenolic acids	Phenolic acids	121748-12-7	1	31755.3	29603.7	30977.4	343316	347092	345287	64567.9	96086	154987	346628	362856	369717	-	-	1.20707	0.00751662	3.41907	1.7736	up	1.13172	0.0118629	0.304763	-1.71424	down	1.19882	0.106723	3.41839	1.77332	up	1.26963	5.68998e-08	11.2165	3.48756	up
C6H13NO2	D-Allo-Isoleucine	Amino acids and derivatives	Amino acids and derivatives	1509-35-9	1	1.63622e+06	4.85031e+06	1.28577e+06	1.29358e+07	1.40273e+07	1.42194e+07	4.92905e+06	4.72709e+06	4.79667e+06	5.91e+06	2.44473e+06	2.34055e+06	-	-	-	-	-	-	-	1.22158	0.00165643	0.350945	-1.51068	down	-	-	-	-	-	1.16685	0.00544685	5.29863	2.40562	up
C21H34N6O7	Val-His-Leu-Asp	Amino acids and derivatives	Amino acids and derivatives	-	3	1.58962e+07	2.60316e+07	3.44739e+07	1.29823e+07	1.40917e+07	1.2918e+07	6.01925e+06	7.35736e+06	7.07276e+06	5.17439e+06	5.33552e+06	4.71456e+06	-	-	-	-	-	-	-	-	-	-	-	-	1.23218	0.0730258	0.267656	-1.90155	down	-	-	-	-	-
C9H14N4O3	L-Carnosine	Amino acids and derivatives	Amino acids and derivatives	305-84-0	3	451832	122323	391338	255205	324172	320193	409845	298101	344623	184183	117499	124320	C00386	ko00340,ko00410,ko01100	1.21654	0.00865805	0.404725	-1.30499	down	-	-	-	-	-	-	-	-	-	-	-	-	-	-	-
C15H18O8	4-O-beta-D-glucosyl-4-coumaric acid	Organic acids	Organic acids	14364-05-7	3	675356	248281	482959	774250	701952	856496	795436	891930	780611	281371	312107	406814	C04415	-	1.25628	0.000701101	0.405308	-1.30291	down	-	-	-	-	-	-	-	-	-	-	-	-	-	-	-
C10H13N4O7P	2'-Deoxyinosine-5'-monophosphate	Nucleotides and derivatives	Nucleotides and derivatives	3393-18-8	3	1.7396e+07	4.55459e+06	1.9417e+07	4.9554e+06	4.45112e+06	4.13536e+06	414865	353768	335912	3.65917e+06	3.48493e+06	3.2108e+06	C06196	ko00230,ko01232	1.29407	0.00132498	9.37481	3.22879	up	1.22148	0.00305355	0.0815651	-3.6159	down	1.26169	0.102151	0.0267007	-5.22698	down	-	-	-	-	-
C14H18O8	Glucovanillin	Others	Aldehyde compounds	494-08-6	3	9819.25	80581.3	8781.28	307285	286018	287137	233795	538582	235200	109567	588020	504684	C19808	-	-	-	-	-	-	-	-	-	-	-	1.142	0.0891401	10.1589	3.34467	up	1.12962	0.00509325	8.87704	3.15008	up
C22H28O14	4-O-(3'-O-alpha-D-Glucopyranosyl)caffeoylquinic acid	Phenolic acids	Phenolic acids	1401352-63-3	1	4.70949e+06	4.92926e+06	5.35443e+06	3.02299e+06	3.13217e+06	3.07857e+06	377256	335026	354332	227649	258926	241685	-	-	-	-	-	-	-	1.22317	1.81073e-05	0.115513	-3.11388	down	1.3087	0.00159659	0.0711399	-3.8132	down	-	-	-	-	-
C6H13NO2	L-Norleucine	Amino acids and derivatives	Amino acids and derivatives	327-57-1	1	4.727e+06	4.95553e+06	1.34715e+06	1.29413e+07	1.38168e+07	1.374e+07	4.98533e+06	4.93095e+06	4.65609e+06	5.70316e+06	5.81967e+06	2.38861e+06	C01933	-	-	-	-	-	-	1.22206	0.0002998	0.359829	-1.47462	down	-	-	-	-	-	1.10332	0.0104866	3.67173	1.87646	up
C15H23N6O5S+	S-Adenosylmethionine	Amino acids and derivatives	Amino acids and derivatives	485-80-3	3	9.41613e+06	5.61337e+06	6.28063e+06	3.14964e+06	3.39252e+06	3.2824e+06	2.71829e+06	2.69471e+06	3.01112e+06	3.4954e+06	3.67218e+06	3.66753e+06	-	-	-	-	-	-	-	-	-	-	-	-	1.23061	0.0660294	0.39531	-1.33894	down	1.16961	0.0818237	0.461027	-1.11708	down
C14H18O8	Mandelic acid-β-glucoside	Organic acids	Organic acids	-	2	68405.2	82140	53742.2	544400	560114	608556	424553	431507	342059	277689	247805	242193	-	-	-	-	-	-	-	-	-	-	-	-	1.29288	0.00460797	5.86487	2.5521	up	1.26306	0.000318373	8.38559	3.06791	up
C17H29N7O10	Ser-Asp-Arg-Asp	Amino acids and derivatives	Amino acids and derivatives	-	3	693087	1.31905e+06	1.10371e+06	6.84424e+06	7.87906e+06	7.52324e+06	2.96132e+06	3.19341e+06	2.50402e+06	2.21002e+06	2.19029e+06	2.21783e+06	-	-	-	-	-	-	-	1.20655	0.000522679	0.389218	-1.36135	down	1.2172	0.00258585	2.77894	1.47453	up	1.24631	0.000212429	7.13981	2.83588	up
C8H6O4	Piperonylic acid	Organic acids	Organic acids	94-53-1	2	1.15657e+06	879364	853393	4.1814e+07	4.20834e+07	4.2964e+07	2.17037e+07	2.18092e+07	2.15206e+07	1.3295e+07	1.35875e+07	1.33431e+07	-	-	-	-	-	-	-	-	-	-	-	-	1.3077	1.20756e-08	22.5082	4.49238	up	1.26856	2.17134e-05	43.9069	5.45637	up
C29H34N6O8	Tyr-Phe-His-Glu	Amino acids and derivatives	Amino acids and derivatives	-	3	890882	429856	251581	1.63677e+06	1.61582e+06	1.52445e+06	970006	1.08974e+06	1.05825e+06	1.06927e+06	1.18725e+06	1.0835e+06	-	-	-	-	-	-	-	-	-	-	-	-	-	-	-	-	-	1.09942	0.0271479	3.03822	1.60322	up
C27H34O12	Balanophonin E glucoside	Lignans and Coumarins	Lignans	-	3	501907	186492	527204	256557	194105	207432	117323	108760	149754	170598	281146	237265	-	-	-	-	-	-	-	-	-	-	-	-	1.0953	0.123363	0.309177	-1.69349	down	-	-	-	-	-
C27H30O16	Quercetin-3-O-robinobioside	Flavonoids	Flavonols	52525-35-6	3	704559	1.30492e+06	1.46043e+06	233954	261536	388823	878841	1.27925e+06	1.16302e+06	105933	100608	162130	-	-	1.27842	0.0125154	0.111008	-3.17126	down	1.17721	0.0116776	3.75558	1.90904	up	-	-	-	-	-	1.17833	0.0592276	0.254851	-1.97227	down
C27H38O19	O-Caffeoyl maltotriose	Phenolic acids	Phenolic acids	-	3	146438	106866	94807.1	203167	211439	155787	16564.8	33495.8	24031.8	113309	115171	149421	-	-	1.2528	0.00617249	5.1004	2.35061	up	1.19577	0.00715649	0.129897	-2.94456	down	1.25185	0.0201654	0.212841	-2.23215	down	-	-	-	-	-
C5H4N4O3	Uric acid	Nucleotides and derivatives	Nucleotides and derivatives	69-93-2	3	38473.7	67787.3	69370.4	35778.9	22953.3	33567.7	11513.4	14822.2	6953.98	40443.7	53964.5	52676.8	-	-	1.23641	0.00421595	4.41835	2.14351	up	1.09724	0.0202585	0.360667	-1.47126	down	1.23732	0.0364666	0.189542	-2.39941	down	-	-	-	-	-
C11H12N2O2	cyclo-(Gly-Phe)	Amino acids and derivatives	Amino acids and derivatives	10125-07-2	1	159784	159421	157113	1.12325e+06	1.29188e+06	1.25092e+06	141206	143648	123999	493608	479928	579767	-	-	1.28871	0.00519472	3.79918	1.92569	up	1.22214	0.00191964	0.111524	-3.16458	down	-	-	-	-	-	1.26886	0.00226803	7.69665	2.94423	up
C12H14O8	Dihydroxybenzoyl xyloside	Phenolic acids	Phenolic acids	-	2	1.20338e+06	546841	1.77891e+06	256363	301312	305561	155055	119283	157748	264056	261642	245037	-	-	-	-	-	-	-	-	-	-	-	-	1.2312	0.100974	0.122435	-3.02992	down	1.12536	0.129615	0.244603	-2.03149	down
C14H20O9	2,6-dimethoxy-hydroquinone-4-O-β-D-glucopyranoside	Phenolic acids	Phenolic acids	-	2	537076	778352	832523	1.76431e+06	1.73953e+06	2.33038e+06	90690.5	712211	693259	1.1109e+06	1.10993e+06	1.19535e+06	-	-	-	-	-	-	-	-	-	-	-	-	-	-	-	-	-	1.20413	0.0120038	2.71618	1.44158	up
C24H22O13	Sinapoylcaffeoyltartaric acid	Phenolic acids	Phenolic acids	-	3	96944.9	139188	265788	35721.8	38739.6	36786.8	13234.4	29657.2	25992.6	40182.4	21046.7	33240.1	-	-	-	-	-	-	-	-	-	-	-	-	1.2209	0.103119	0.137241	-2.86522	down	1.17745	0.124073	0.221644	-2.17368	down
C57H90O25	Marstenacisside B9	Steroids	Steroidal saponins	-	1	402234	85956.2	352523	5.09312e+06	4.927e+06	6.25517e+06	6.93895e+06	7.5736e+06	8.48082e+06	912747	1.05878e+06	1.11503e+06	-	-	1.29251	0.00396697	0.134237	-2.89714	down	-	-	-	-	-	1.26158	0.00255359	27.3499	4.77346	up	1.2069	0.00462435	19.3589	4.27493	up
C42H68O13	Oleanolic acid-3-O-glucosyl(1→2)glucoside	Terpenoids	Triterpene Saponin	-	3	8974.16	30042.3	11251.7	32648	30027.8	27709.9	4860.71	3869.75	7940.11	7701.85	5828.64	9223.39	-	-	-	-	-	-	-	1.18539	0.000226534	0.184438	-2.43879	down	1.00206	0.232863	0.331633	-1.59234	down	-	-	-	-	-
C7H10O5	Shikimic acid	Organic acids	Organic acids	138-59-0	3	346439	239396	335837	154916	150650	160988	92524.6	95304.3	84963.3	129671	110816	132511	C00493	ko00400,ko00996,ko00999,ko01100,ko01110,ko01230,ko01240	-	-	-	-	-	-	-	-	-	-	1.2816	0.0231373	0.295975	-1.75645	down	-	-	-	-	-
C5H10O4	2,3-Dihydroxy-3-Methylbutanoic Acid	Organic acids	Organic acids	1756-18-9	2	2.26428e+07	1.7682e+07	3.14481e+07	1.2903e+07	1.40707e+07	1.24592e+07	6.30945e+06	4.37453e+06	4.79898e+06	3.95186e+06	4.53254e+06	3.1349e+06	C04039	-	-	-	-	-	-	1.18947	0.00056212	0.39264	-1.34872	down	1.26543	0.040568	0.215722	-2.21276	down	-	-	-	-	-
C6H13NO2	DL-Leucine	Amino acids and derivatives	Amino acids and derivatives	328-39-2	1	7.241e+06	4.58755e+06	4.71013e+06	2.19991e+07	3.63974e+07	1.7227e+07	4.92647e+06	5.36126e+06	5.33445e+06	1.01222e+07	1.74872e+07	1.11431e+07	-	-	1.20842	0.0783245	2.48061	1.3107	up	1.17522	0.0738248	0.206578	-2.27524	down	-	-	-	-	-	1.19724	0.0728761	4.57253	2.19299	up
C23H27NO8	Dubiusine	Alkaloids	Alkaloids	119308-98-4	3	5.84608e+06	1.0932e+07	6.62142e+06	221507	199750	274527	496165	536309	524135	768612	740802	702938	C12240	-	-	-	-	-	-	1.19104	0.00132569	2.2372	1.1617	up	1.29743	0.0441028	0.0665232	-3.91	down	1.25944	0.0410034	0.029735	-5.07169	down
C21H30N4O9	Tyr-Thr-Ala-Glu	Amino acids and derivatives	Amino acids and derivatives	-	3	823766	816323	1.29809e+06	1.1527e+06	1.05137e+06	996906	320279	305823	273399	477090	464147	526003	-	-	-	-	-	-	-	1.21834	0.00179967	0.281008	-1.83132	down	1.26286	0.0498587	0.306142	-1.70773	down	-	-	-	-	-
C16H26N6O5S1	Met-Gln-His	Amino acids and derivatives	Amino acids and derivatives	-	3	430673	594518	645401	274094	274390	249920	62126.8	140755	141247	309228	208787	211082	-	-	1.03552	0.041169	2.11867	1.08316	up	1.04414	0.0211649	0.43102	-1.21417	down	1.23249	0.011568	0.205992	-2.27934	down	1.20032	0.0443159	0.477917	-1.06517	down
C25H24O13	Feruloylsinapoyltartaric acid	Phenolic acids	Phenolic acids	-	3	9480.72	2574.72	5106.03	111215	86782.6	127708	18564.3	12015	13687.8	10097.2	11816.1	3931.64	-	-	-	-	-	-	-	1.2065	0.0138046	0.135911	-2.87926	down	1.05582	0.0326575	2.57944	1.36706	up	1.2287	0.0113401	18.9789	4.24632	up
C11H12N2O4	(2-Oxo-5-methoxyindoline-1-yl)carbamic acidmethylester	Alkaloids	Alkaloids	-	2	30136.7	31761.3	34764.8	315954	334193	365211	249978	213419	188937	247895	160263	217616	-	-	-	-	-	-	-	-	-	-	-	-	1.30387	0.00874192	6.74856	2.75458	up	1.26778	0.00203533	10.5041	3.39289	up
C8H16N2O3	L-Glycyl-L-isoleucine	Amino acids and derivatives	Amino acids and derivatives	19461-38-2	3	360243	458061	269271	102577	180213	71966.2	170473	284678	158941	239167	277928	258954	-	-	-	-	-	-	-	-	-	-	-	-	-	-	-	-	-	1.1191	0.0267301	0.32619	-1.61621	down
C5H4O3	3-Furoic acid	Organic acids	Organic acids	488-93-7	3	138674	110128	112697	300229	301054	159930	245647	98065.3	232521	189932	197860	201205	-	-	-	-	-	-	-	-	-	-	-	-	-	-	-	-	-	1.07656	0.0997759	2.10571	1.07431	up
C14H17N5O8	Succinyladenosine	Nucleotides and derivatives	Nucleotides and derivatives	4542-23-8	1	2.62978e+06	5.167e+06	2.6764e+06	5.64429e+06	5.91597e+06	6.13244e+06	1.08313e+07	9.76876e+06	1.05656e+07	4.14982e+06	3.6412e+06	3.95686e+06	-	-	1.29018	0.000501428	0.376949	-1.40756	down	-	-	-	-	-	1.21662	0.00772137	2.97576	1.57326	up	-	-	-	-	-
C20H23N7O7	10-Formyltetrahydrofolic Acid	Alkaloids	Alkaloids	2800-34-2	2	9.67485e+06	4.65836e+06	1.26285e+07	1.10948e+07	1.11867e+07	1.20049e+07	1.17263e+07	1.07358e+07	1.09173e+07	3.92555e+06	3.65668e+06	3.73572e+06	C00234	ko00670,ko00970,ko01100,ko01200,ko01240	1.29419	0.000932424	0.33907	-1.56035	down	-	-	-	-	-	-	-	-	-	-	-	-	-	-	-
C10H15NO5	3-Methoxy-L-Tyrosine	Amino acids and derivatives	Amino acids and derivatives	200630-46-2	3	231631	372733	210140	260591	284820	288210	691489	578049	559456	470439	434036	454273	-	-	-	-	-	-	-	1.202	0.0122858	2.19404	1.13359	up	1.19254	0.00753801	2.24553	1.16706	up	-	-	-	-	-
C11H10O4	(Z)-3-Ethylidene-7-hydroxy-6-methoxyphthalide	Others	Others	-	2	614477	283124	242904	148104	161795	114421	421584	516148	380790	196498	239880	161111	-	-	1.21809	0.0119544	0.453151	-1.14194	down	1.18875	0.0106979	3.10738	1.6357	up	-	-	-	-	-	1.05141	0.178131	0.372046	-1.42645	down
C24H26N4O6	Asp-Phe-Trp	Amino acids and derivatives	Amino acids and derivatives	-	3	532138	554598	637698	579221	694977	661008	1.08276e+06	1.20993e+06	1.24441e+06	830255	1.16401e+06	996867	-	-	-	-	-	-	-	-	-	-	-	-	1.28456	0.00104912	2.05117	1.03645	up	-	-	-	-	-
C23H32N2O11	Tryptophan N-Rutinoside	Alkaloids	Plumerane	-	1	138378	112197	131091	283815	372218	312084	52204	93849.2	79836.8	455506	450838	401923	-	-	1.27147	0.000135161	5.79161	2.53396	up	1.1838	0.00407299	0.233329	-2.09956	down	-	-	-	-	-	1.23923	0.0118679	2.53655	1.34287	up
C8H9NO	N-benzylformamide	Alkaloids	Alkaloids	6343-54-0	3	425157	289752	319873	2.2293e+06	2.65465e+06	2.84266e+06	493402	521300	644844	875466	889513	1.03959e+06	C15561	-	-	-	-	-	-	1.21086	0.00542416	0.214783	-2.21905	down	-	-	-	-	-	1.25838	0.00475478	7.46691	2.90051	up
C19H26N4O5S1	Met-Trp-Ser	Amino acids and derivatives	Amino acids and derivatives	-	3	914301	1.49999e+06	903049	2.89343e+06	2.93282e+06	2.92192e+06	2.45399e+06	2.59841e+06	2.91361e+06	2.10899e+06	1.9583e+06	1.91886e+06	-	-	-	-	-	-	-	-	-	-	-	-	1.21875	0.00439359	2.40132	1.26383	up	1.20865	0.0114331	2.6371	1.39895	up
C12H23O14P	Trehalose 6-phosphate	Others	Saccharides	4484-88-2	3	2.3899e+06	1.11925e+06	1.61438e+06	2.31954e+06	2.66699e+06	2.65687e+06	828950	794876	720149	1.64002e+06	1.42663e+06	1.56436e+06	C00689	ko00500,ko01100,ko01110	-	-	-	-	-	1.21768	0.00237999	0.306666	-1.70526	down	1.11492	0.128084	0.457492	-1.12818	down	-	-	-	-	-
C21H30N4O7	Val-Ala-Phe-Asp	Amino acids and derivatives	Amino acids and derivatives	-	3	223870	129260	195647	114487	121875	119062	248287	236160	244331	179601	173509	164767	-	-	-	-	-	-	-	1.2212	4.09945e-05	2.05045	1.03594	up	-	-	-	-	-	-	-	-	-	-
C11H11NO4	Methyl dioxindole-3-acetate	Alkaloids	Plumerane	57061-18-4	1	3.15185e+06	2.59293e+06	3.10881e+06	1.82527e+06	1.61086e+06	1.84484e+06	1.72562e+06	1.5713e+06	1.6089e+06	698502	597275	585686	-	-	1.28583	0.000103902	0.383517	-1.38264	down	-	-	-	-	-	-	-	-	-	-	-	-	-	-	-
C10H13NO4	Methyldopa	Amino acids and derivatives	Amino acids and derivatives	555-30-6	3	443757	483644	303916	530642	719907	862931	1.61699e+06	1.50254e+06	1.69127e+06	1.30656e+06	1.48169e+06	1.41716e+06	C07194	-	-	-	-	-	-	1.15653	0.00315952	2.27625	1.18666	up	1.28131	0.000103084	3.90703	1.96607	up	-	-	-	-	-
C16H12O6	Diosmetin (5,7,3'-Trihydroxy-4'-methoxyflavone)	Flavonoids	Flavones	520-34-3	3	58494.9	56912.3	322252	30927.1	17183.1	32944.7	14597.9	18299.3	16320.9	22945	23615.1	6822.19	C10038	-	-	-	-	-	-	-	-	-	-	-	1.11044	0.279744	0.112457	-3.15255	down	-	-	-	-	-
C10H8O3	2-Methoxy-1-benzofuran-5-carbaldehyde	Others	Others	-	2	576821	471176	611590	2.00076e+06	1.57768e+06	1.6364e+06	501378	679091	579870	343027	353359	476467	-	-	-	-	-	-	-	1.19736	0.00657263	0.337564	-1.56677	down	-	-	-	-	-	1.24601	0.0074914	3.14225	1.6518	up
C6H10O8	D-Saccharic acid	Others	Saccharides	87-73-0	1	9.36071e+06	7.90242e+06	5.89283e+06	1.93057e+07	1.98714e+07	1.9891e+07	9.9468e+06	9.77464e+06	9.85093e+06	1.56168e+07	1.57011e+07	1.96552e+07	C00818	ko00053,ko01100	-	-	-	-	-	-	-	-	-	-	-	-	-	-	-	1.2254	0.0055677	2.55088	1.351	up
C4H6O4	Methylmalonic acid	Organic acids	Organic acids	516-05-2	1	9.38979e+07	1.19482e+08	6.70376e+07	3.21471e+07	2.43709e+07	2.24043e+07	4.14461e+07	6.12799e+07	5.4243e+07	7.32625e+07	7.32131e+07	7.28807e+07	C02170	ko00240,ko00280,ko00640,ko01100	-	-	-	-	-	-	-	-	-	-	-	-	-	-	-	1.20485	0.042751	0.281446	-1.82907	down
C6H14O6	D-Mannitol	Others	Saccharides	69-65-8	1	66250.5	84827.4	117431	349537	382916	371030	343982	368043	375264	381330	365009	303495	C00392	ko00051,ko01100,ko02010	-	-	-	-	-	-	-	-	-	-	1.27302	0.000299519	4.04937	2.0177	up	1.23379	0.000258192	4.10967	2.03902	up
C8H6O4	5,7-Dihydroxy-1(3H)-isobenzofuranone	Phenolic acids	Phenolic acids	27979-58-4	3	129708	79237.2	132926	226483	158117	353025	47157.1	99347.1	73281.7	85814.3	79323.8	110352	-	-	-	-	-	-	-	1.08141	0.0856307	0.297964	-1.74679	down	-	-	-	-	-	-	-	-	-	-
C17H14O13	Ditartaroyl-hydroxycoumarin	Lignans and Coumarins	Coumarins	-	3	1198360	896652	742351	222741	330081	323378	347612	352794	312439	607965	205269	273428	-	-	-	-	-	-	-	-	-	-	-	-	1.25702	0.04411	0.356967	-1.48614	down	1.2066	0.0327137	0.308808	-1.69522	down
C21H22O11	Eriodictyol-3'-O-glucoside	Flavonoids	Flavanones	-	3	8113.6	11391.2	18305.5	19535.4	8240.75	20188.8	41478.2	51848.8	43418.3	1832.95	13804.4	3654.37	-	-	1.15265	0.00146901	0.141078	-2.82543	down	1.07775	0.00464437	2.85095	1.51144	up	1.22674	0.00168382	3.61661	1.85464	up	-	-	-	-	-
C21H22O11	Dunalianoside B	Phenolic acids	Phenolic acids	-	3	8113.6	11391.2	18305.5	19535.4	8240.75	20188.8	41478.2	51848.8	43418.3	1832.95	13804.4	3654.37	-	-	1.15265	0.00146901	0.141078	-2.82543	down	1.07775	0.00464437	2.85095	1.51144	up	1.22674	0.00168382	3.61661	1.85464	up	-	-	-	-	-
C12H18O3	Jasmonic acid	Organic acids	Organic acids	77026-92-7	3	2.23174e+06	4.97368e+06	2.98289e+06	120912	131796	148351	251068	232112	196723	591850	650867	578728	C08491	ko00592,ko01100,ko01110,ko04075	1.27999	0.000278382	2.67898	1.42168	up	-	-	-	-	-	1.28916	0.0605704	0.0667337	-3.90544	down	1.25443	0.0574927	0.0393646	-4.66696	down
C21H36O10	Geranyl 3-O-xylopyranosyl-glucopyranoside	Others	Others	-	1	5.34212e+06	5.0572e+06	5.07594e+06	1.47207e+07	1.49622e+07	1.44061e+07	1.46326e+06	1.48321e+06	1.57897e+06	3.10237e+06	3.56547e+06	3.00022e+06	-	-	1.28184	0.008056	2.13638	1.09517	up	1.22332	7.5634e-05	0.102643	-3.28429	down	1.30801	0.000134444	0.29243	-1.77384	down	1.26906	9.39222e-06	2.849	1.51046	up
C15H23N3O4	Lys-Tyr	Amino acids and derivatives	Amino acids and derivatives	35978-98-4	3	4.89859e+06	3.29238e+06	4.31388e+06	901937	777807	939900	1.68243e+06	1.40702e+06	1.45776e+06	1.43517e+06	1.31831e+06	1.54185e+06	-	-	-	-	-	-	-	-	-	-	-	-	1.26549	0.0267539	0.363635	-1.45944	down	1.25374	0.018793	0.20949	-2.25505	down
C9H17N3O4S	Met-Asn	Amino acids and derivatives	Amino acids and derivatives	36261-61-7	3	20542.6	19172.6	63350	11259.2	6972.29	10830.2	11180.6	21234	22226.8	29863	24499.2	19765.8	-	-	-	-	-	-	-	-	-	-	-	-	-	-	-	-	-	1.03038	0.23029	0.281974	-1.82637	down
C7H12N2O4	N-Acetyl-L-Glutamine	Amino acids and derivatives	Amino acids and derivatives	2490-97-3	3	291380	215414	218256	718603	797796	835627	278815	257935	279916	257267	246961	272091	-	-	-	-	-	-	-	1.21775	0.0033316	0.347218	-1.52609	down	-	-	-	-	-	1.24963	0.000376254	3.24396	1.69775	up
C21H24O8	2'-Hydroxy-3,4,5,3',4',6'-hexameth-oxychalcone	Flavonoids	Chalcones	-	3	81221	129065	50057.8	41833.4	138174	55649.2	9	9	9	9	9	9	-	-	-	-	-	-	-	1.21987	0.120663	0.000114574	-13.0914	down	1.30739	0.063507	0.000103709	-13.2352	down	-	-	-	-	-
C10H13N5O6	8-Hydroxyguanosine	Nucleotides and derivatives	Nucleotides and derivatives	3868-31-3	3	127505	103399	76557.8	64775.9	65569.7	44744.1	117461	113120	237456	210267	97311.1	34513.7	-	-	-	-	-	-	-	1.06185	0.135162	2.67313	1.41853	up	-	-	-	-	-	-	-	-	-	-
C30H48O3	3-Hydroxylup-20(29)-en-28-oic acid (Betulinic acid)	Terpenoids	Triterpene	472-15-1	1	92815.3	154546	150536	1.14822e+06	1.11531e+06	867746	517026	668477	499536	390320	378612	364897	C08619	-	-	-	-	-	-	-	-	-	-	-	1.26523	0.00849453	4.23486	2.08231	up	1.2494	0.00701267	7.86955	2.97628	up
C19H24N4O7	Thr-Asp-Trp	Amino acids and derivatives	Amino acids and derivatives	-	3	1.12045e+06	1.21043e+06	1.43749e+06	4.14754e+06	3.46824e+06	3.11603e+06	3.81801e+06	2.90153e+06	3.61443e+06	3.68287e+06	2.78022e+06	2.20949e+06	-	-	-	-	-	-	-	-	-	-	-	-	1.27843	0.00960029	2.74229	1.45538	up	1.24042	0.010958	2.84786	1.50988	up
C12H22O10	Rutinose	Others	Saccharides	90-74-4	2	443153	249745	379095	338592	399543	393858	189635	194697	170827	384783	398143	454815	C08247	-	1.2801	0.00473637	2.22953	1.15674	up	1.20393	0.00499687	0.490426	-1.02789	down	-	-	-	-	-	-	-	-	-	-
C22H28N6O9	Ser-Tyr-His-Asp	Amino acids and derivatives	Amino acids and derivatives	-	3	4.1512e+06	5.24372e+06	3.12865e+06	5.55584e+06	4.92324e+06	5.15144e+06	2.01544e+06	2.15172e+06	2.24501e+06	3.59244e+06	3.68477e+06	3.69747e+06	-	-	-	-	-	-	-	1.21647	0.001444	0.410234	-1.28548	down	-	-	-	-	-	-	-	-	-	-
C25H44N8O6	Ala-Val-His-Val-Lys	Amino acids and derivatives	Amino acids and derivatives	-	3	919336	262636	1.0765e+06	4.20387e+06	3.54812e+06	3.67997e+06	1.75976e+06	1.81309e+06	1.75808e+06	929446	1.18665e+06	1.32858e+06	-	-	-	-	-	-	-	1.21233	0.00912462	0.466318	-1.10061	down	-	-	-	-	-	1.12781	0.000829948	5.06182	2.33966	up
C17H26N6O9	His-Thr-Ser-Asp	Amino acids and derivatives	Amino acids and derivatives	-	3	877284	1.55212e+06	1.39751e+06	3.02483e+06	2.94462e+06	2.7051e+06	3.11001e+06	3.41249e+06	3.4058e+06	4.30349e+06	4.54245e+06	4.56953e+06	-	-	-	-	-	-	-	-	-	-	-	-	1.2275	0.00334196	2.59434	1.37537	up	1.16996	0.0066754	2.26672	1.18061	up
C20H40NO7P	LysoPE 15:1(2n isomer)	Lipids	LPE	-	3	68019.8	111085	97861.8	35080.7	34876.5	34683.6	49650	39701.8	46164.9	53715.1	61712.5	47848.3	-	-	-	-	-	-	-	-	-	-	-	-	1.19218	0.0593582	0.489288	-1.03124	down	1.21321	0.0458024	0.37781	-1.40427	down
C24H24O14	Eriodictyol-7-O-(6''-malonyl)glucoside	Flavonoids	Flavanones	-	3	166209	233404	157040	272580	313488	271773	89472	102677	85397.4	99021.9	143944	130042	-	-	-	-	-	-	-	1.2143	0.00203142	0.32354	-1.62798	down	1.21942	0.0551095	0.498598	-1.00405	down	-	-	-	-	-
C53H84O22	Hederagenin-3-O-[rha(1-2)-ara]-28-O-[glc(1-6)glc]	Terpenoids	Triterpene Saponin	-	2	202771	115960	187641	523637	469140	406426	202603	230437	228345	71214.7	88982.9	142042	-	-	1.15862	0.0181943	0.456979	-1.1298	down	1.19323	0.0137623	0.472687	-1.08104	down	-	-	-	-	-	1.18965	0.00280166	2.76319	1.46634	up
C4H9NO2S	S-Methyl-L-cysteine	Amino acids and derivatives	Amino acids and derivatives	1187-84-4	3	477867	308827	278100	2.28996e+06	2.78132e+06	3.02863e+06	481238	510662	524746	824467	990223	1.07211e+06	C22040	ko02010	-	-	-	-	-	1.21706	0.00945462	0.187242	-2.41702	down	-	-	-	-	-	1.25066	0.00533999	7.60702	2.92733	up
C26H42N6O6	Phe-Leu-Gln-Lys	Amino acids and derivatives	Amino acids and derivatives	-	3	9.94924e+06	905477	1.18984e+07	4.03605e+06	3.22826e+06	4.65823e+06	1.73361e+06	1.81819e+06	1.67622e+06	4.51938e+06	5.50791e+06	4.93545e+06	-	-	1.28773	0.0067977	2.86203	1.51704	up	1.18212	0.0316616	0.438499	-1.18936	down	-	-	-	-	-	-	-	-	-	-
C14H19N3O4	Phe-Ala-Gly	Amino acids and derivatives	Amino acids and derivatives	-	3	528006	322392	303247	5.60214e+06	6.10094e+06	5.98952e+06	4.43383e+06	5.25522e+06	4.80105e+06	2.33937e+06	2.08831e+06	4.11939e+06	-	-	-	-	-	-	-	-	-	-	-	-	1.29763	0.00140273	12.5603	3.6508	up	1.26026	8.81749e-05	15.3363	3.93888	up
C20H18O8	Cleomiscosin A	Steroids	Cardiac glycoside	-	3	134009	104849	65938.3	263607	366716	238889	177193	198758	184273	151461	100777	192044	-	-	-	-	-	-	-	-	-	-	-	-	-	-	-	-	-	1.16003	0.0239937	2.85179	1.51187	up
C26H45N13O9	His-Ser-Glu-Arg-Arg	Amino acids and derivatives	Amino acids and derivatives	-	3	21675	70578.3	93387	938880	1.11914e+06	892628	211111	188462	208247	195257	143137	182243	-	-	-	-	-	-	-	1.21789	0.0072524	0.205995	-2.27932	down	1.08646	0.0143908	3.27418	1.71113	up	1.21132	0.00306617	15.8945	3.99045	up
C7H7NO	Benzamide	Phenolic acids	Phenolic acids	55-21-0	3	876301	881560	878608	509070	601246	495871	209291	207280	220372	408125	524977	576609	C09815	-	1.25888	0.0274391	2.37025	1.24504	up	1.21218	0.00953409	0.396556	-1.3344	down	1.30924	4.02051e-06	0.241589	-2.04937	down	-	-	-	-	-
C27H44O8	Ergosta-5,24(28)-diene-3,20,26-triol (Podecdysone C)	Steroids	Steroid	19458-46-9	2	31015.8	25345	40067.1	5606.33	7399.52	8998.45	10559.2	11436.2	10067.4	9988.51	16524.4	17714.4	C16500	-	-	-	-	-	-	-	-	-	-	-	1.26913	0.0366797	0.332505	-1.58855	down	1.23316	0.0238873	0.228194	-2.13167	down
C19H25N5O6	His-Tyr-Thr	Amino acids and derivatives	Amino acids and derivatives	-	3	2.10005e+06	3.05694e+06	2.28635e+06	650154	643689	687634	1.0016e+06	949871	802659	1.26533e+06	1.82493e+06	1.071e+06	-	-	-	-	-	-	-	-	-	-	-	-	1.26634	0.0292265	0.370012	-1.43435	down	1.24892	0.0247069	0.266208	-1.90937	down
C30H48O5	2,3,6-Trihydroxyurs-12-en-28-oic acid (Madasiatic acid)	Terpenoids	Triterpene	26532-66-1	2	832992	2.24586e+06	1.7729e+06	1.11635e+07	7.27192e+06	7.3666e+06	2.51164e+06	3.59346e+06	2.57204e+06	2.53238e+06	3.50251e+06	1.95302e+06	-	-	-	-	-	-	-	1.1604	0.0389547	0.336297	-1.57219	down	-	-	-	-	-	1.18687	0.0233398	5.31808	2.41091	up
C11H11NO2	3-Indolepropionic acid	Alkaloids	Plumerane	830-96-6	3	162555	178440	107314	709222	736685	726479	96373.6	99702.9	107313	279765	260858	272287	-	-	1.29315	6.64035e-05	2.67943	1.42192	up	1.22283	2.03708e-05	0.139657	-2.84004	down	-	-	-	-	-	1.24973	0.000414003	4.84573	2.27671	up
C6H8O6	L-Ascorbic acid (Vitamin C)	Others	Vitamin	50-81-7	3	5335148	2.3332e+06	2.79697e+06	59308.9	32479	100040	144401	89860.9	154007	53652.4	44811.9	34617	C00072	ko00053,ko00480,ko01100,ko01110,ko01240	1.20366	0.0427118	0.342755	-1.54475	down	-	-	-	-	-	1.28578	0.06917	0.0371006	-4.75241	down	1.24454	0.0668073	0.0183299	-5.76966	down
C9H18N2O4	Threonyl-valine	Amino acids and derivatives	Amino acids and derivatives	99032-17-4	3	62866.5	132279	66423.9	31879.6	46264.4	29677.7	6.94385e+06	785386	636628	886522	811210	806014	-	-	-	-	-	-	-	1.12915	0.316384	77.5898	6.27779	up	1.1497	0.323249	31.9833	4.99925	up	1.05719	0.145109	0.41221	-1.27855	down
C2H5NO2	L-Glycine	Amino acids and derivatives	Amino acids and derivatives	56-40-6	3	429547	413621	269440	1.01166e+06	858505	909886	781294	743463	852210	867812	854972	949938	C00037	ko00230,ko00260,ko00310,ko00440,ko00460,ko00470,ko00480,ko00630,ko00730,ko00860,ko00970,ko01100,ko01110,ko01200,ko01230,ko01240,ko02010	-	-	-	-	-	-	-	-	-	-	1.21819	0.00407183	2.13639	1.09518	up	1.20901	0.00129744	2.49868	1.32117	up
C15H20N2O6	Leu-Abu-OH	Amino acids and derivatives	Amino acids and derivatives	-	3	4.41386e+07	5.97818e+07	3.80247e+07	5.19962e+07	4.96412e+07	5.43112e+07	1.94418e+07	2.88674e+07	2.75064e+07	5.02108e+07	5.07034e+07	4.1215e+07	-	-	-	-	-	-	-	1.15522	0.00475796	0.486158	-1.0405	down	-	-	-	-	-	-	-	-	-	-
C13H12O7	Cinnamoyltartaric acid	Phenolic acids	Phenolic acids	-	3	9	9	9	166645	181752	152938	34930.3	32943.6	33953.6	12432.9	16546.9	17886.6	-	-	1.24802	0.00401952	0.460253	-1.1195	down	1.22118	0.00374603	0.203113	-2.29965	down	1.30964	0.000285535	3771.39	11.8809	up	1.2699	0.00247051	18568	14.1805	up
C20H40NO7P	LysoPE 15:1	Lipids	LPE	-	3	73114.1	125877	134490	24460.4	33373.4	25137.9	51891.4	51206	50145.4	65029.6	54882.4	70712.8	-	-	-	-	-	-	-	-	-	-	-	-	1.1659	0.08852	0.459526	-1.12178	down	1.21188	0.0462014	0.248805	-2.00691	down
C22H22O11	4-O-(6'-O-Glucosylcaffeoyl)-4-hydroxybenzoic acid	Phenolic acids	Phenolic acids	-	3	4521.88	1670	2808.81	89283	88369.2	100459	11000.7	28260.1	23893.4	14453.4	13663.7	19330.8	-	-	-	-	-	-	-	1.14378	0.000565148	0.227083	-2.13871	down	1.20886	0.069959	7.0166	2.81077	up	1.25188	0.00125689	30.8989	4.94948	up
C19H28O18	Quinic acid O-di-glucuronic acid	Organic acids	Organic acids	-	3	51078.2	48938.6	49298.7	88396.7	75997.6	65353.9	91525.2	131838	129146	95320.8	113377	101122	-	-	-	-	-	-	-	-	-	-	-	-	1.25925	0.0346897	2.36083	1.2393	up	-	-	-	-	-
C25H26O14	Hesperetin-7-O-(6''-malonyl)glucoside	Flavonoids	Flavanones	-	3	97598	29907.3	43763.1	205653	87413.8	186635	201965	197185	193039	92109.5	157400	143776	-	-	-	-	-	-	-	-	-	-	-	-	1.1708	0.0196549	3.45767	1.7898	up	-	-	-	-	-
C9H17NO5	Casuarine Analogue	Alkaloids	Alkaloids	-	3	1.16042e+07	2.10468e+07	2.70034e+07	12671999	1.48785e+07	1.41132e+07	7.97981e+06	8.24523e+06	8.27244e+06	9.5498e+06	9.59928e+06	9.46466e+06	-	-	-	-	-	-	-	-	-	-	-	-	1.12596	0.120406	0.410657	-1.284	down	-	-	-	-	-
C13H21N5O4S1	Met-Gly-His	Amino acids and derivatives	Amino acids and derivatives	-	3	254655	263440	92320.3	4.11544e+07	4.74178e+07	4.2311e+07	1.36229e+07	1.53032e+07	1.38824e+07	1.44989e+07	1.48875e+07	1.61519e+07	-	-	-	-	-	-	-	1.21777	0.00254971	0.327075	-1.61231	down	1.29376	0.00123468	70.1303	6.13197	up	1.26203	0.00194338	214.417	7.74427	up
C10H14N5O8P	Guanosine 5'-monophosphate	Nucleotides and derivatives	Nucleotides and derivatives	85-32-5	3	86316.9	103729	131720	85744.9	158527	109463	359615	316149	381694	533022	581257	608261	C00144	ko00230,ko01100,ko01232	-	-	-	-	-	1.16154	0.00129905	2.98941	1.57986	up	1.27681	0.000855136	3.28642	1.71652	up	-	-	-	-	-
C4H6O6	3-carboxy-2,3-dihydroxypropanoate	Organic acids	Organic acids	-	3	2.54763e+06	1.4148e+06	1.75385e+06	6.40004e+06	6.12717e+06	5.74473e+06	1.96848e+06	1.96057e+06	1.24055e+06	1.90368e+06	1.84106e+06	1.88518e+06	-	-	-	-	-	-	-	1.19086	0.000198532	0.282926	-1.8215	down	-	-	-	-	-	1.21792	0.00131675	3.19647	1.67648	up
C16H18O9	Scopoletin-7-O-glucoside (Scopolin)	Lignans and Coumarins	Coumarins	531-44-2	3	131429	217862	44042.7	271710	248616	270373	695804	623966	634771	457038	447827	388846	C01527	ko00999,ko01110	-	-	-	-	-	1.21768	0.00145902	2.47192	1.30563	up	1.15887	0.00346099	4.96917	2.31301	up	-	-	-	-	-
C18H33NO	octadecadienoic acid amide	Alkaloids	Alkaloids	-	1	242198	323374	225589	143719	122795	118135	146202	120945	122595	141146	149497	162694	-	-	-	-	-	-	-	-	-	-	-	-	1.23268	0.0395871	0.49262	-1.02145	down	1.19305	0.0390038	0.486184	-1.04043	down
C28H24O16	Quercetin-3-O-(6''-O-galloyl)galactoside	Flavonoids	Flavonols	53171-28-1	3	6848.19	3667.66	8340	11670	14661.5	7880.68	9262.4	14049.6	10005	1612.22	6670	4441.17	-	-	1.01343	0.0302379	0.381889	-1.38878	down	-	-	-	-	-	-	-	-	-	-	-	-	-	-	-
C33H58O14	Gingerglycolipid B	Lipids	Glycerol ester	88168-90-5	1	729569	632275	742377	448573	463839	479293	269678	303937	262398	527062	547605	547993	-	-	-	-	-	-	-	-	-	-	-	-	1.29519	0.00304049	0.397302	-1.33169	down	-	-	-	-	-
C20H43NO5	2-AminoicoSane-1,6,18,19,20-pentaol	Lipids	Sphingolipids	-	1	75300.1	135747	110025	33584.5	37979.3	49629.5	86137.8	51880.6	116989	209753	51170.1	52746.1	-	-	-	-	-	-	-	-	-	-	-	-	-	-	-	-	-	1.16512	0.0540175	0.377465	-1.40559	down
C16H18O9	Cryptochlorogenic acid (4-O-Caffeoylquinic acid)*	Phenolic acids	Phenolic acids	905-99-7	1	1.33623e+07	8.01923e+06	1.03055e+07	4.03434e+07	3.89632e+07	4.02051e+07	1.4309e+07	1.47188e+07	1.26902e+07	1.61612e+07	1.57077e+07	1.48221e+07	-	-	-	-	-	-	-	1.21965	1.16973e-05	0.34907	-1.51841	down	-	-	-	-	-	1.23936	0.00148643	3.77163	1.91519	up
C22H30N4O6	Glu-Trp-Leu	Amino acids and derivatives	Amino acids and derivatives	-	3	1.50629e+06	409664	695689	953182	1.03306e+06	1.15031e+06	191122	274720	277408	89058.8	105025	105927	-	-	1.24192	0.0309868	0.403647	-1.30883	down	1.20256	0.00125301	0.236964	-2.07726	down	1.06632	0.19757	0.284591	-1.81304	down	-	-	-	-	-
C17H28N6O10	Gly-Asp-Ala-Asn-Thr	Amino acids and derivatives	Amino acids and derivatives	-	3	790543	588311	304363	8.55594e+06	8.73943e+06	7.4903e+06	6313645	4.84088e+06	4.04855e+06	5.54175e+06	4.28482e+06	5.07575e+06	-	-	-	-	-	-	-	-	-	-	-	-	1.2648	0.0175017	9.03215	3.17507	up	1.24651	0.000926918	14.7252	3.88021	up
C20H22O9	Salireposide	Phenolic acids	Phenolic acids	16955-55-8	3	33836.4	70673.3	134857	69889.9	105241	88155.4	197785	243761	173089	88297.7	39490.1	60788.5	-	-	1.19788	0.00691472	0.30681	-1.70458	down	1.14876	0.0158181	2.33447	1.2231	up	1.03857	0.0304988	2.56776	1.36051	up	-	-	-	-	-
C7H10O7	Homocitrate	Organic acids	Organic acids	13052-73-8	2	602858	624606	453255	1.70514e+06	5.68988e+06	5.50559e+06	1.42565e+06	2.61654e+06	789938	583170	1.82989e+06	1.94124e+06	C01251	ko00300,ko00620,ko01100,ko01110,ko01210,ko01230,ko01240	-	-	-	-	-	-	-	-	-	-	1.04364	0.187614	2.87503	1.52358	up	1.16882	0.102132	7.67565	2.94029	up
C26H32O11	Dehydrodiconiferyl alcohol-gamma'-O-glucoside	Lignans and Coumarins	Lignans	-	1	1.91483e+06	1.55536e+06	2.38378e+06	652892	645785	739094	474409	428561	423623	1.50966e+06	1.44807e+06	1.3698e+06	-	-	1.29307	0.000426481	3.26214	1.70582	up	-	-	-	-	-	1.2895	0.0239092	0.226614	-2.14169	down	1.23602	0.0320744	0.348101	-1.52242	down
C12H22O11	Galactinol	Others	Saccharides	3687-64-7	1	3.80165e+06	1.70691e+06	2.36481e+06	3.26863e+06	3.88854e+06	3.45148e+06	1.79824e+06	1.58584e+06	1.80447e+06	2.822e+06	2.74979e+06	2.5611e+06	C01235	ko00052,ko01100	-	-	-	-	-	1.20274	0.00480494	0.489087	-1.03184	down	-	-	-	-	-	-	-	-	-	-
C22H37NO3	N-(2-Hydroxyethyl)eicosapentaenoic acid	Lipids	Free fatty acids	-	3	9	9	9	93328.6	264041	135258	336161	445293	409403	42012.2	89638	177178	-	-	1.13094	0.00508946	0.259332	-1.94713	down	1.02618	0.0254369	2.41736	1.27343	up	1.30938	0.0064813	44105.8	15.4287	up	1.2674	0.0854865	18245.5	14.1553	up
C22H45O9P	LysoPG 16:0	Lipids	Glycerol ester	-	2	430672	468112	434683	272607	266124	276577	178312	168792	156144	241521	233436	251486	-	-	-	-	-	-	-	-	-	-	-	-	1.30366	0.000214876	0.377398	-1.40584	down	-	-	-	-	-
C5H15NO4P+	O-Phosphocholine	Alkaloids	Alkaloids	107-73-3	3	6.95821e+06	6.15929e+06	1.4162e+07	3.40696e+06	8.49575e+06	3.84139e+06	2.07272e+06	2.12875e+06	1.98752e+06	2.08403e+06	1.57942e+06	3.68769e+06	C00588	ko00564,ko01100	-	-	-	-	-	1.01308	0.189612	0.393099	-1.34704	down	1.22935	0.109826	0.226873	-2.14004	down	-	-	-	-	-
C18H40NO5P	Dihydrosphingosine-1-Phosphate	Lipids	Sphingolipids	19794-97-9	3	1783.89	3057.09	2044.96	5077.53	9313.18	4014.31	7462.08	9166	9185.49	3429.66	4741.73	5314.07	C01120	ko00600,ko01100	-	-	-	-	-	-	-	-	-	-	1.26451	0.00141607	3.74873	1.9064	up	1.07677	0.134341	2.67284	1.41837	up
C19H34O10	1-Octen-3-Ol-3-O-Beta-D-Xylopyranosyl(1→6)-Beta-D-Glucopyranoside	Others	Others	150995-11-2	1	290288	745975	574619	95698.1	88991.7	95699.2	152197	159954	191864	302213	249885	377711	C17614	-	-	-	-	-	-	-	-	-	-	-	1.16197	0.107735	0.312881	-1.67631	down	1.20308	0.0792122	0.174059	-2.52235	down
C5H7NO3	Pyroglutamic acid	Amino acids and derivatives	Amino acids and derivatives	4042-36-8	2	425408	537974	743003	4.2296e+06	5.25974e+06	5.32067e+06	1.7948e+06	1.72987e+06	1.80335e+06	3.07477e+06	3.1492e+06	3.78984e+06	-	-	-	-	-	-	-	1.21035	0.0120381	0.359758	-1.4749	down	1.2599	0.00394105	3.1224	1.64265	up	1.25129	0.00424254	8.67917	3.11756	up
C21H26O3	Acitretin	Others	Vitamin	55079-83-9	3	196151	1.50743e+06	185484	180052	158142	158048	1.06274e+06	1.19158e+06	1.06413e+06	347497	335320	388651	-	-	1.28998	0.00116186	0.322882	-1.63092	down	1.22144	0.00159468	6.68715	2.74139	up	-	-	-	-	-	-	-	-	-	-
C8H15NO6	N-Acetyl-D-glucosamine	Others	Saccharides	7512-17-6	3	205472	155226	232645	161908	136744	112237	95692	83234.9	87608.8	109680	89535.5	92100.1	C00140	ko00520,ko01100,ko01250,ko02010	-	-	-	-	-	-	-	-	-	-	1.24529	0.0377651	0.44921	-1.15454	down	-	-	-	-	-
C22H28O13	5-O-p-Coumaroylquinic acid O-glucoside	Phenolic acids	Phenolic acids	-	3	6105.51	21381.8	25711	47087	51400.1	61842.2	34406.5	21979.2	23740	8260.59	7180.26	8259.51	-	-	1.26006	0.039049	0.29579	-1.75735	down	1.11621	0.01063	0.499756	-1.0007	down	-	-	-	-	-	1.02472	0.0103932	3.01381	1.59159	up
C27H35N3O6	N',N''-Diferuloylspermidine	Alkaloids	Phenolamine	-	3	37755.8	49512.4	29011	142734	157492	167908	77292.1	87024	72106.4	79268.3	49029.8	98651.5	-	-	-	-	-	-	-	-	-	-	-	-	1.19401	0.00709167	2.03323	1.02378	up	1.24175	0.000301805	4.02595	2.00933	up
C18H19NO4	Sinosrewtine	Alkaloids	Alkaloids	-	3	22152.8	10060.8	26829.6	93358	100663	75833.3	80032.9	87157.4	72266.5	47806.2	77354.9	67715.6	-	-	-	-	-	-	-	-	-	-	-	-	1.21253	0.000886761	4.05562	2.01992	up	1.17727	0.00233307	4.57045	2.19234	up
C19H29N7O10	Asp-Gly-His-Ser-Thr	Amino acids and derivatives	Amino acids and derivatives	-	3	6.20308e+06	2.21333e+06	8311930	1.73349e+07	1.7666e+07	1.79624e+07	5.06836e+06	4.68618e+06	4.27652e+06	5.1203e+06	5.24905e+06	6.20385e+06	-	-	-	-	-	-	-	1.22089	2.62254e-06	0.26492	-1.91637	down	-	-	-	-	-	1.07029	0.0203365	3.16608	1.6627	up
C27H44O5	Spirostane-3,6,23-triol (Paniculogenin)	Steroids	Steroid	-	2	1.91299e+06	423231	2.70026e+06	2.3329e+06	2.27451e+06	1.96006e+06	760982	856601	734853	589622	488097	524934	-	-	-	-	-	-	-	1.21255	0.00365239	0.358196	-1.48118	down	-	-	-	-	-	-	-	-	-	-
C11H14O4	Methyl 3-(3-hydroxy-4-methoxyphenyl)propanoate	Phenolic acids	Phenolic acids	129150-61-4	3	297123	180435	358872	136126	157977	150733	108910	83695.1	81541	137691	150825	143583	-	-	-	-	-	-	-	-	-	-	-	-	1.20718	0.0660918	0.327757	-1.6093	down	-	-	-	-	-
C17H32N4O6	Leu-Lys-Glu	Amino acids and derivatives	Amino acids and derivatives	-	3	5.1545e+06	4.94652e+06	1.00784e+07	1.66217e+06	1.329e+06	1.83141e+06	9.96913e+06	1.04968e+07	9.03447e+06	6.47029e+06	6.75147e+06	7.07933e+06	-	-	-	-	-	-	-	1.21547	0.00107887	6.11714	2.61286	up	-	-	-	-	-	1.20019	0.0915337	0.238985	-2.06501	down
C22H26O14	p-Coumaroylquinic acid-4'-O-glucuronide	Phenolic acids	Phenolic acids	-	3	9497.46	25637.3	18210.8	320882	349778	335832	77380.7	241302	240879	174549	167460	187798	-	-	-	-	-	-	-	-	-	-	-	-	1.20585	0.0895404	10.4894	3.39086	up	1.2472	4.18187e-05	18.8674	4.23782	up
C24H25N3O6	Nap-Lys-OH	Amino acids and derivatives	Amino acids and derivatives	-	3	235402	225032	242931	2.59902e+06	2.21239e+06	2.60529e+06	2.25389e+06	1.88044e+06	1.71132e+06	2.07901e+06	2.4794e+06	1.5036e+06	-	-	-	-	-	-	-	-	-	-	-	-	1.30603	0.0085778	8.31099	3.05502	up	1.26809	0.00331304	10.5446	3.39843	up
C23H20O11	p-Coumaroylferuloyltartaric acid	Phenolic acids	Phenolic acids	-	3	128028	216090	190972	26236.1	19961	23929.6	61206.6	43012.9	56790.9	33776.5	69448.5	45952.2	-	-	-	-	-	-	-	1.16455	0.0221668	2.29599	1.19912	up	1.24862	0.0366194	0.300904	-1.73263	down	1.25061	0.0268984	0.131056	-2.93174	down
C35H52O14	Strophanthidin-3-O-glucosyl(1→4)digitoxoside (Erysimoside)	Steroids	Cardiac glycoside	7082-34-0	3	63697.2	76571.8	84352.2	38698.8	95151.2	61723.2	25171.6	26245.9	39709.6	48632.9	16050.4	13043.9	-	-	-	-	-	-	-	-	-	-	-	-	1.23294	0.00516113	0.405692	-1.30154	down	-	-	-	-	-
C9H11NO3	N-(2-Hydroxy-4-methoxyphenyl)acetamide	Alkaloids	Phenolamine	58469-06-0	2	3.86626e+06	2.45586e+06	2.78717e+06	2.18253e+07	2.60883e+07	2.74996e+07	4.37863e+06	4.69249e+06	4.77066e+06	7.16981e+06	8.95764e+06	1.02215e+07	-	-	-	-	-	-	-	1.21887	0.00662387	0.183546	-2.44579	down	-	-	-	-	-	1.25687	0.00395803	8.27871	3.04941	up
C14H16O10	3-Galloylquinic acid	Phenolic acids	Phenolic acids	17365-11-6	2	103934	61145.1	44172.9	48283.7	61503.5	294537	2791.7	26118.7	7216.64	36844.9	89929.8	30969.8	C10834	-	-	-	-	-	-	1.00399	0.264073	0.0893516	-3.48436	down	1.09225	0.0675387	0.172649	-2.53409	down	-	-	-	-	-
C13H20O3	Blumenol A	Others	Others	23526-45-6	2	390128	173408	764316	85242.6	75758.7	125961	133320	69765.4	121725	147489	100222	174773	-	-	-	-	-	-	-	-	-	-	-	-	1.04818	0.190921	0.244613	-2.03142	down	1.07007	0.181175	0.216111	-2.21016	down
C20H22O9	Poliothrysoside; Nigracin	Phenolic acids	Phenolic acids	18463-25-7	3	334854	155951	540662	154514	135954	157241	89418	93535.1	74012.4	66898.5	56158.1	54396.4	-	-	-	-	-	-	-	-	-	-	-	-	1.13122	0.145474	0.249126	-2.00505	down	-	-	-	-	-
C16H22O9	4-Hydroxyphenyl 6-O-(2-Methyl-3-Hydroxypropionyl)-Beta-D-Galactopyranoside	Phenolic acids	Phenolic acids	-	1	109301	98029.3	76201.1	349016	554518	515682	118049	165638	58897.7	124489	121722	326753	-	-	-	-	-	-	-	1.11765	0.0156206	0.24139	-2.05056	down	-	-	-	-	-	1.24094	0.0243928	5.0055	2.32352	up
C8H16NO9P	N-Acetyl-D-glucosamine-1-phosphate	Others	Saccharides	6866-69-9	3	236150	189274	133168	159014	153662	186774	70695.2	76690	18210.6	58188.7	73939.6	68733.2	C04256	-	-	-	-	-	-	-	-	-	-	-	1.05749	0.0276491	0.296452	-1.75413	down	-	-	-	-	-
C18H30N6O10	Asn-Thr-Gln-Glu	Amino acids and derivatives	Amino acids and derivatives	-	3	63263	38345	52173.8	203948	134231	203937	85256.1	113255	121509	130409	152392	110927	-	-	-	-	-	-	-	-	-	-	-	-	1.17786	0.0182693	2.081	1.05728	up	1.20803	0.022735	3.52523	1.81772	up
C6H5NO2	Isonicotinic acid	Others	Vitamin	55-22-1	2	2.14179e+06	2.56807e+06	2.48591e+06	9.37017e+06	9.22858e+06	9.7271e+06	7.67108e+06	7.80665e+06	9.46875e+06	1.17246e+07	1.28359e+07	1.34879e+07	C07446	-	-	-	-	-	-	-	-	-	-	-	1.29553	0.00708473	3.46683	1.79362	up	1.26537	4.33062e-06	3.93646	1.9769	up
C13H21N3O7	Thr-Pro-Asp	Amino acids and derivatives	Amino acids and derivatives	-	3	1.36733e+06	784154	534740	2.28152e+07	2.28205e+07	2.35451e+07	1.12106e+07	1.29871e+07	1.09587e+07	9.86655e+06	9.09662e+06	1.05218e+07	-	-	-	-	-	-	-	-	-	-	-	-	1.28317	0.00121322	13.0877	3.71014	up	1.2549	3.5653e-07	25.754	4.68672	up
C27H52NO7P	LysoPC 19:2(2n isomer)	Lipids	LPC	-	3	42624.7	32356.3	51409.6	45800.1	42095.6	41039.7	19111.5	19564.9	20179.1	42615.8	40303.8	54479.7	-	-	1.26549	0.0264999	2.33452	1.22313	up	1.21814	0.00270769	0.456473	-1.1314	down	1.23037	0.0545105	0.465663	-1.10264	down	-	-	-	-	-
C17H27N3O17P2	Uridine 5'-diphospho-N-acetylglucosamine	Nucleotides and derivatives	Nucleotides and derivatives	528-04-1	1	515655	349191	380199	575505	668321	670990	190825	255974	217285	283937	323641	331067	C00043	ko00520,ko00524,ko01100,ko01250	-	-	-	-	-	1.20313	0.000949157	0.346813	-1.52777	down	-	-	-	-	-	-	-	-	-	-
C29H46N6O9	Leu-Ile-Tyr-Thr-Asn	Amino acids and derivatives	Amino acids and derivatives	-	3	2968.98	8910.96	9044.82	38624.9	120897	105949	171720	130337	68014.4	53891.1	37269.3	13874.3	-	-	1.04491	0.0845978	0.283823	-1.81694	down	-	-	-	-	-	1.24763	0.0603883	17.6858	4.14452	up	1.17539	0.0834371	12.6869	3.66527	up
C19H30N6O5	Arg-Phe-Thr	Amino acids and derivatives	Amino acids and derivatives	-	3	329976	692971	928805	592326	498469	611005	5.86774e+06	5.31029e+06	5.53006e+06	388988	315988	322573	-	-	1.29504	0.000777936	0.0615001	-4.02327	down	1.22152	0.000664046	9.81789	3.29541	up	1.25992	3.36604e-05	8.56056	3.09771	up	-	-	-	-	-
C24H22N2O6	Phe-HoPhe-OH	Amino acids and derivatives	Amino acids and derivatives	-	3	303584	262340	268073	3.86846e+06	3.27495e+06	3.58283e+06	40690.1	3.28062e+06	3.06654e+06	3.03849e+06	3.17651e+06	3.42765e+06	-	-	-	-	-	-	-	-	-	-	-	-	-	-	-	-	-	1.26835	0.00256782	12.8612	3.68496	up
C21H22O11	Eriodictyol-8-C-glucoside	Flavonoids	Flavanones	1023271-51-3	3	34518.1	106037	62050.9	336137	360386	397655	129529	146848	122530	389634	381944	369548	-	-	1.28973	1.71415e-05	2.86063	1.51633	up	1.21192	0.00224976	0.364572	-1.45572	down	-	-	-	-	-	1.19384	0.000465382	5.40052	2.4331	up
C10H13N4O8P	Inosine 5'-monophosphate	Nucleotides and derivatives	Nucleotides and derivatives	131-99-7	3	261037	218615	286447	207102	229213	215647	735873	951445	1.07543e+06	1.51562e+06	1.47805e+06	1.59689e+06	C00130	ko00230,ko01100,ko01110,ko01232,ko01240	-	-	-	-	-	1.20916	0.0189542	4.23759	2.08324	up	1.2799	0.0183267	3.60625	1.8505	up	-	-	-	-	-
C22H18O11	p-Coumaroylcaffeoyltartaric acid	Phenolic acids	Phenolic acids	-	3	71417.8	74637.3	87480.8	83933.1	79308.8	83501.7	32114.9	31592.8	31006.2	15352	30010	49466.9	-	-	-	-	-	-	-	1.22279	0.000519726	0.383855	-1.38137	down	1.29772	0.0108039	0.405564	-1.302	down	-	-	-	-	-
C21H22O13	Dihydromyricetin-3-O-glucoside	Flavonoids	Flavanonols	-	3	20855.6	22182.2	26532.4	165460	199501	194799	40010	185082	169272	173661	169074	165045	-	-	-	-	-	-	-	-	-	-	-	-	1.09411	0.142399	5.66858	2.50299	up	1.26377	0.00349995	8.04598	3.00827	up
C9H12N2O6	β-Pseudouridine	Nucleotides and derivatives	Nucleotides and derivatives	1445-07-4	3	179626	186171	212300	89009	23266.3	36086.3	78626.4	89717.4	54709.4	114413	137118	127775	C02067	ko00240,ko01100	-	-	-	-	-	-	-	-	-	-	1.24652	0.00118931	0.385841	-1.37392	down	1.12471	0.00839254	0.256638	-1.96219	down
C15H16O10	Sinapoyltartaric acid	Phenolic acids	Phenolic acids	-	3	40816.1	14814	39596.8	216764	169890	222960	240596	254251	214288	134394	119538	150923	-	-	-	-	-	-	-	-	-	-	-	-	1.24928	0.000258695	7.44679	2.89662	up	1.19313	0.00292661	6.40169	2.67845	up
C9H18N2O3	L-Alanyl-L-leucine	Amino acids and derivatives	Amino acids and derivatives	3303-34-2	3	206995	239234	221528	52973.7	82374.9	74852.5	82596	61414	86041.8	73845.1	69151.2	85539.5	-	-	-	-	-	-	-	-	-	-	-	-	1.2813	0.000329826	0.344514	-1.53737	down	1.23493	0.000291973	0.314787	-1.66755	down
C10H7NO4	4,8-Dihydroxyquinoline-2-carboxylic acid	Organic acids	Organic acids	59-00-7	3	65433.7	65355.5	59063.6	1.12419e+06	1.33877e+06	1.28826e+06	530866	648866	581222	453982	472536	489321	C02470	ko00380	-	-	-	-	-	1.19818	0.002717	0.469435	-1.091	down	1.30708	0.00411749	9.27537	3.2134	up	1.26915	0.00293859	19.7586	4.30441	up
C17H25N3O5S1	Ser-Phe-Met	Amino acids and derivatives	Amino acids and derivatives	-	3	193076	97244.6	99804.1	1.29661e+06	1.38384e+06	1.37255e+06	632601	632743	700942	1.177e+06	848186	1.02303e+06	-	-	-	-	-	-	-	1.21572	5.1899e-05	0.485144	-1.04351	down	1.26612	0.000305456	5.04014	2.33346	up	1.24857	9.72032e-06	10.389	3.37698	up
C15H24N2O17P2	Uridine 5'-diphospho-D-glucose	Nucleotides and derivatives	Nucleotides and derivatives	133-89-1	1	1.53657e+07	1.05994e+07	1.00838e+07	1.09024e+07	1.45942e+07	1.40453e+07	5.89998e+06	6.42643e+06	5.87462e+06	1.2941e+07	1.02035e+07	1.05696e+07	C00029	ko00040,ko00052,ko00053,ko00500,ko00520,ko00524,ko00561,ko00908,ko01100,ko01110,ko01240,ko01250	-	-	-	-	-	1.18758	0.0229325	0.460298	-1.11936	down	-	-	-	-	-	-	-	-	-	-
C16H33NO	palmitic amide	Others	Others	-	1	935908	752480	657784	595688	568328	459703	643996	597991	594033	1.89639e+06	1.88156e+06	1.78776e+06	-	-	1.29475	9.05318e-05	3.0314	1.59998	up	-	-	-	-	-	-	-	-	-	-	-	-	-	-	-
C9H9NO5	6-Hydroxydopaquinone	Amino acids and derivatives	Amino acids and derivatives	135791-48-9	3	166501	148869	117969	244877	240706	205917	204115	203526	200840	603226	620265	490689	-	-	1.28372	0.0119085	2.81715	1.49423	up	-	-	-	-	-	-	-	-	-	-	-	-	-	-	-
C11H19NO9	N-Acetylneuraminic acid	Amino acids and derivatives	Amino acids and derivatives	131-48-6	3	158052	90450.8	151188	65545.5	73230.9	80269.5	76759.3	64560.3	52845.2	96709.3	99352	107668	C00270	ko00520,ko01100,ko01250	-	-	-	-	-	-	-	-	-	-	1.12134	0.0741991	0.485788	-1.0416	down	-	-	-	-	-
C10H19N3O4	Asn-Ile	Amino acids and derivatives	Amino acids and derivatives	438533-59-6	3	171936	239578	168814	93604.2	97285.3	90098	127060	104807	93054.7	176775	165332	171209	-	-	-	-	-	-	-	-	-	-	-	-	-	-	-	-	-	1.20333	0.0485459	0.484188	-1.04636	down
C25H22O11	Dicaffeoylshikimic acid	Phenolic acids	Phenolic acids	-	1	3.13671e+06	1.9038e+06	6.42242e+06	22159220	1.00254e+07	1.84604e+07	1.20327e+06	3.34136e+06	3.54283e+06	7.08254e+06	7.21763e+06	5.2491e+06	-	-	1.03921	0.018553	2.41723	1.27336	up	1.11411	0.0531495	0.159689	-2.64666	down	-	-	-	-	-	1.10683	0.0538438	4.41816	2.14344	up
C11H18N4O7	Asn-Ala-Asp	Amino acids and derivatives	Amino acids and derivatives	-	3	292122	180864	157882	1.83217e+06	1.78385e+06	1.86234e+06	936221	942861	869940	762506	745227	531463	-	-	-	-	-	-	-	-	-	-	-	-	1.27278	0.000508975	4.35752	2.12351	up	1.25318	4.11035e-05	8.68385	3.11833	up
C3H7NO2	L-Alanine	Amino acids and derivatives	Amino acids and derivatives	56-41-7	3	32098	26294.3	21683	53949.3	54389.4	60185.1	45912.7	43831.8	44683.5	68202.6	50433.2	50099	C00041	ko00250,ko00270,ko00430,ko00450,ko00470,ko00710,ko00970,ko01100,ko01110,ko01200,ko01230,ko02010,ko04122	-	-	-	-	-	-	-	-	-	-	-	-	-	-	-	1.21496	0.0021848	2.10456	1.07352	up
C20H24O6	(7'S,8R,8'R)-3,5'-dimethoxy-3',4,9'-trihydroxy-7',9-epoxy-8,8'-lignan	Lignans and Coumarins	Lignans	-	2	139390	307429	122508	116024	128136	123591	89224.1	77536.9	76316.5	182973	190769	164725	-	-	1.27931	0.00138807	2.21521	1.14744	up	-	-	-	-	-	1.04417	0.206254	0.426956	-1.22784	down	-	-	-	-	-
C11H15N5O5	N7-Methylguanosine	Nucleotides and derivatives	Nucleotides and derivatives	20244-86-4	3	297887	351983	405144	139011	178066	183937	136786	143973	192158	200739	193483	180817	C20674	-	-	-	-	-	-	-	-	-	-	-	1.24139	0.0106207	0.448256	-1.1576	down	1.20656	0.0147037	0.474888	-1.07434	down
C21H20O11	Kaempferol-7-O-glucoside*	Flavonoids	Flavonols	16290-07-6	3	84904.9	87273.9	94079.2	33340	43345	25575	16675	13288.4	32879.7	56246.6	15221.2	45679.7	-	-	-	-	-	-	-	-	-	-	-	-	1.23293	0.00270741	0.236023	-2.083	down	1.21118	0.00238173	0.384064	-1.38058	down
C6H12O5	1,5-Anhydro-D-glucitol	Others	Saccharides	154-58-5	3	246152	122162	208704	305879	323861	327109	139979	144171	138118	243606	234438	247985	C07326	-	-	-	-	-	-	1.22178	0.000694642	0.44131	-1.18014	down	-	-	-	-	-	-	-	-	-	-
C26H46N10O11	Glu-Gln-Lys-Asp-Arg	Amino acids and derivatives	Amino acids and derivatives	-	3	6670	10005	7613.71	223396	309772	293481	215691	156734	252559	39340.7	53912.2	56451.4	-	-	1.25737	0.0261619	0.239533	-2.0617	down	-	-	-	-	-	1.30072	0.0187703	25.7315	4.68546	up	1.26549	0.00959614	34.0343	5.08892	up
C22H18O11	Caffeoyl-p-coumaroyltartaric acid	Phenolic acids	Phenolic acids	-	3	37994.1	36527	28937	8542.27	19450.7	3327.38	9954.76	10439.5	12343.2	9954.76	23340	13266.5	-	-	-	-	-	-	-	-	-	-	-	-	1.28726	0.0100865	0.316432	-1.66003	down	1.02666	0.0189667	0.302735	-1.72387	down
C8H16O6	Dambonitol	Others	Saccharides	523-94-4	3	591159	525520	752752	443895	398975	402313	274089	265579	241484	497747	531693	576708	-	-	1.28069	0.0024952	2.05613	1.03993	up	-	-	-	-	-	1.2669	0.0307436	0.417856	-1.25892	down	-	-	-	-	-
C16H25N3O2	p-Coumaroylspermidine	Alkaloids	Phenolamine	-	3	244811	170447	471922	149630	203729	177842	50099.5	129560	127257	121996	129826	153775	-	-	-	-	-	-	-	-	-	-	-	-	1.01592	0.158562	0.345947	-1.53138	down	-	-	-	-	-
C24H26O14	Limocitrol 3-Glucoside	Flavonoids	Flavones	-	2	768740	1.26426e+06	427293	6.52765e+06	6.17943e+06	7.92896e+06	1.51466e+06	1.61954e+06	1.64071e+06	765072	888395	820701	-	-	-	-	-	-	-	1.21633	0.00977696	0.231387	-2.11162	down	-	-	-	-	-	1.22412	0.00263631	8.38765	3.06827	up
C23H43N7O9	Glu-Lys-Ala-Lys-Ser	Amino acids and derivatives	Amino acids and derivatives	-	3	2.47485e+06	1.90084e+06	2.66676e+06	923468	547710	729755	130917	159971	124864	280944	296060	226038	-	-	-	-	-	-	-	1.1992	0.0306093	0.188898	-2.40432	down	1.30406	0.0105474	0.0590353	-4.08228	down	1.21503	0.00924725	0.312524	-1.67796	down
C6H6N4O2	3-Methylxanthine	Nucleotides and derivatives	Nucleotides and derivatives	1076-22-8	3	140022	72065.1	87427.7	4.07771e+06	4.10683e+06	4.10271e+06	1.85395e+06	2.02426e+06	1.96886e+06	1.31087e+06	1.3102e+06	1.30263e+06	C16357	ko00232,ko01100,ko01110	-	-	-	-	-	1.22062	0.000376381	0.475865	-1.07138	down	1.29951	0.000138774	19.5218	4.28701	up	1.26285	1.13651e-06	41.0238	5.35839	up
C9H18N2O4	L-Seryl-L-Isoleucine	Amino acids and derivatives	Amino acids and derivatives	91086-51-0	3	322440	482316	341192	136128	159234	156128	299340	286416	278922	387234	411462	431932	-	-	-	-	-	-	-	-	-	-	-	-	-	-	-	-	-	1.21526	0.0419196	0.393988	-1.34378	down
C13H18O7	Helicidol	Phenolic acids	Phenolic acids	106982-96-1	3	128333	106785	65058	83482.2	80259.9	312538	27886.5	43132.2	38600.4	214112	209641	198761	-	-	1.2823	1.1822e-05	5.67888	2.50561	up	-	-	-	-	-	1.17537	0.0684975	0.365183	-1.45331	down	-	-	-	-	-
C27H30O16	Quercetin-7-O-rutinoside*	Flavonoids	Flavonols	147714-62-3	3	329103	759554	884120	73506.2	97384.9	156489	567015	652431	470668	67304.2	60569.2	132567	-	-	1.25108	0.00508387	0.154096	-2.6981	down	1.17616	0.00524721	5.16253	2.36808	up	-	-	-	-	-	1.1694	0.0795245	0.165949	-2.59119	down
C18H32O16	Raffinose	Others	Saccharides	512-69-6	3	1.50477e+07	3.49271e+06	6.79867e+06	1.84417e+07	1.75742e+07	1.6431e+07	8.4294e+06	8.11803e+06	7.38229e+06	8.23172e+06	9.12136e+06	8.15125e+06	C00492	ko00052,ko01100,ko02010	-	-	-	-	-	1.2141	0.000661371	0.456266	-1.13205	down	-	-	-	-	-	-	-	-	-	-
C20H20O6	balanophonin	Others	Others	215319-47-4	3	1.8295e+06	2.33921e+06	1.89393e+06	1.90011e+06	1.93367e+06	2.2788e+06	644605	590919	594299	1.38422e+06	1.0227e+06	1.57032e+06	-	-	1.22723	0.0454683	2.17357	1.12006	up	1.21704	0.00625503	0.299353	-1.74008	down	1.29815	0.0119138	0.30182	-1.72824	down	-	-	-	-	-
C24H22O14	Kaempferol-3-O-(6''-malonyl)glucoside*	Flavonoids	Flavonols	-	3	8655.71	66415.4	53720.5	1.60291e+06	1.47877e+06	1.07575e+06	429170	625203	43209.9	48441.6	36567.6	45911.5	-	-	-	-	-	-	-	-	-	-	-	-	-	-	-	-	-	1.19857	0.0129449	32.2803	5.01258	up
C10H12O4	Ethyl Vanillate	Phenolic acids	Phenolic acids	617-05-0	3	151794	181938	149840	82016.1	86903.4	41389.7	48582.2	47674.8	64020.2	59352.9	54432	59864.4	-	-	-	-	-	-	-	-	-	-	-	-	1.28398	0.00277044	0.331445	-1.59316	down	1.1058	0.00885385	0.434908	-1.20122	down
C20H32N6O12S2	Oxiglutatione	Amino acids and derivatives	Amino acids and derivatives	27025-41-8	3	3.0326e+06	2.1637e+06	2.98448e+06	4.37046e+06	5.54713e+06	5.55645e+06	1.6501e+06	1.90839e+06	1.86557e+06	4.62104e+06	5.07355e+06	5.1272e+06	C00127	ko00480,ko01100,ko01240	1.2888	0.000465399	2.7326	1.45027	up	1.20506	0.0110668	0.350526	-1.51241	down	-	-	-	-	-	-	-	-	-	-
C28H38O18	1-O-rhamnose-3-O-glucoside-Caffeoyl Quinic Acid	Phenolic acids	Phenolic acids	-	2	70577.4	66370.7	60500.2	252548	295499	298480	117089	187230	96712.7	179836	149288	119475	-	-	-	-	-	-	-	1.08834	0.0165546	0.473738	-1.07784	down	1.12302	0.130161	2.03107	1.02224	up	1.26476	0.00356323	4.28734	2.10008	up
C20H24O7	Olivil	Lignans and Coumarins	Lignans	2955-23-9	3	66816.8	77365.5	96544.4	27011	25184.5	16469.4	82893	73614.1	85636.9	59044.9	64776.3	51734.6	-	-	-	-	-	-	-	1.187	0.000311211	3.52646	1.81822	up	-	-	-	-	-	1.21917	0.0135584	0.28524	-1.80975	down
C13H12O8	Cis-Coutaric acid	Phenolic acids	Phenolic acids	67920-37-0	3	449074	422137	404053	229708	145989	90714.2	10489.5	44999.4	26632.1	15155	10489.5	26445.4	-	-	-	-	-	-	-	1.07135	0.0790765	0.17607	-2.50578	down	1.2579	3.03345e-05	0.0643953	-3.9569	down	1.13345	0.0146895	0.365737	-1.45112	down
C14H20N2O3S	Met-Phe	Amino acids and derivatives	Amino acids and derivatives	14492-14-9	3	42671.6	58534.2	38521.4	21675	26675	13499.2	20005	14204.5	18738.1	26423	15917.9	21106.2	-	-	-	-	-	-	-	-	-	-	-	-	1.24036	0.0334251	0.378936	-1.39997	down	1.09979	0.0302904	0.442642	-1.17579	down
C27H30O15	Kaempferol-3-O-rutinoside(Nicotiflorin)	Flavonoids	Flavonols	17650-84-9	3	440212	532718	916633	37411.6	28437.1	67864.5	32017.4	35319.6	33690.4	54294.5	54917.7	47074	C21833	ko00944,ko01110	-	-	-	-	-	-	-	-	-	-	1.29529	0.0549593	0.0534661	-4.22523	down	1.23366	0.05596	0.0707641	-3.82084	down
C14H16O8	5-O-β-D-Glucopyranosyl-3-hydrobenzo(b)fu-ran-2-one	Phenolic acids	Phenolic acids	-	2	1.24806e+06	1.28757e+06	1.80474e+06	2.95079e+06	2.94306e+06	3.11139e+06	2.21766e+06	2.38967e+06	2.26003e+06	2.50169e+06	2.40494e+06	2.55418e+06	-	-	-	-	-	-	-	-	-	-	-	-	-	-	-	-	-	1.20399	0.00836945	2.07476	1.05294	up
C9H11NO3	L-Tyrosine	Amino acids and derivatives	Amino acids and derivatives	60-18-4	1	920120	706954	702315	5.93287e+06	6.09262e+06	6.8744e+06	1.15347e+06	1.32533e+06	1.54231e+06	2.2342e+06	2.47951e+06	2.81502e+06	C00082	ko00130,ko00261,ko00350,ko00360,ko00400,ko00460,ko00730,ko00940,ko00950,ko00965,ko00966,ko00970,ko00999,ko01100,ko01110,ko01210,ko01230,ko01240	-	-	-	-	-	1.21385	0.00119506	0.212758	-2.23271	down	-	-	-	-	-	1.26452	0.0017046	8.11366	3.02035	up
C20H31NO13	Pyridoxine-5'-O-diglucoside	Others	Vitamin	-	3	19642.8	41839.5	16779	382059	460114	459762	230002	255088	107398	188029	186162	185260	-	-	-	-	-	-	-	1.0267	0.0181214	0.455083	-1.1358	down	1.22174	0.0601921	7.57064	2.92041	up	1.24822	0.00209572	16.6357	4.05621	up
C15H18O9	Grevilloside Q	Others	Ketone compounds	1708967-64-9	2	724525	384812	542317	501262	451209	604982	44641.7	106112	133191	209227	197526	384522	-	-	1.04472	0.0911717	2.78672	1.47857	up	1.14049	0.00306107	0.182313	-2.45551	down	1.20948	0.035968	0.171915	-2.54023	down	-	-	-	-	-
C12H14O5	Methyl sinapate	Phenolic acids	Phenolic acids	20733-94-2	3	10388.3	1876.39	4772.86	10166.7	10972.7	11949	4872.3	2552.74	2313.49	3738.26	6211.52	5165.27	-	-	-	-	-	-	-	1.14868	0.00255229	0.294319	-1.76455	down	-	-	-	-	-	-	-	-	-	-
C14H22N2O16P2	Uridine-5'-Diphosphate-D-Xylose	Nucleotides and derivatives	Nucleotides and derivatives	3616-06-6	1	2.68196e+06	1.92367e+06	1.99185e+06	1.84363e+06	2.39768e+06	2.07146e+06	881864	1.12729e+06	1.07393e+06	1.94312e+06	1.81944e+06	1.69695e+06	C00190	ko00520,ko00908,ko01100,ko01250	-	-	-	-	-	1.1721	0.0106618	0.488388	-1.0339	down	1.23734	0.031208	0.467311	-1.09754	down	-	-	-	-	-
C14H12O3	Benzyl salicylate	Phenolic acids	Phenolic acids	118-58-1	3	741112	249130	543465	674657	688396	692082	200064	251254	367881	378715	364736	460821	-	-	-	-	-	-	-	1.14363	0.0134437	0.398611	-1.32695	down	-	-	-	-	-	-	-	-	-	-
C13H21N3O6S1	Pro-Cys-Glu	Amino acids and derivatives	Amino acids and derivatives	-	3	466510	427549	554739	1.03208e+06	848594	857278	1.31975e+06	941682	1.05384e+06	843980	676507	754697	-	-	-	-	-	-	-	-	-	-	-	-	1.25427	0.0219367	2.28829	1.19427	up	-	-	-	-	-
C22H22O12	Rhamnetin-3-O-Glucoside*	Flavonoids	Flavonols	27875-34-9	3	182430	157001	205994	185349	159000	150868	225245	460215	311545	146745	132017	81243.1	-	-	1.13748	0.0805672	0.361087	-1.46958	down	1.0253	0.132026	2.01326	1.00954	up	-	-	-	-	-	-	-	-	-	-
C10H12N4O5	Inosine	Nucleotides and derivatives	Nucleotides and derivatives	58-63-9	3	143571	188116	33770.6	21675	30972.2	47452.9	59640.6	43021.1	38770.5	122403	110770	113491	C00294	ko00230,ko01100,ko01232,ko02010	1.24505	0.00218165	2.4511	1.29343	up	-	-	-	-	-	-	-	-	-	-	-	-	-	-	-
C23H24O13	Limocitrin-3-O-galactoside	Flavonoids	Flavonols	-	3	2.43762e+06	2.05127e+06	1.57013e+06	1.18299e+06	1.40754e+06	1.09361e+06	683816	494735	426245	317857	345660	234684	-	-	-	-	-	-	-	1.14827	0.00512821	0.435595	-1.19894	down	1.2574	0.0199702	0.26486	-1.9167	down	-	-	-	-	-
C22H26O8	Olivil Monoacetate	Lignans and Coumarins	Lignans	-	3	74282.6	53350	47176	154931	190548	85583.4	190356	233068	185447	139078	113895	99718.9	-	-	-	-	-	-	-	-	-	-	-	-	1.274	0.00317904	3.48307	1.80036	up	1.07483	0.100676	2.46591	1.30212	up
C26H32O11	Matairesinol-4'-O-glucoside (Matairesinoside)	Lignans and Coumarins	Lignans	23202-85-9	1	1.95853e+06	1.38253e+06	2.17626e+06	494788	601157	625117	440026	416592	215165	1.42072e+06	1.29059e+06	1.09049e+06	-	-	1.21618	0.00219798	3.54717	1.82667	up	-	-	-	-	-	1.24537	0.0177916	0.194258	-2.36396	down	1.23024	0.0303189	0.311938	-1.68067	down
C15H22N6O5S	S-(5'-Adenosyl)-L-methionine	Amino acids and derivatives	Amino acids and derivatives	29908-03-0	1	838567	528382	813917	308688	359507	343340	284422	385669	429326	526833	575923	568048	C00019	ko00261,ko00270,ko00330,ko00908,ko00999,ko01100,ko01110,ko01230,ko01240,ko04122	-	-	-	-	-	-	-	-	-	-	-	-	-	-	-	1.17736	0.0565054	0.463822	-1.10836	down
C22H35N5O6	Ala-Phe-Thr-Lys	Amino acids and derivatives	Amino acids and derivatives	-	3	1.46586e+06	1.21219e+06	870987	4.27392e+06	4.2441e+06	4.9755e+06	720861	776385	497675	855698	1.10397e+06	767705	-	-	-	-	-	-	-	1.21087	0.00160476	0.147843	-2.75786	down	-	-	-	-	-	1.23864	0.000588926	3.80202	1.92677	up
C21H35N9O7	His-Val-Arg-Asp	Amino acids and derivatives	Amino acids and derivatives	-	3	181962	104210	164632	464654	530123	564850	462383	484109	568616	332107	360339	275442	-	-	-	-	-	-	-	-	-	-	-	-	1.25755	0.00134595	3.36091	1.74885	up	1.2179	0.000756177	3.45966	1.79063	up
C13H16O7	Helicide	Phenolic acids	Phenolic acids	80154-34-3	3	42085.5	28340	44429.3	176422	162565	182639	125142	124417	137040	109983	129605	123582	-	-	-	-	-	-	-	-	-	-	-	-	1.27586	0.00019386	3.36598	1.75103	up	1.24483	7.67665e-05	4.54162	2.18321	up
C9H11NO3	3-Hydroxy-L-phenylalanine	Amino acids and derivatives	Amino acids and derivatives	587-33-7	1	993776	683176	792117	5.91618e+06	7.63022e+06	7.49366e+06	1.21316e+06	1.32066e+06	1.33505e+06	2.14678e+06	2.35744e+06	2.73035e+06	-	-	-	-	-	-	-	1.21711	0.00885257	0.183881	-2.44315	down	-	-	-	-	-	1.25934	0.00661679	8.52145	3.0911	up
C14H20NO4+	Caffeoylcholine	Alkaloids	Phenolamine	87189-10-4	3	392534	184486	270538	194177	197010	74191.6	58607.4	56794.4	68023.5	178121	57612.4	143968	-	-	-	-	-	-	-	-	-	-	-	-	1.25106	0.0664846	0.216416	-2.20812	down	-	-	-	-	-
C52H80O24	Medicagenic acid-3-O-glucuronide-28-O-xylosyl(1,4)-rhamnosyl(1,2)-arabinoside	Terpenoids	Triterpene Saponin	128192-15-4	2	687863	125052	306007	592087	591491	652739	974198	1.2193e+06	923627	126337	195001	575923	-	-	1.09614	0.0159139	0.287849	-1.79662	down	-	-	-	-	-	1.02628	0.0368188	2.78583	1.47811	up	-	-	-	-	-
C6H9NOS	4-Methyl-5-thiazoleethanol	Others	Others	137-00-8	3	102202	60743.5	74255.5	337676	250793	352459	397839	278368	83936.1	153657	125288	117615	C04294	ko00730,ko01100,ko01240	-	-	-	-	-	-	-	-	-	-	-	-	-	-	-	1.22636	0.00995702	3.9668	1.98798	up
C19H24O10	4-(Trans)-acetul-3,6,8-trihydroxy-3-methyl-dihydronapht halenone glucoside	Others	Chromone	-	2	74216.8	89036.8	34690.4	136350	135486	125900	78878.1	74764.2	82676.6	54470.9	41680	55015	-	-	-	-	-	-	-	-	-	-	-	-	-	-	-	-	-	1.02658	0.0493612	2.00933	1.00672	up
C7H12O4	2-Propylsuccinic acid*	Organic acids	Organic acids	618-57-5	3	45752	104044	68696.1	5988.02	16742	31763.4	31074.1	26584.5	23612.8	43610.1	42330.8	36113.6	C16657	-	-	-	-	-	-	-	-	-	-	-	1.15933	0.112024	0.371964	-1.42676	down	1.03979	0.0668496	0.249407	-2.00343	down
C19H28O11	Benzyl-β-gentiobioside	Phenolic acids	Phenolic acids	56775-64-5	3	23660.2	19572.6	10849.8	163119	192643	173720	51046.9	33348.4	52383.4	33370.7	8036.15	25239.2	-	-	-	-	-	-	-	1.19327	0.000440043	0.258325	-1.95274	down	1.13714	0.0261611	2.52907	1.33861	up	1.2469	0.000762782	9.79024	3.29134	up
C21H38O4	10,12-Octadecadienoic acid,2,3-dihydroxypropyl ester,(10E,12Z)-	Lipids	Free fatty acids	1908475-46-6	1	262734	204440	162615	112005	96634.4	90070.4	86446.5	99641.5	83823	224058	228677	250859	-	-	1.28558	0.00040977	2.60676	1.38226	up	-	-	-	-	-	1.23121	0.0503314	0.428573	-1.22239	down	1.16733	0.0565808	0.474301	-1.07612	down
C21H22O12	Taxifolin-3'-O-glucoside	Flavonoids	Flavanonols	31106-05-5	3	21664.6	39469.1	6597.3	93600.2	76788.2	89664	110393	120046	87652	126469	114304	121988	-	-	-	-	-	-	-	-	-	-	-	-	1.12236	0.00348809	4.69638	2.23155	up	1.06514	0.0090002	3.83949	1.94091	up
C21H22O10	Dunalianoside A	Phenolic acids	Phenolic acids	-	3	391760	225992	273499	89326.9	73844.2	88387.5	30857.8	33131.5	40335.8	41189.5	40220.1	45866.8	-	-	-	-	-	-	-	1.19141	0.00273861	0.414715	-1.26981	down	1.2901	0.0331628	0.117055	-3.09475	down	1.22412	0.0481737	0.282253	-1.82494	down
C21H22O10	Butin-7-O-glucoside	Flavonoids	Flavanones	-	3	391760	225992	273499	89326.9	73844.2	88387.5	30857.8	33131.5	40335.8	41189.5	40220.1	45866.8	-	-	-	-	-	-	-	1.19141	0.00273861	0.414715	-1.26981	down	1.2901	0.0331628	0.117055	-3.09475	down	1.22412	0.0481737	0.282253	-1.82494	down
C7H8O5	3-Dehydroshikimic acid	Organic acids	Organic acids	2922-42-1	3	85630.3	46453.1	82792.6	36113.7	44202.8	37082.6	8671.13	32707.3	34070.7	73183.4	76337.9	61233.4	C02637	ko00400,ko00999,ko01100,ko01110,ko01230,ko01240	1.03033	0.015785	2.79333	1.48199	up	-	-	-	-	-	1.00681	0.0448912	0.351129	-1.50993	down	-	-	-	-	-
C27H30O14	Vitexin-2''-O-rhamnoside	Flavonoids	Flavones	64820-99-1	3	41490.6	41972.2	104044	17712.4	30010	40010	19371.4	29730.4	26675	21686.4	38345	11670	C12628	ko00944	-	-	-	-	-	-	-	-	-	-	1.02398	0.212813	0.404127	-1.30712	down	-	-	-	-	-
C13H12O9	2-Caffeoyl-L-tartaric acid (Caftaric acid)	Phenolic acids	Phenolic acids	67879-58-7	3	6106.59	8889.37	10073.7	105403	94612	182797	45417.3	35231.8	33807.6	25875.8	35736.2	14527.7	-	-	-	-	-	-	-	1.14399	0.0819335	0.298989	-1.74183	down	1.27521	0.00927518	4.56555	2.19079	up	1.24717	0.0499558	15.2699	3.93262	up
C18H32O4	9-Hydroxy-12-oxo-15(Z)-octadecenoic acid	Lipids	Free fatty acids	-	3	386594	515459	382172	276025	259646	272123	230433	161881	223486	298085	300758	286482	C21924	ko00592,ko01110	-	-	-	-	-	-	-	-	-	-	1.21433	0.0206905	0.479511	-1.06036	down	-	-	-	-	-
C21H24N6O6	His-Asp-Trp	Amino acids and derivatives	Amino acids and derivatives	-	3	27368.5	24923.3	17724.5	178000	244149	239611	127965	175138	127013	192598	166564	193056	-	-	-	-	-	-	-	-	-	-	-	-	1.28795	0.0147073	6.14307	2.61896	up	1.25786	0.0104275	9.4515	3.24054	up
C13H21N3O8	Glu-Glu-Ala	Amino acids and derivatives	Amino acids and derivatives	-	3	1.60908e+06	1.20892e+06	996997	8.24184e+06	8.30722e+06	3.02183e+06	3.69964e+06	4.50544e+06	3.88814e+06	3.30936e+06	1.18894e+06	2056415	-	-	-	-	-	-	-	-	-	-	-	-	1.26942	0.0011729	3.16992	1.66445	up	1.153	0.0939882	5.12999	2.35896	up
C24H42N10O11	Glu-Ser-Gln-Arg-Gln	Amino acids and derivatives	Amino acids and derivatives	-	3	89114.4	38867.6	131774	971136	1.16867e+06	1.29039e+06	1.47662e+06	1.08977e+06	918926	626635	727497	779211	-	-	-	-	-	-	-	-	-	-	-	-	1.26061	0.0204742	13.4177	3.74606	up	1.22022	0.0047209	13.2055	3.72307	up
C12H16O4	1-(2,4,5-Trimethoxyphenyl)propan-1-one	Phenolic acids	Phenolic acids	3904-18-5	3	52482	25005	28340	115565	178404	148393	167073	98109.5	107564	111263	73457.2	68477.8	-	-	-	-	-	-	-	-	-	-	-	-	1.20402	0.0395983	3.52222	1.81649	up	1.19654	0.0128281	4.18006	2.06352	up
C10H20N2O3S2	Met-Met	Amino acids and derivatives	Amino acids and derivatives	7349-78-2	3	32527.5	24724.5	52153.7	4807.7	6548.74	6483.45	11795.2	8547.26	22708.6	13100.2	15668	12322	-	-	-	-	-	-	-	-	-	-	-	-	1.05098	0.0951693	0.3935	-1.34557	down	1.2303	0.0639397	0.163062	-2.61651	down
C22H25N3O7	Phe-Tyr-Asp	Amino acids and derivatives	Amino acids and derivatives	-	3	1.40565e+06	1.404e+06	1.76244e+06	5.50903e+06	5.42664e+06	5.25175e+06	6.13071e+06	6.21636e+06	5.56876e+06	4.33451e+06	4.20604e+06	4.62887e+06	-	-	-	-	-	-	-	-	-	-	-	-	1.2999	0.000203195	3.91852	1.97031	up	1.25875	4.2229e-05	3.54048	1.82395	up
C23H22O12	Kaempferol-3-O-(2''-O-acetyl)glucoside	Flavonoids	Flavonols	-	3	224775	20399.9	160283	325143	366933	344523	127550	141932	87009.4	50704.7	94190	197256	-	-	-	-	-	-	-	1.18028	0.000586855	0.343905	-1.53992	down	-	-	-	-	-	-	-	-	-	-
C13H15N3O3	Glycyl-tryptophan	Amino acids and derivatives	Amino acids and derivatives	2390-74-1	3	197971	402867	244759	153422	160335	172482	344999	352867	335401	277119	342371	305468	-	-	-	-	-	-	-	1.21766	1.85877e-05	2.12502	1.08747	up	-	-	-	-	-	-	-	-	-	-
C29H34O17	Tricin-4'-O-glucoside-7-O-glucoside	Flavonoids	Flavones	-	3	301659	325796	243525	191444	259505	269422	439273	418893	327969	83398.5	194537	81695	-	-	1.17368	0.00566324	0.303196	-1.72168	down	-	-	-	-	-	-	-	-	-	-	-	-	-	-	-
C27H30O16	Luteolin-7,3'-di-O-glucoside	Flavonoids	Flavones	52187-80-1	3	361269	75844.3	151218	111439	90996.9	99334.6	20176.9	18065.4	20463.3	25277.2	24073.3	27700.4	-	-	-	-	-	-	-	1.21904	0.00476454	0.194537	-2.36188	down	1.19913	0.174637	0.0997833	-3.32506	down	-	-	-	-	-
C28H54NO7P	LysoPC 20:2	Lipids	LPC	-	3	56000.9	99781.7	99876.7	66378	65624	70419.4	31087.5	39673.9	32321.7	82525.4	85113.2	84314.9	-	-	1.27865	0.00154913	2.44418	1.28935	up	-	-	-	-	-	1.18931	0.0690668	0.403205	-1.31042	down	-	-	-	-	-
C10H17N3O6S	Glutathione reduced form	Amino acids and derivatives	Amino acids and derivatives	70-18-8	1	2.47291e+07	1.10239e+07	2.06078e+07	3.46267e+06	3.90057e+06	4.14684e+06	5.18501e+06	4.44804e+06	3.84913e+06	7.77585e+06	9.56038e+06	1.18153e+07	C00051	ko00270,ko00480,ko01100,ko01240,ko02010	1.20852	0.0359878	2.16223	1.11252	up	-	-	-	-	-	1.22292	0.0707913	0.239212	-2.06364	down	1.2108	0.0661293	0.204221	-2.29179	down
C11H12N2O2	1-Methoxy-indole-3-acetamide	Alkaloids	Plumerane	-	1	173013	176222	126255	1.08204e+06	1.29608e+06	1.14252e+06	137564	135974	137025	500407	483062	490878	-	-	1.2967	0.000178068	3.59104	1.8444	up	1.22229	0.00375352	0.116616	-3.10017	down	-	-	-	-	-	1.26272	0.00246421	7.40426	2.88836	up
C8H16N2O4S2	L-Homocystine	Amino acids and derivatives	Amino acids and derivatives	626-72-2	3	108851	109933	95472.8	33287.1	42350.6	34831.7	66773.3	59285.5	72996	80817.4	80805.7	58729.9	C01817	ko00270	-	-	-	-	-	-	-	-	-	-	-	-	-	-	-	1.25156	0.000699737	0.351526	-1.5083	down
C18H32O16	D-Panose	Others	Saccharides	33401-87-5	2	2.93675e+06	659404	1.24244e+06	3.94088e+06	3.99493e+06	3.96091e+06	1.50093e+06	1.76111e+06	1.58963e+06	1.62851e+06	1.91509e+06	2.22356e+06	C00713	-	-	-	-	-	-	1.21722	0.000691743	0.407816	-1.29401	down	-	-	-	-	-	-	-	-	-	-
C23H44N6O7S	Lys-Ser-Leu-Ala-Met	Amino acids and derivatives	Amino acids and derivatives	-	3	648354	3.74967e+06	1.40186e+06	467374	417863	271922	905322	746363	883496	253381	364675	318810	-	-	1.26031	0.00167839	0.369546	-1.43617	down	1.12196	0.00429455	2.19087	1.1315	up	-	-	-	-	-	1.00196	0.239002	0.199515	-2.32543	down
C9H10O4	(S)-2-Hydroxy-3-(4-Hydroxyphenyl)Propanoic Acid	Phenolic acids	Phenolic acids	23508-35-2	3	42021.8	34458.1	29347.6	91051.4	92712.2	103778	47805.3	41968	41537.9	56578.2	34341.6	41623.5	-	-	-	-	-	-	-	1.20982	0.00144968	0.456669	-1.13078	down	-	-	-	-	-	1.24209	0.000381517	2.71708	1.44205	up
C12H14O6	1-O-Caffeoylglycerol	Phenolic acids	Phenolic acids	-	3	100989	176107	171583	41264.1	42299.1	41304.3	39005.6	38512.2	61200.6	57373.8	80822.7	83660.1	-	-	-	-	-	-	-	-	-	-	-	-	1.21716	0.0413438	0.30917	-1.69353	down	1.22037	0.0471789	0.2783	-1.84529	down
C14H19NO9	4-Pyridoxic acid-O-glucoside	Others	Vitamin	-	3	118917	119408	160686	276263	541366	495402	626793	265352	235782	132809	217595	289032	-	-	-	-	-	-	-	-	-	-	-	-	1.0841	0.191621	2.8268	1.49917	up	1.17479	0.0613486	3.29071	1.7184	up
C28H36O13	Syringaresinol-4'-O-glucoside; Acanthoside B	Lignans and Coumarins	Lignans	7374-79-0	3	119214	115421	46972.4	325969	285442	265408	325271	18340	312973	169850	164437	188063	C10890	-	-	-	-	-	-	-	-	-	-	-	-	-	-	-	-	1.13807	0.00324668	3.11363	1.6386	up
C38H48N8O10	Glu-Phe-Tyr-Tyr-Arg	Amino acids and derivatives	Amino acids and derivatives	-	3	6.28107e+06	24126325	8.83537e+06	4.7584e+07	4.1348e+07	3.38168e+07	1.01819e+07	2.10483e+07	9.79374e+06	8.917e+06	9.18604e+06	7.34267e+06	-	-	-	-	-	-	-	1.1111	0.00749702	0.334211	-1.58117	down	-	-	-	-	-	1.07576	0.0186587	3.12793	1.64521	up
C26H28O13	2-(hydroxymethyl)-5-methoxy-3-(3-methoxy-4-((3,4,5-trihydroxy-6-(hydroxymethyl)tetrahydro-2H-pyran-2-yl)oxy)phenyl)-2,3-dihydro-9H-[1,4]dioxino[2,3-h]chromen-9-one	Lignans and Coumarins	Coumarins	-	2	272383	136387	223904	708191	302901	205459	118397	121189	110884	91700	132783	215960	-	-	-	-	-	-	-	1.02083	0.20151	0.288084	-1.79544	down	-	-	-	-	-	-	-	-	-	-
C14H14O8	Feruloylmalic acid	Phenolic acids	Phenolic acids	-	3	10370.8	12240.6	34392.4	47089.8	50377.3	38634.2	56541.2	56125.9	49000	13210	12266.5	6597.3	-	-	1.25146	0.000207176	0.198394	-2.33356	down	-	-	-	-	-	1.10373	0.0356802	2.83607	1.50389	up	1.00368	0.0581685	2.38758	1.25555	up
C27H38O15	Erythro-Guaiacylglycerol-β-threo-syringylglycerol Ether glucoside	Lignans and Coumarins	Lignans	-	1	19403.5	11559.2	12162.2	264779	279154	193938	113519	136221	92497.7	142696	149035	104291	-	-	-	-	-	-	-	1.1322	0.0222618	0.463817	-1.10837	down	1.28796	0.0130251	7.93597	2.98841	up	1.25801	0.012105	17.1101	4.09678	up
C9H12O4	Antiarol; 3,4,5-Trimethoxyphenol	Phenolic acids	Phenolic acids	642-71-7	3	60633.5	87149	25356.6	90147.4	79670.7	89144.6	86204.6	106227	89449.9	51198.5	23340	66136.5	C10765	-	1.00181	0.0453049	0.499058	-1.00272	down	-	-	-	-	-	-	-	-	-	-	-	-	-	-	-
C18H16O5	5,7,4'-Trimethoxyflavone	Flavonoids	Flavones	5631-70-9	3	175775	24842.4	178858	151982	103058	124012	43936.3	35695	36967.2	79059.8	92575	63386.2	-	-	1.21734	0.0337123	2.01564	1.01124	up	1.19533	0.0223416	0.307606	-1.70084	down	-	-	-	-	-	-	-	-	-	-
C21H20O9	Apigenin-6-C-rhamnoside	Flavonoids	Flavones	-	3	206288	146379	223989	567995	687012	630399	382545	232073	312232	341610	405242	286978	-	-	-	-	-	-	-	1.12579	0.0052563	0.491592	-1.02447	down	-	-	-	-	-	1.23257	0.000872788	3.26955	1.70909	up
C28H32N6O8	His-Phe-Tyr-Asp	Amino acids and derivatives	Amino acids and derivatives	-	3	461824	396627	504057	2.58337e+06	3.09426e+06	2.93973e+06	1.33425e+06	1.57134e+06	1.26044e+06	1.60529e+06	2.2475e+06	1.93891e+06	-	-	-	-	-	-	-	1.19257	0.00239349	0.483448	-1.04857	down	1.29089	0.00558191	3.05763	1.61241	up	1.26282	0.00284597	6.32463	2.66098	up
C10H16O	Dihydrocarvone	Others	Ketone compounds	7764-50-3	3	586401	783330	733108	303788	300853	324967	1.16901e+06	2.17709e+06	1.1538e+06	468886	476088	455351	C18018	-	1.2144	0.0926554	0.31119	-1.68413	down	1.17901	0.0722049	4.84065	2.2752	up	1.10514	0.138404	2.13992	1.09756	up	1.23913	0.0206361	0.442072	-1.17765	down
C23H22N2O7	Thr-Nap-OH	Amino acids and derivatives	Amino acids and derivatives	-	3	561283	434426	680478	345212	318507	427098	214843	224529	176130	435755	357234	366142	-	-	-	-	-	-	-	-	-	-	-	-	1.25245	0.0335073	0.367204	-1.44535	down	-	-	-	-	-
C22H31N5O9	Val-Asn-Tyr-Asp	Amino acids and derivatives	Amino acids and derivatives	-	3	511089	220458	1005205	1.75352e+06	1.61366e+06	1.47592e+06	1.29247e+06	1.54449e+06	2.18623e+06	4792670	7369285	1.92944e+06	-	-	-	-	-	-	-	-	-	-	-	-	1.04102	0.0365871	2.89229	1.53221	up	1.01336	0.0341964	2.7886	1.47954	up
C22H22O12	3'-O-Methyltricetin-7-O-glucoside	Flavonoids	Flavones	-	3	168811	103375	186834	564896	495171	513414	388893	370494	413682	412162	482346	396356	-	-	-	-	-	-	-	-	-	-	-	-	1.22482	0.00389366	2.5556	1.35366	up	1.21351	0.000423718	3.42792	1.77733	up
C10H14N5O7P	Adenosine 5'-monophosphate	Nucleotides and derivatives	Nucleotides and derivatives	61-19-8	3	3.74714e+06	3.01057e+06	3.7564e+06	3.22928e+06	3.17191e+06	3.62371e+06	1.10418e+07	1.01142e+07	1.46778e+07	2.1582e+07	1.98001e+07	2.02711e+07	C00020	ko00230,ko00908,ko01100,ko01110,ko01232,ko01240	-	-	-	-	-	1.20365	0.0242303	3.57448	1.83773	up	1.27937	0.0232964	3.40816	1.76899	up	-	-	-	-	-
C20H27N5O6	Trp-Gln-Thr	Amino acids and derivatives	Amino acids and derivatives	-	3	1.28843e+06	2.50533e+06	2.09249e+06	1.29783e+07	1.44265e+07	1.36817e+07	4.61489e+06	2.61247e+06	2.60786e+06	3.07198e+06	2.44282e+06	2.89914e+06	-	-	-	-	-	-	-	1.18498	0.000518179	0.239378	-2.06264	down	-	-	-	-	-	1.24474	3.44932e-05	6.98009	2.80325	up
C18H24N4O8	Tyr-Asn-Glu	Amino acids and derivatives	Amino acids and derivatives	-	3	504108	780239	862884	163714	199958	182185	126354	106544	118050	91199.8	95656.6	84454.7	-	-	-	-	-	-	-	-	-	-	-	-	1.28736	0.0309862	0.163443	-2.61314	down	1.23098	0.0378176	0.254214	-1.97588	down
C30H48O	Olean-12-en-3-one (β-Amyrone)	Terpenoids	Triterpene	638-97-1	3	54740.4	45835.5	105548	22040.5	29502.2	31328.1	35647.9	23032.9	21409.5	5880.7	29533.9	17898.2	-	-	-	-	-	-	-	-	-	-	-	-	1.09052	0.145901	0.388554	-1.36381	down	1.07641	0.154958	0.402044	-1.31458	down
C22H27N7O5	Trp-Gln-His	Amino acids and derivatives	Amino acids and derivatives	-	3	1.41737e+06	1.43728e+06	1.21236e+06	616354	630538	466229	863020	944073	868662	684503	585897	660756	-	-	-	-	-	-	-	-	-	-	-	-	-	-	-	-	-	1.22791	0.00135338	0.421222	-1.24735	down
C17H23N3O7S1	Tyr-Glu-Cys	Amino acids and derivatives	Amino acids and derivatives	-	3	532352	627365	650889	1.37826e+06	1.36226e+06	1.40095e+06	2005695	834190	903792	1.31128e+06	960698	1.19387e+06	-	-	-	-	-	-	-	-	-	-	-	-	-	-	-	-	-	1.25491	0.000985494	2.28733	1.19367	up
C13H18N2O2	p-Coumaroylputrescine	Alkaloids	Phenolamine	34136-53-3	3	1.00137e+06	1.47976e+06	1.47934e+06	501629	390787	408396	353141	480037	396708	672895	474597	573345	C18326	ko00330,ko01100	-	-	-	-	-	-	-	-	-	-	1.2665	0.0243809	0.310541	-1.68715	down	1.22539	0.0264168	0.328449	-1.60626	down
C10H19N3O4	Asn-Leu	Amino acids and derivatives	Amino acids and derivatives	22601-71-4	3	152785	298972	167456	114402	76103.2	107237	132405	105787	99643.6	149836	164199	138721	-	-	-	-	-	-	-	-	-	-	-	-	-	-	-	-	-	1.03446	0.140459	0.480841	-1.05637	down
C22H22O13	1-O-Caffeoyl-6-O-galloyl-β-D-glucose	Phenolic acids	Phenolic acids	-	3	135862	26707.2	117004	81421.4	68290.3	83239.8	11512	23483.9	12893	41918.9	59908.3	66838.6	-	-	1.20128	0.0172792	3.52202	1.8164	up	1.17829	0.000651293	0.205575	-2.28227	down	1.06741	0.147255	0.171293	-2.54546	down	-	-	-	-	-
C25H26O14	Syringetin-3-O-(6''-Acetyl)glucoside	Flavonoids	Flavonols	-	3	97785.1	277654	408915	365503	384357	339208	1.83699e+06	1.61118e+06	1.37728e+06	151065	149673	128729	-	-	1.29257	0.00795901	0.0890005	-3.49004	down	1.21385	0.0105934	4.4308	2.14757	up	1.19468	0.00188697	6.15212	2.62108	up	-	-	-	-	-
C33H58O14	1-Linoleoylglycerol-2,3-di-O-glucoside*	Lipids	Glycerol ester	-	3	13357.6	14926	10707.4	5427.7	7945.16	6420.24	8727.29	5184.7	9568.65	11757.8	17196.4	19515.9	-	-	1.08023	0.0473176	2.06426	1.04562	up	-	-	-	-	-	-	-	-	-	-	-	-	-	-	-
C33H58O14	2-Linoleoylglycerol-1,3-di-O-glucoside*	Lipids	Glycerol ester	-	3	13357.6	14926	10707.4	5427.7	7945.16	6420.24	8727.29	5184.7	9568.65	11757.8	17196.4	19515.9	-	-	1.08023	0.0473176	2.06426	1.04562	up	-	-	-	-	-	-	-	-	-	-	-	-	-	-	-
C9H13N3O5	Cytarabine	Nucleotides and derivatives	Nucleotides and derivatives	147-94-4	3	1.30722e+06	1.80688e+06	2.71636e+06	869937	904387	1.10662e+06	786428	1.14561e+06	1.38216e+06	2.56882e+06	2.97772e+06	3.32454e+06	C02961	-	1.21934	0.00317942	2.67669	1.42045	up	-	-	-	-	-	-	-	-	-	-	1.06026	0.135943	0.494119	-1.01707	down
C15H20N2O6	Tatarine	Alkaloids	Alkaloids	-	3	1.98856e+07	2.77731e+07	2.85375e+07	1.36571e+07	1.30706e+07	1.30644e+07	3.42659e+07	3.56795e+07	3.63031e+07	2.22337e+07	2.22738e+07	2.11734e+07	-	-	-	-	-	-	-	1.22274	0.000247723	2.67009	1.41689	up	-	-	-	-	-	-	-	-	-	-
C29H46N6O10	Leu-Ser-Glu-Lys-Tyr	Amino acids and derivatives	Amino acids and derivatives	-	3	448152	734712	842006	356438	292822	310366	263131	401150	424362	353925	321995	307423	-	-	-	-	-	-	-	-	-	-	-	-	-	-	-	-	-	1.11136	0.0907558	0.47392	-1.07728	down
C6H8O6	Erythorbic Acid; Isoascorbic Acid	Others	Vitamin	89-65-6	3	474946	183517	244605	70069.1	70117.2	79864.2	32392.2	19589.1	60020	59754.2	57203.8	58430.3	-	-	-	-	-	-	-	-	-	-	-	-	1.21081	0.0944851	0.124023	-3.01132	down	1.16831	0.124023	0.24367	-2.037	down
C9H13N3O4	2'-Deoxycytidine	Nucleotides and derivatives	Nucleotides and derivatives	951-77-9	3	9	9	9	332836	225190	233198	161821	236983	136898	323107	333829	288450	C00881	ko00240,ko01100,ko01232,ko02010	-	-	-	-	-	-	-	-	-	-	1.30888	0.0272268	19840.8	14.2762	up	1.26963	0.0168032	29304.6	14.8388	up
C22H22O13	1-O-Caffeoyl-4-O-galloyl-β-D-glucose	Phenolic acids	Phenolic acids	-	3	144741	45108.4	133560	42363.6	71393	72309.9	14735.3	50571.5	13814.1	56665	52496	61730.9	-	-	-	-	-	-	-	-	-	-	-	-	1.039	0.108904	0.244646	-2.03123	down	-	-	-	-	-
C27H30O16	Quercetin-3-O-neohesperidoside*	Flavonoids	Flavonols	29662-79-1	3	459150	860647	911956	53137.3	108811	134313	583169	607596	478963	70865.7	49102.4	107440	-	-	1.26289	0.00236367	0.136195	-2.87626	down	1.16389	0.0014398	5.636	2.49467	up	-	-	-	-	-	1.20087	0.042554	0.132748	-2.91324	down
C22H22O12	4-O-(6'-O-Glucosylcaffeoyl)-3,4-dihydroxybenzoic acid	Phenolic acids	Phenolic acids	-	3	12467.1	5005	5005	105956	103103	94657.7	27812.1	28119.8	29513.4	14998.1	26703.4	17666.8	-	-	-	-	-	-	-	1.22132	0.00176699	0.281332	-1.82965	down	1.20895	0.0110965	3.80144	1.92655	up	1.23942	4.74094e-05	13.5123	3.7562	up
C10H11NO3	N-Phenylacetylglycine	Amino acids and derivatives	Amino acids and derivatives	500-98-1	3	33948.5	41182.6	91700	192018	182542	221770	300857	303682	261839	103761	135043	101154	C05598	ko00360	1.26653	0.000669101	0.39239	-1.34964	down	-	-	-	-	-	1.23342	0.000747106	5.19315	2.37661	up	1.15039	0.0045724	3.57445	1.83772	up
C29H42O9	gofruside	Terpenoids	Ditepenoids	26931-65-7	1	556751	315970	859361	9	9	9	573047	453868	560432	671982	492786	874324	-	-	-	-	-	-	-	1.22372	0.00506501	58790.7	15.8433	up	-	-	-	-	-	1.26911	0.0667944	1.55882e-05	-15.9692	down
C28H32O14	Acacetin-7-O-rutinoside (Linarin)	Flavonoids	Flavones	480-36-4	3	270060	122967	183098	31313.2	34367.1	52517.2	35583	45183.5	34359.9	64984.4	60518.3	70786.4	-	-	-	-	-	-	-	-	-	-	-	-	1.24858	0.0683724	0.199828	-2.32317	down	1.19846	0.066874	0.205159	-2.28519	down
C15H16O9	Sinapoyl malate	Phenolic acids	Phenolic acids	92344-58-6	3	1.41161e+06	1.04562e+06	1.08376e+06	439841	407745	429306	1.16116e+06	1.43137e+06	1.04827e+06	1.74155e+06	1.80578e+06	1.94761e+06	C02887	ko00940,ko01110	-	-	-	-	-	1.20322	0.0195915	2.8513	1.51162	up	-	-	-	-	-	1.24674	0.0222799	0.360603	-1.47152	down
C32H42O17	1-Hydroxypineolin Diglucoside	Lignans and Coumarins	Lignans	-	2	15769.2	34226.1	16000	72489.1	76938.9	77775.8	23556.8	33779.6	31125.2	11113.2	15117.3	20003	-	-	-	-	-	-	-	1.19108	0.000827348	0.389349	-1.36086	down	-	-	-	-	-	1.18655	0.00893463	3.44272	1.78355	up
C26H34O12	Cycloolivil-6-O-glucoside	Lignans and Coumarins	Lignans	-	2	186460	221666	320347	148642	145997	252203	83626.3	93458.9	28382.7	105277	56730.3	49822.2	-	-	-	-	-	-	-	-	-	-	-	-	1.12044	0.0310174	0.282053	-1.82596	down	-	-	-	-	-
C27H30O15	Apigenin-6,8-di-C-glucoside (Vicenin-2)	Flavonoids	Flavones	23666-13-9	3	346447	334222	88154.9	6670	11830.8	8129.35	21675	7388.54	35010	25819.2	26279.8	18712.8	C10195	-	-	-	-	-	-	-	-	-	-	-	1.16312	0.106612	0.0833397	-3.58485	down	1.21258	0.0987582	0.0346375	-4.85152	down
C30H52O26	Maltopentaose	Others	Saccharides	34620-76-3	3	128395	15040.3	23340	442360	584535	470780	216835	155090	256905	323705	602945	303660	-	-	-	-	-	-	-	1.13969	0.00757912	0.419871	-1.25198	down	1.04584	0.0324786	3.77052	1.91476	up	1.1356	0.00162711	8.9802	3.16675	up
C17H27N5O10	Gln-Ala-Glu-Asp	Amino acids and derivatives	Amino acids and derivatives	-	3	2.01316e+06	1.19956e+06	1.25466e+06	2.51679e+06	2.86303e+06	3.23198e+06	3.4053e+06	4.39977e+06	3.06949e+06	3.02276e+06	3.27946e+06	3.68549e+06	-	-	-	-	-	-	-	-	-	-	-	-	1.20393	0.015383	2.43421	1.28346	up	-	-	-	-	-
C7H14O6	L-Quebrachitol	Others	Saccharides	642-38-6	3	21193.6	8721.22	15612.6	27646.5	32996.7	32870.6	12776.1	12615.7	15517.9	11598	20717.9	11208.7	-	-	-	-	-	-	-	1.19532	0.00290233	0.437473	-1.19273	down	-	-	-	-	-	1.04318	0.0300552	2.05401	1.03844	up
C27H30O15	Luteolin-7-O-neohesperidoside (Lonicerin)	Flavonoids	Flavones	25694-72-8	1	142328	841568	1.57474e+06	91208.3	108837	187714	71831.2	31675	50738.5	97575.9	21675	63350	C12630	ko00944	-	-	-	-	-	1.00548	0.105454	0.397785	-1.32994	down	1.11926	0.192112	0.0602839	-4.05208	down	-	-	-	-	-
C14H20O8	3,4-dihydroxyphenylethanol-β-D-glucopyranoside	Phenolic acids	Phenolic acids	-	3	8694.23	30259.2	12529.5	128353	98889	112850	14049.6	61964.3	71163.1	84143	99097.4	88800.5	-	-	-	-	-	-	-	-	-	-	-	-	-	-	-	-	-	1.19319	0.0011353	6.60592	2.72376	up
C10H12O5	2,4,5-Trimethoxybenzoic acid	Phenolic acids	Phenolic acids	-	3	75228.4	82123.5	111251	9	9	9	93386.4	61537.5	95337	9	9	9	-	-	1.29623	0.0168183	0.000107887	-13.1782	down	1.2233	0.0168183	9268.92	13.1782	up	-	-	-	-	-	1.26994	0.0148668	0.00010052	-13.2802	down
C25H28O13	Syringic acid-4-O-(6''-feruloyl)glucoside	Phenolic acids	Phenolic acids	-	3	19606.5	16675	7955.69	97331.1	69087.7	110296	141715	217848	196031	45786.2	61729	65607.1	-	-	1.24463	0.0238065	0.311599	-1.68224	down	1.07603	0.0350275	2.00782	1.00563	up	1.27469	0.0154279	12.5594	3.6507	up	1.21048	0.0175613	6.25525	2.64507	up
C6H11NO2	L-Pipecolic Acid	Organic acids	Organic acids	3105-95-1	1	1.90327e+06	2.90062e+06	2.37488e+06	7.82457e+06	8.26137e+06	7.94868e+06	4.23313e+06	3.99306e+06	3.75212e+06	6.22048e+06	6.0326e+06	4.44273e+06	C00408	ko00310,ko00960,ko01100,ko01110	-	-	-	-	-	1.21721	3.0686e-05	0.498377	-1.00469	down	-	-	-	-	-	1.24609	0.000600227	3.34801	1.74331	up
C10H10O2	2-Methyl-3-hydroxyindan-1-one	Others	Others	-	1	2.08162e+07	2.18134e+07	2.18616e+07	1.63549e+07	1.52876e+07	1.47607e+07	6.72756e+06	9.73884e+06	9.64012e+06	1.77364e+07	1.812e+07	1.73764e+07	-	-	1.22917	0.00919345	2.03906	1.02791	up	-	-	-	-	-	1.26711	0.00284452	0.404808	-1.30469	down	-	-	-	-	-
C17H20O9	1-O-Feruloylquinic acid	Phenolic acids	Phenolic acids	-	3	1.14408e+06	386035	1.67463e+06	6.9572e+06	6.72819e+06	7.48562e+06	2.85331e+06	2.69589e+06	3.52085e+06	3.12893e+06	3.27212e+06	2.71987e+06	-	-	-	-	-	-	-	1.19762	0.000306006	0.428418	-1.22291	down	1.05265	0.0163311	2.83019	1.5009	up	1.16063	0.000524321	6.60614	2.72381	up
C11H14N2O	N-Methylserotonin	Alkaloids	Plumerane	1134-01-6	3	22138	15300.6	29301.9	163909	158416	143611	66178.2	89884.4	89418.2	85670.8	64470.1	67485.1	C06212	ko00380	-	-	-	-	-	-	-	-	-	-	1.24648	0.00662688	3.67814	1.87897	up	1.2434	0.000138582	6.98131	2.8035	up
C27H30O15	Vitexin-2''-O-galactoside	Flavonoids	Flavones	-	1	319556	128937	241637	378895	391253	325243	151099	115544	138210	115698	117236	102812	-	-	-	-	-	-	-	1.20114	0.00210882	0.369597	-1.43598	down	-	-	-	-	-	-	-	-	-	-
C15H22N2O18P2	Uridine-5'-diphosphoglucuronic acid	Nucleotides and derivatives	Nucleotides and derivatives	-	3	280418	199934	217867	93108.6	104759	131070	80985.7	68312.2	103165	162831	205351	139762	-	-	1.17466	0.0288492	2.01195	1.0086	up	-	-	-	-	-	1.25019	0.0150125	0.361581	-1.46761	down	1.18806	0.0224315	0.471109	-1.08587	down
C13H18O7	3-Hydroxy-5-Methylphenol-1-O-Glucoside	Phenolic acids	Phenolic acids	-	3	22917.9	11958.5	16891	173685	230551	229691	52330.5	61807.3	52505.5	64045.3	56481.7	72941.5	-	-	-	-	-	-	-	1.20805	0.0124851	0.262874	-1.92755	down	1.24759	0.00100674	3.21908	1.68665	up	1.25177	0.0078895	12.2457	3.6142	up
C14H18N2O4	Phe-Hyp	Amino acids and derivatives	Amino acids and derivatives	90965-82-5	3	47275.5	32270.2	49331	102684	106810	100143	25423.9	31360.9	21318.3	20081.9	34686.3	31586.7	-	-	-	-	-	-	-	1.20887	7.26168e-05	0.25224	-1.98713	down	-	-	-	-	-	1.21055	0.00382348	2.40259	1.26459	up
C14H18O9	5-Glucosyloxy-2-Hydroxybenzoic acid methyl ester	Phenolic acids	Phenolic acids	-	3	160955	126863	150085	96956.7	33395.9	60444.7	82129.6	85950.6	75107.2	22561.4	18881.1	28850.4	-	-	1.27018	0.000188937	0.289048	-1.79062	down	-	-	-	-	-	-	-	-	-	-	1.04579	0.0277872	0.435706	-1.19857	down
C33H44O17	Syringaresnol-4-O-beta-D-apiofuranosy	Lignans and Coumarins	Lignans	136997-64-3	2	1.42254e+06	928994	2.11817e+06	1.06128e+06	1.29384e+06	696762	3.19611e+06	2.18225e+06	2.2184e+06	1.0379e+06	1.44834e+06	1.71123e+06	-	-	-	-	-	-	-	1.10361	0.0269338	2.4892	1.31568	up	-	-	-	-	-	-	-	-	-	-
C21H27N5O7	Gln-Trp-Glu	Amino acids and derivatives	Amino acids and derivatives	-	3	64694.6	543135	95338.7	2.30552e+06	2.50891e+06	2.66229e+06	936780	1.30295e+06	1.03492e+06	2.41753e+06	2.28375e+06	2.40534e+06	-	-	1.25724	0.00310488	2.17019	1.11782	up	1.18605	0.000753412	0.43798	-1.19106	down	1.0839	0.0134984	4.65699	2.2194	up	1.1556	0.000561072	10.6329	3.41046	up
C7H12O4	Pimelic acid*	Organic acids	Organic acids	111-16-0	3	43177.9	95280.3	57949.4	35062.8	19184.2	52104	35033.9	25127.5	31616.6	40506.6	36484.2	53535.3	C02656	ko00780,ko01100,ko01240	-	-	-	-	-	-	-	-	-	-	1.07593	0.1492	0.467283	-1.09763	down	-	-	-	-	-
C24H22O14	Luteolin-7-O-(6''-malonyl)glucoside	Flavonoids	Flavones	-	3	8340	9	7737.2	285158	280971	182004	88822.3	109083	36675	3710.47	5704.12	8386.19	C10103	-	1.23438	0.0781406	0.0758834	-3.72007	down	1.05755	0.018133	0.313555	-1.67321	down	-	-	-	-	-	-	-	-	-	-
C8H8O	(S)-2-Phenyloxirane	Phenolic acids	Phenolic acids	20780-54-5	2	537164	748556	825382	1.04328e+06	1.32519e+06	1.33374e+06	528997	676834	623446	1.43274e+06	1.41693e+06	1.53988e+06	C20782	ko01100	1.27745	0.000134245	2.39961	1.2628	up	1.16898	0.0116007	0.494103	-1.01712	down	-	-	-	-	-	-	-	-	-	-
C14H20O6	2-Phenylethy-1-O-β-D-glucoside	Phenolic acids	Phenolic acids	18997-54-1	3	139979	42603.3	28740.6	160425	49815	120913	103060	136662	109627	66497.7	27337.3	51680	-	-	1.1132	0.0117714	0.416532	-1.2635	down	-	-	-	-	-	-	-	-	-	-	-	-	-	-	-
C16H21N3O3	Val-Trp	Amino acids and derivatives	Amino acids and derivatives	24587-37-9	3	193259	340803	154617	66399.2	79861.4	35130.7	94836.7	76153.6	31675	173786	130165	109524	-	-	-	-	-	-	-	-	-	-	-	-	1.09903	0.0918816	0.294281	-1.76473	down	1.12424	0.0895483	0.26339	-1.92473	down
C13H16O9	1-O-Galloyl-rhamnose	Phenolic acids	Phenolic acids	-	3	69387.5	52882.9	74722.3	130099	107659	140194	338305	325354	309851	123444	93538.7	131102	-	-	1.26994	0.000225602	0.357556	-1.48376	down	1.20545	0.000112931	2.57575	1.36499	up	1.29875	2.41533e-05	4.94186	2.30505	up	-	-	-	-	-
C23H38N8O8	His-Gly-Val-Asp-Lys	Amino acids and derivatives	Amino acids and derivatives	-	3	833630	288037	611014	165812	540430	538621	122706	163574	252530	250668	226060	246783	-	-	-	-	-	-	-	-	-	-	-	-	1.08292	0.12151	0.310969	-1.68516	down	-	-	-	-	-
C26H26O11	4-O-(2''-O-acetyl-6''-P-coumaroyl-β-D-glucopyranosyl)-P-coumaric acid	Others	Others	-	2	9	9	9	1.57321e+06	1.11021e+06	1.6873e+06	424623	556377	592290	488740	602181	664151	-	-	-	-	-	-	-	1.16274	0.0264478	0.359962	-1.47409	down	1.30929	0.00931431	58270	15.8305	up	1.26967	0.0143534	161878	17.3046	up
C18H36O3	DL-2-hydroxystearic acid*	Lipids	Free fatty acids	629-22-1	1	286940	258988	341017	632876	694440	694414	327592	281912	320984	335508	279316	313920	-	-	-	-	-	-	-	1.21091	0.000264249	0.460243	-1.11953	down	-	-	-	-	-	1.23991	0.000322495	2.27943	1.18867	up
C3H7NO2	N-Methylglycine	Amino acids and derivatives	Amino acids and derivatives	107-97-1	3	52295.7	30304.5	23237.3	120043	88450.9	95424.8	121702	47707.4	71475.9	110143	104344	92800.9	C00213	ko00260,ko00330,ko01100	-	-	-	-	-	-	-	-	-	-	-	-	-	-	-	1.1563	0.00719427	2.87156	1.52183	up
C25H35N7O7S	His-Thr-Phe-Cys-Ala	Amino acids and derivatives	Amino acids and derivatives	-	3	5.9699e+06	4.63336e+06	8.60523e+06	2.17572e+07	1.93145e+07	2.0036e+07	4.6412e+06	5.89333e+06	5.45743e+06	1.46889e+07	7.90514e+06	1.39423e+07	-	-	1.14659	0.0818884	2.28467	1.19199	up	1.2152	0.000370684	0.261701	-1.93401	down	-	-	-	-	-	1.20855	0.00125324	3.18129	1.66961	up
C28H41N7O6S	Leu-Gly-His-Phe-Met	Amino acids and derivatives	Amino acids and derivatives	-	3	29906.3	16875.9	45915.9	922939	1.00203e+06	728082	546574	966275	377849	427275	683934	939795	-	-	-	-	-	-	-	-	-	-	-	-	1.26675	0.0753242	20.3963	4.35024	up	1.24742	0.00843628	28.6203	4.83897	up
C14H18O9	1-O-Vanilloyl-D-Glucose	Phenolic acids	Phenolic acids	-	2	659649	369981	268344	78390.7	84512.6	87382.2	139608	81256.3	87839.6	9	9	9	C20470	-	1.29601	0.0306858	8.74625e-05	-13.481	down	-	-	-	-	-	1.19088	0.103146	0.237835	-2.07197	down	1.20068	0.0965459	0.192828	-2.37461	down
C21H20O12	Myricetin-3-O-rhamnoside (Myricitrin)	Flavonoids	Flavonols	17912-87-7	3	3749.57	4218.21	6670	12651.6	12629.5	16345.2	24730.4	10306	26131.5	21925.1	15454.7	20139.1	C10108	-	-	-	-	-	-	-	-	-	-	-	1.16898	0.0875609	4.17877	2.06308	up	1.18769	0.00547536	2.84376	1.5078	up
C27H52NO7P	LysoPC 19:2	Lipids	LPC	-	3	59903.4	42005.5	93156.9	54006.7	97625.3	89894.3	48062	33128.6	29893.4	71964.4	64857.9	71271.5	-	-	-	-	-	-	-	1.04556	0.0673546	0.459925	-1.12053	down	-	-	-	-	-	-	-	-	-	-
C9H6O3	6-hydroxycoumarin	Lignans and Coumarins	Coumarins	6093-68-1	1	2.93551e+06	1.91352e+06	3.7066e+06	1.55663e+07	7.24049e+06	1.18658e+07	4.69719e+06	4.79904e+06	4.81685e+06	5.56672e+06	5.23101e+06	4.55026e+06	-	-	-	-	-	-	-	1.07845	0.106209	0.412807	-1.27646	down	-	-	-	-	-	1.16403	0.062838	4.05261	2.01885	up
C27H30O16	Kaempferol-3,7-O-diglucoside	Flavonoids	Flavonols	25615-14-9	3	50015	38345	48341.8	58681.7	130065	161765	34743	30574.6	51680	49212.2	73355	43742.6	-	-	-	-	-	-	-	1.01601	0.119552	0.333791	-1.58298	down	-	-	-	-	-	1.01783	0.142483	2.56406	1.35843	up
C26H28O14	Apigenin-6-C-(2''-glucosyl)arabinoside	Flavonoids	Flavones	-	3	189792	139316	51680	41687	6045.12	30528.8	14673.4	10966.5	4889.61	12040.3	8129.28	14983.1	-	-	-	-	-	-	-	-	-	-	-	-	1.20846	0.100831	0.0801744	-3.64071	down	-	-	-	-	-
C28H36N6O8	Gly-Phe-Asn-Thr-Phe	Amino acids and derivatives	Amino acids and derivatives	-	3	10005	4894.95	18896	58350	24300	52424.4	260753	205900	423196	40179.3	36571	21937.3	-	-	1.25523	0.0551243	0.110904	-3.17262	down	1.15132	0.0577665	6.58784	2.71981	up	1.26674	0.0479962	26.33	4.71864	up	1.05536	0.069564	3.99676	1.99883	up
C3H7O6P	DL-Glyceraldehyde-3-phosphate	Organic acids	Organic acids	591-59-3	3	101263	122013	83971.7	334234	246683	244327	46680.3	99435.2	41170.7	158573	77849.6	202218	C00661	-	-	-	-	-	-	1.14581	0.00633849	0.226947	-2.13958	down	-	-	-	-	-	1.22001	0.0182452	2.68593	1.42542	up
C29H46N6O9S	Ile-Glu-Tyr-Cys-Lys	Amino acids and derivatives	Amino acids and derivatives	-	3	510406	1.04407e+06	1.00239e+06	2.00737e+07	2.09477e+07	2.22427e+07	8.38307e+06	1.05968e+07	9.75167e+06	9.3185e+06	9.6862e+06	1.16873e+07	-	-	-	-	-	-	-	1.2022	0.000217638	0.454153	-1.13875	down	1.28298	0.00341584	11.237	3.49019	up	1.25662	0.000464536	24.7428	4.62894	up
C7H13NO3S	N-Acetyl-L-Methionine	Amino acids and derivatives	Amino acids and derivatives	65-82-7	3	29709.5	22292.6	33363.1	15122.1	12066.1	15236.7	13836.9	17121.1	17004.4	21892.9	33340	18747.6	C02712	-	-	-	-	-	-	-	-	-	-	-	-	-	-	-	-	1.17953	0.0378975	0.496981	-1.00874	down
C21H22O11	Dihydrokaempferol-3-O-glucoside	Flavonoids	Flavanonols	31049-08-8	3	728737	202391	486378	313797	186196	259475	93538.5	128311	122217	232085	219001	183388	-	-	-	-	-	-	-	1.10818	0.054891	0.453036	-1.1423	down	1.11826	0.142273	0.242726	-2.0426	down	-	-	-	-	-
C34H37N3O6	N',N'',N'''-p-Coumaroyl-cinnamoyl-caffeoyl spermidine	Alkaloids	Phenolamine	-	3	151418	314433	285477	143198	173353	173721	99888.2	98756.7	141804	149858	131798	125635	-	-	-	-	-	-	-	-	-	-	-	-	1.08808	0.102882	0.453129	-1.14201	down	-	-	-	-	-
C20H18O11	Quercetin-3-O-xyloside (Reynoutrin)	Flavonoids	Flavonols	549-32-6	3	116428	18123.5	118937	61336.9	27373.9	60315.9	68355	25873.4	58753.6	15602.3	13351.9	24375.6	-	-	1.06321	0.114794	0.348602	-1.52035	down	-	-	-	-	-	-	-	-	-	-	-	-	-	-	-
C18H36O3	2R-Hydroxyoctadecanoic Acid*	Lipids	Free fatty acids	26633-48-7	1	287793	289999	345284	639504	720649	705697	329157	325618	315293	324317	288387	312674	C03042	-	-	-	-	-	-	1.2176	0.00380356	0.469573	-1.09058	down	-	-	-	-	-	1.24869	0.000390946	2.238	1.16221	up
C16H24N4O3	N-Feruloylhomoagmatine	Alkaloids	Phenolamine	-	2	213829	337823	366078	257072	221971	65385	53035.7	129455	63093.5	113209	179889	104706	-	-	-	-	-	-	-	-	-	-	-	-	1.18978	0.0239269	0.2676	-1.90185	down	-	-	-	-	-
C16H24O7	3-Hydroxy-4-isopropylbenzylalcohol-3-O-glucoside	Phenolic acids	Phenolic acids	-	3	316160	100877	278501	1.50416e+06	1.53683e+06	1.64063e+06	867482	891205	896949	949102	3.76832e+06	1.07309e+06	-	-	-	-	-	-	-	-	-	-	-	-	1.17548	0.0091769	3.81811	1.93286	up	1.19109	0.000232234	6.73095	2.75081	up
C10H11NO2	5-Hydroxytryptophol	Alkaloids	Plumerane	154-02-9	3	129325	187549	182458	452345	619989	631469	342256	284913	289566	423160	389295	431808	-	-	-	-	-	-	-	-	-	-	-	-	-	-	-	-	-	1.22756	0.0135003	3.41217	1.77069	up
C30H46N8O11	Leu-Asp-Tyr-Arg-Glu	Amino acids and derivatives	Amino acids and derivatives	-	3	151790	37314.8	90035	9	9	9	56084.5	90042.2	229036	155276	152939	97092.7	-	-	-	-	-	-	-	1.21974	0.141886	13894.9	13.7623	up	-	-	-	-	-	1.26556	0.106589	9.67259e-05	-13.3357	down
C22H20O12	Diosmetin-7-O-glucuronide	Flavonoids	Flavones	35110-20-4	3	9	9	9	143847	258560	165875	46778.5	179616	172690	70412.7	108463	108359	-	-	-	-	-	-	-	-	-	-	-	-	1.30336	0.0911581	14780.9	13.8514	up	1.26912	0.0327467	21047.5	14.3614	up
C28H24N2O6	Nap-HoPhe-OH	Amino acids and derivatives	Amino acids and derivatives	-	3	1.25191e+06	1.19612e+06	1.56652e+06	480609	746387	728516	785428	807712	711837	2.14923e+06	2.1183e+06	2.76161e+06	-	-	1.27845	0.0158115	3.04955	1.6086	up	-	-	-	-	-	-	-	-	-	-	1.16156	0.0106914	0.487106	-1.03769	down
C29H26O17	1-O-Caffeoyl-4,6-di-O-galloyl-β-D-glucose*	Phenolic acids	Phenolic acids	-	3	5474.2	3151.26	5005	11367.5	15161.1	20239.1	7196.91	8096.7	6463.5	6747.7	9913.49	13353.2	-	-	-	-	-	-	-	1.1034	0.0787745	0.465217	-1.10402	down	-	-	-	-	-	1.18073	0.0418653	3.43111	1.77868	up
C9H13NO	L-Phenylalaninol	Amino acids and derivatives	Amino acids and derivatives	3182-95-4	3	13240.1	5187.07	23588.8	49494.5	80056.3	102075	90027.5	113624	84259.3	9	9	9	-	-	1.2966	0.00864867	9.3779e-05	-13.3804	down	-	-	-	-	-	1.20397	0.00321057	6.85242	2.77661	up	1.11329	0.0414986	5.51281	2.46279	up
C23H26O11	3,5-Digalloylshikimic acid	Phenolic acids	Phenolic acids	95753-52-9	3	9615.12	12844.4	9591.33	41640	33946.3	18340	37659.2	20165.3	31663.6	21993.6	14651.3	8699.33	-	-	-	-	-	-	-	-	-	-	-	-	1.20848	0.0593598	2.79206	1.48133	up	1.13215	0.0915273	2.93054	1.55117	up
C7H6O2	2-Hydroxybenzaldehyde (Salicylaldehyde)	Phenolic acids	Phenolic acids	90-02-8	3	60118.7	25433.9	66930.2	81938.2	90366.6	98686.1	13777.9	62451.6	37122.5	104099	119147	77790.9	C06202	ko01100	1.00728	0.0288811	2.65577	1.40913	up	-	-	-	-	-	-	-	-	-	-	-	-	-	-	-
C17H24O9	Syringin	Phenolic acids	Phenolic acids	118-34-3	3	101229	98616.2	87755.9	77286.7	62276.5	127873	32422.2	31269.1	25968.8	27361.6	32377.2	29505.9	C01533	ko00940	-	-	-	-	-	1.12655	0.0947712	0.335257	-1.57666	down	1.29624	0.000896129	0.311752	-1.68153	down	-	-	-	-	-
C6H4N4O2	Lumazine	Nucleotides and derivatives	Nucleotides and derivatives	487-21-8	2	9840.45	11767.8	29559.6	110280	57906.6	100117	73457.8	91073.4	120054	22273	41256.1	87815.1	C03212	-	-	-	-	-	-	-	-	-	-	-	1.21121	0.0161352	5.5618	2.47555	up	1.15093	0.0324451	5.2436	2.39056	up
C19H32N6O10	Asp-Gly-Lys-Ala-Asp	Amino acids and derivatives	Amino acids and derivatives	-	3	1.63009e+07	2.51815e+07	3.63498e+07	1.2203e+07	1.25409e+07	1.23683e+07	9.55659e+06	7.34235e+06	7.92994e+06	7.53196e+06	7.44045e+06	6.27986e+06	-	-	-	-	-	-	-	-	-	-	-	-	1.19812	0.0911247	0.319005	-1.64835	down	1.05952	0.144105	0.476824	-1.06847	down
C25H34N6O8	His-Tyr-Ile-Asp	Amino acids and derivatives	Amino acids and derivatives	-	3	1.32418e+06	930884	1.17632e+06	2.20182e+06	2.19207e+06	2.83267e+06	397398	862002	820218	833297	756287	818096	-	-	-	-	-	-	-	1.13145	0.00393236	0.287774	-1.79699	down	-	-	-	-	-	1.19313	0.0126061	2.10602	1.07452	up
C23H24O13	Syringetin-7-O-glucoside	Flavonoids	Flavonols	-	3	657038	396622	377842	973329	1.60122e+06	978343	1.37962e+06	839483	1.45423e+06	337152	466442	332317	-	-	1.22136	0.0427861	0.309232	-1.69324	down	-	-	-	-	-	1.16303	0.0433803	2.56607	1.35956	up	1.12377	0.0600347	2.48193	1.31147	up
C27H30O15	Kaempferol-3-O-neohesperidoside*	Flavonoids	Flavonols	32602-81-6	1	676074	558047	1.36536e+06	205155	94925.1	127104	77281.8	27286.5	55975.4	84256.5	131745	83183.2	-	-	-	-	-	-	-	-	-	-	-	-	1.25574	0.0835041	0.06176	-4.01718	down	1.18528	0.100224	0.164335	-2.60529	down
C16H32N4O4S2	Met-Lys-Met	Amino acids and derivatives	Amino acids and derivatives	-	3	40811	58371	44447.8	1.74956e+06	1.58592e+06	1.38761e+06	28930.7	21176.4	34617.4	447684	368998	391508	-	-	1.28834	0.0031618	14.2602	3.83393	up	1.21965	0.00450445	0.0179384	-5.80081	down	-	-	-	-	-	1.26734	0.00458027	32.8838	5.0393	up
C10H13N5O3	5'-Deoxyadenosine	Nucleotides and derivatives	Nucleotides and derivatives	4754-39-6	2	32759.2	219996	81695	52914.2	61068.5	84903.9	100057	76731.5	83446.6	33902.7	27947.6	38990.5	C05198	-	1.25462	0.00748509	0.387499	-1.36774	down	-	-	-	-	-	-	-	-	-	-	-	-	-	-	-
C27H28O17	Luteolin-6-C-(2''-glucuronyl)glucoside	Flavonoids	Flavones	-	3	50623.9	67726.1	42382.6	66490.3	61040.8	43528	36149	31002.1	65020	13543.5	22660	21675	-	-	1.06308	0.136107	0.437905	-1.19131	down	-	-	-	-	-	-	-	-	-	-	-	-	-	-	-
C23H33N5O8	Leu-Phe-Asn-Asp	Amino acids and derivatives	Amino acids and derivatives	-	3	122295	148461	154166	464163	362029	256395	217262	290229	262133	346057	270984	215103	-	-	-	-	-	-	-	-	-	-	-	-	-	-	-	-	-	1.17515	0.0638263	2.54773	1.34921	up
C26H28O14	Isoschaftoside	Flavonoids	Flavones	52012-29-0	3	48345	92103.7	45010	23340	8340	18340	10005	18340	19013.9	15318.2	1789.57	10005	-	-	-	-	-	-	-	-	-	-	-	-	1.19461	0.088733	0.255361	-1.96939	down	1.09683	0.0868374	0.26971	-1.89052	down
C21H32O14	6'-O-Glucosylaucubin	Terpenoids	Sesquiterpenoids	-	3	27033.8	15343.7	22942.6	66037.5	47516.4	67858.9	11131.1	9774.13	16902.3	19865.7	24078.3	27407.4	-	-	-	-	-	-	-	1.18458	0.0113399	0.208406	-2.26253	down	-	-	-	-	-	1.17917	0.0129858	2.77728	1.47367	up
C6H14NO8P	D-Glucosamine 1-phosphate	Others	Saccharides	2152-75-2	3	84983.2	52834	76000.3	45636.4	21675	52468.1	31368.1	21558.7	19091.9	19504.7	12443.7	18686.7	C06156	ko00520,ko01100,ko01250	-	-	-	-	-	-	-	-	-	-	1.22089	0.0262905	0.336823	-1.56994	down	-	-	-	-	-
C16H24NO5+	Sinapine	Alkaloids	Phenolamine	18696-26-9	3	76837.1	18829.1	95035	31101	33688.5	28340	51680	98310.8	93370	26675	23813.1	53350	C00933	ko00940,ko01110	1.04227	0.0674702	0.426684	-1.22876	down	1.11371	0.0757029	2.61314	1.38579	up	-	-	-	-	-	-	-	-	-	-
C17H20O9	5-O-Feruloylquinic acid	Phenolic acids	Phenolic acids	-	3	4522.26	1357.71	4019.88	77462.9	117915	116205	9614	8802.82	13178.5	7860.87	13474.5	7588.17	-	-	-	-	-	-	-	1.20741	0.0185955	0.101402	-3.30184	down	1.10986	0.0147959	3.19149	1.67423	up	1.2352	0.0163941	31.4736	4.97607	up
C26H28O14	Apigenin-6-C-(2''-xylosyl)glucoside	Flavonoids	Flavones	-	3	129372	121231	120618	39466.5	106910	101148	119149	51034.2	49924.7	16937.3	18225.5	35010	-	-	1.08193	0.153891	0.318811	-1.64923	down	-	-	-	-	-	-	-	-	-	-	-	-	-	-	-
C14H18O10	Methyl 6-O-galloyl-glucoside	Phenolic acids	Phenolic acids	-	3	233947	103375	267855	48313.6	41522.7	48104.4	37809.3	39917.3	9413.81	17418.9	15893.1	14870.7	-	-	-	-	-	-	-	-	-	-	-	-	1.14616	0.0699005	0.143991	-2.79594	down	1.17244	0.0895974	0.227934	-2.13331	down
C18H22N4O7	Trp-Ser-Asp	Amino acids and derivatives	Amino acids and derivatives	-	3	153873	68304.3	68893.8	220706	344731	199876	278017	294823	352490	193658	142077	92654.3	-	-	1.13239	0.012507	0.462958	-1.11105	down	-	-	-	-	-	1.19611	0.00504652	3.17905	1.6686	up	1.07844	0.051548	2.6293	1.39468	up
C12H24N6O6	Arg-Ser-Ser	Amino acids and derivatives	Amino acids and derivatives	-	3	94008.7	98370	90035	661592	681279	685960	431257	513275	592947	319647	318831	524744	-	-	-	-	-	-	-	-	-	-	-	-	1.30065	0.0120517	5.44407	2.44468	up	1.26989	4.14236e-05	7.1839	2.84477	up
C9H6O3	7-Hydroxycoumarin;Umbelliferone	Lignans and Coumarins	Coumarins	93-35-6	1	2.22016e+06	1.66807e+06	4.84278e+06	22248350	9.87781e+06	9.86477e+06	2.80964e+06	6216155	2.56776e+06	8.87051e+06	8.85214e+06	7.64455e+06	C09315	ko00999,ko01110	1.08279	0.0477622	2.18804	1.12964	up	1.04902	0.124373	0.276096	-1.85676	down	-	-	-	-	-	1.11947	0.108038	4.8094	2.26586	up
C7H8O2	3,5-Dihydroxytoluene	Phenolic acids	Phenolic acids	504-15-4	3	46438.6	32929.9	41599.8	14874	18140.1	20331.4	31467	20850.3	46680	29872.1	45010	64945.4	C00727	-	-	-	-	-	-	-	-	-	-	-	-	-	-	-	-	1.20713	0.0182327	0.440987	-1.18119	down
C27H28O13	3-O-caffeioyl sinapyl quinic acid	Others	Others	-	3	24334.3	11554.5	14023.9	223972	150247	235956	74149.9	163204	50531.9	116803	99794.6	25198.8	-	-	-	-	-	-	-	-	-	-	-	-	1.17853	0.145202	5.76778	2.52802	up	1.24303	0.0182498	12.2248	3.61174	up
C8H8O2	Benzoic acid methyl ester	Phenolic acids	Phenolic acids	93-58-3	3	155059	427666	157213	874345	897908	875550	336397	367744	339140	598412	595862	571772	C20645	-	-	-	-	-	-	1.22147	3.6975e-06	0.394017	-1.34367	down	-	-	-	-	-	1.15009	0.0190625	3.57841	1.83932	up
C25H24O12	Isochlorogenic acid A*	Phenolic acids	Phenolic acids	2450-53-5	1	7.14457e+07	3.10548e+07	8.21627e+07	1.49292e+08	1.38098e+08	1.37676e+08	5.38026e+07	119700725	113153405	1.3839e+08	1.40095e+08	1.19683e+08	-	-	-	-	-	-	-	-	-	-	-	-	-	-	-	-	-	1.04868	0.0298247	2.30184	1.20279	up
C27H42O4	Spirost-5-ene-3,12-diol	Steroids	Steroid	-	2	108460	61088.7	182023	416790	234136	424757	191264	116005	87389.8	70521.3	20163.8	57879	-	-	-	-	-	-	-	1.05655	0.0485054	0.366891	-1.44658	down	-	-	-	-	-	1.06698	0.040002	3.05964	1.61336	up
C21H26O13	3-O-caffeoyl quininyl arabinoside	Others	Others	-	3	6.30122e+06	3.36482e+06	4.01927e+06	6.68141e+06	6.22323e+06	5.48851e+06	3.1689e+06	3.28548e+06	2.59732e+06	3.58441e+06	3.87641e+06	3.55102e+06	-	-	-	-	-	-	-	1.18553	0.00325126	0.492123	-1.02291	down	-	-	-	-	-	-	-	-	-	-
C25H24O12	Isochlorogenic acid C*	Phenolic acids	Phenolic acids	57378-72-0	1	4.51156e+07	3.14978e+07	8.41652e+07	1.4464e+08	132471794	1.34752e+08	5.55348e+07	122668335	118297335	141034726	1.41485e+08	126165680	-	-	-	-	-	-	-	-	-	-	-	-	-	-	-	-	-	1.09776	0.028356	2.56168	1.35709	up
C26H20O8	Acacetin-7-O-glucuronide	Flavonoids	Flavones	-	3	50870.6	74951.4	57624.9	32249.8	16042	53964.9	63929.5	81402.5	32732.4	20615	27054.6	15677.2	-	-	1.09432	0.1084	0.355752	-1.49105	down	-	-	-	-	-	-	-	-	-	-	-	-	-	-	-
C10H12O2	Eugenol*	Phenolic acids	Phenolic acids	97-53-0	3	9	9	9	271941	281737	424298	97883.7	161704	183840	203311	333168	234019	C10453	ko00940	-	-	-	-	-	1.04894	0.0486525	0.453414	-1.1411	down	1.30836	0.0290757	16423.2	14.0035	up	1.26944	0.022059	36221.3	15.1446	up
